# Supplementary material for: Quantifying variation in cooperative B–H bond activations using Os(ii) and Os(iii) κ2-N,S-chelated complexes: same, but different
Source: Royal Society of Chemistry journal article supplement (doi:10.1039/d4sc05092d), 2024-01-01
Supplement: d4sc05092d1.pdf [file d4sc05092d1.pdf]

**SUPPLEMENTARY INFORMATION**

**Quantifying Variation in Cooperative B-H Bond Activations by Os(II) and Os(III)  $\kappa^2$ -N,S-chelated Complexes: Same, but Different**

*Sourav Gayen, Faneesha Assanar, Sampad Shyamal, Dorothy Priyanka Dorairaj, and Sundargopal Ghosh\**

*Department of Chemistry, Indian Institute of Technology Madras, Chennai 600036, India. Tel: +91 44- 22574230; E-mail: [sghosh@iitm.ac.in](mailto:sghosh@iitm.ac.in)*

## Table of Contents

### I Supplementary Data

|           |                                                                                                                                                                                         |    |
|-----------|-----------------------------------------------------------------------------------------------------------------------------------------------------------------------------------------|----|
| Table S1  | g-values of <b>3a-b</b> determined by EPR spectroscopy in CH <sub>2</sub> Cl <sub>2</sub> at 77 K and redox Potentials of <b>2a-b</b> and <b>3a-b</b> determined by Cyclic Voltammetry. | S6 |
| Figure S1 | Molecular structure and labelling diagram of <i>cis-7</i> .                                                                                                                             | S6 |

### II Experimental Details

#### II.1 Synthesis and Characterizations S7 – S10

#### II.2 Spectroscopic Details

|            |                                                                                                                           |     |
|------------|---------------------------------------------------------------------------------------------------------------------------|-----|
| Figure S2  | ESI-MS spectrum of <b>2a</b> .                                                                                            | S11 |
| Figure S3  | <sup>1</sup> H NMR spectrum of <b>2a</b> in CDCl <sub>3</sub> .                                                           | S11 |
| Figure S4  | <sup>31</sup> P{ <sup>1</sup> H} NMR spectrum of <b>2a</b> in CDCl <sub>3</sub> .                                         | S12 |
| Figure S5  | <sup>13</sup> C{ <sup>1</sup> H} NMR spectrum of <b>2a</b> in CDCl <sub>3</sub> .                                         | S12 |
| Figure S6  | ESI-MS spectrum of <b>2b</b> .                                                                                            | S13 |
| Figure S7  | <sup>1</sup> H NMR spectrum of <b>2b</b> in CDCl <sub>3</sub> .                                                           | S13 |
| Figure S8  | <sup>31</sup> P{ <sup>1</sup> H} NMR spectrum of <b>2b</b> in CDCl <sub>3</sub> .                                         | S14 |
| Figure S9  | <sup>13</sup> C{ <sup>1</sup> H} NMR spectrum of <b>2b</b> in CDCl <sub>3</sub> .                                         | S14 |
| Figure S10 | ESI-MS spectrum of <b>3a</b> .                                                                                            | S15 |
| Figure S11 | (a) XPS survey spectrum of <b>3a</b> and elemental spectrum of Os(b), S(c), P(d), N(e) and C(f).                          | S15 |
| Figure S12 | ESI-MS spectrum of <b>3b</b> .                                                                                            | S16 |
| Figure S13 | (a) XPS survey spectrum of <b>3b</b> and elemental spectrum of Os(b), S(c), P(d), N(e) and C(f).                          | S16 |
| Figure S14 | EPR spectrum of <b>3a</b> (a) and <b>3b</b> (b).                                                                          | S17 |
| Figure S15 | ESI-MS spectrum of <b>4a</b> .                                                                                            | S17 |
| Figure S16 | <sup>11</sup> B{ <sup>1</sup> H} NMR spectrum of <b>4a</b> in CDCl <sub>3</sub> .                                         | S18 |
| Figure S17 | <sup>1</sup> H NMR spectrum of <b>4a</b> in CDCl <sub>3</sub> .                                                           | S18 |
| Figure S18 | Stacked <sup>1</sup> H (blue) and <sup>1</sup> H{ <sup>11</sup> B} (red) NMR spectrum of <b>4a</b> in CDCl <sub>3</sub> . | S19 |
| Figure S19 | <sup>31</sup> P{ <sup>1</sup> H} NMR spectrum of <b>4a</b> in CDCl <sub>3</sub> .                                         | S19 |
| Figure S20 | <sup>13</sup> C{ <sup>1</sup> H} NMR spectrum of <b>4a</b> in CDCl <sub>3</sub> .                                         | S20 |
| Figure S21 | IR spectrum of <b>4a</b> .                                                                                                | S20 |
| Figure S22 | ESI-MS spectrum of <b>4b</b> .                                                                                            | S21 |
| Figure S23 | <sup>11</sup> B{ <sup>1</sup> H} NMR spectrum of <b>4b</b> in CDCl <sub>3</sub> .                                         | S21 |
| Figure S24 | <sup>1</sup> H NMR spectrum of <b>4b</b> in CDCl <sub>3</sub> CH <sub>2</sub> Cl <sub>2</sub> .                           | S22 |
| Figure S25 | <sup>31</sup> P{ <sup>1</sup> H} NMR spectrum of <b>4b</b> in CDCl <sub>3</sub> .                                         | S22 |
| Figure S26 | <sup>13</sup> C{ <sup>1</sup> H} NMR spectrum of <b>4b</b> in CDCl <sub>3</sub> .                                         | S23 |
| Figure S27 | IR spectrum of <b>4b</b> .                                                                                                | S23 |
| Figure S28 | ESI-MS spectrum of <b>5</b> .                                                                                             | S24 |
| Figure S29 | <sup>11</sup> B{ <sup>1</sup> H} NMR spectrum of <b>5</b> in CDCl <sub>3</sub> .                                          | S24 |

|            |                                                                                                                                  |     |
|------------|----------------------------------------------------------------------------------------------------------------------------------|-----|
| Figure S30 | $^1\text{H}$ NMR spectrum of <b>5</b> in $\text{CDCl}_3$ .                                                                       | S25 |
| Figure S31 | $^{31}\text{P}\{^1\text{H}\}$ NMR spectrum of <b>5</b> in $\text{CDCl}_3$ .                                                      | S25 |
| Figure S32 | $^{13}\text{C}\{^1\text{H}\}$ NMR spectrum of <b>5</b> in $\text{CDCl}_3$ .                                                      | S26 |
| Figure S33 | IR spectrum of <b>5</b> .                                                                                                        | S26 |
| Figure S34 | ESI-MS spectrum of <i>trans</i> - <b>6</b> .                                                                                     | S27 |
| Figure S35 | $^{11}\text{B}\{^1\text{H}\}$ NMR spectrum of <i>trans</i> - <b>6</b> in $\text{CDCl}_3$ .                                       | S27 |
| Figure S36 | $^1\text{H}$ NMR spectrum of <i>trans</i> - <b>6</b> in $\text{CDCl}_3$ .                                                        | S28 |
| Figure S37 | Stacked $^1\text{H}$ (blue) and $^1\text{H}\{^{11}\text{B}\}$ (red) NMR spectrum of <i>trans</i> - <b>6</b> in $\text{CDCl}_3$ . | S28 |
| Figure S38 | $^{31}\text{P}\{^1\text{H}\}$ NMR spectrum of <i>trans</i> - <b>6</b> in $\text{CDCl}_3$ .                                       | S29 |
| Figure S39 | $^{13}\text{C}\{^1\text{H}\}$ NMR spectrum of <i>trans</i> - <b>6</b> in $\text{CDCl}_3$ .                                       | S29 |
| Figure S40 | IR spectrum of <i>trans</i> - <b>6</b> .                                                                                         | S30 |
| Figure S41 | ESI-MS spectrum of <i>cis</i> - <b>6</b> .                                                                                       | S30 |
| Figure S42 | $^{11}\text{B}\{^1\text{H}\}$ NMR spectrum of <i>cis</i> - <b>6</b> in $\text{CDCl}_3$ .                                         | S31 |
| Figure S43 | $^1\text{H}$ NMR spectrum of <i>cis</i> - <b>6</b> in $\text{CDCl}_3$ .                                                          | S31 |
| Figure S44 | $^{31}\text{P}\{^1\text{H}\}$ NMR spectrum of <i>cis</i> - <b>6</b> in $\text{CDCl}_3$ .                                         | S32 |
| Figure S45 | $^{13}\text{C}\{^1\text{H}\}$ NMR spectrum of <i>cis</i> - <b>6</b> in $\text{CDCl}_3$ .                                         | S32 |
| Figure S46 | IR spectrum of <i>cis</i> - <b>6</b> .                                                                                           | S33 |
| Figure S47 | ESI-MS spectrum of <i>cis</i> - <b>7</b> .                                                                                       | S33 |
| Figure S48 | $^{11}\text{B}\{^1\text{H}\}$ NMR spectrum of <i>cis</i> - <b>7</b> in $\text{CDCl}_3$ .                                         | S34 |
| Figure S49 | $^1\text{H}$ NMR spectrum of <i>cis</i> - <b>7</b> in $\text{CDCl}_3$ .                                                          | S34 |
| Figure S50 | $^{31}\text{P}\{^1\text{H}\}$ NMR spectrum of <i>cis</i> - <b>7</b> in $\text{CDCl}_3$ .                                         | S35 |
| Figure S51 | $^{13}\text{C}\{^1\text{H}\}$ NMR spectrum of <i>cis</i> - <b>7</b> in $\text{CDCl}_3$ .                                         | S35 |
| Figure S52 | IR spectrum of <i>cis</i> - <b>7</b> .                                                                                           | S36 |

### II.3 X-ray Analysis Details S36-S37

### III Computational Details S37

|            |                                                                                                                                                                                                                |           |
|------------|----------------------------------------------------------------------------------------------------------------------------------------------------------------------------------------------------------------|-----------|
| Table S2   | Selected geometrical parameters and Wiberg Bond Indices (WBI) of <b>2a-b</b> , <b>3a-b</b> , <b>4a-b</b> , <b>5'</b> , <i>trans</i> - <b>6</b> and <i>cis</i> - <b>6</b> .                                     | S38       |
| Table S3   | Experiment and calculated $^{11}\text{B}$ NMR, calculated natural charge and HOMO-LUMO energy gap of <b>2a-b</b> , <b>3a-b</b> , <b>4a-b</b> , <b>5'</b> , <i>trans</i> - <b>6</b> and <i>cis</i> - <b>6</b> . | S39 – S40 |
| Table S4   | Topological parameters at selected bond critical points (BCPs) of <b>2a-b</b> , <b>3a-b</b> , <b>4a-b</b> , <b>5'</b> , <i>trans</i> - <b>6</b> and <i>cis</i> - <b>6</b> .                                    | S40 – S41 |
| Figure S53 | Selected molecular orbitals of <b>2a</b> .                                                                                                                                                                     | S41       |
| Figure S54 | Selected NBOs of <b>2a</b> .                                                                                                                                                                                   | S42       |
| Figure S55 | Contour-line diagram of the Laplacian of electron density in the Os1-N1-C5-S1 (a) and Os1-N2-C10-S2 (b) planes of <b>2a</b> , respectively.                                                                    | S42       |
| Figure S56 | ELF plot in the Os1-N1-C5-S1 (a) and Os1-N2-C10-S2 (b) planes of <b>2a</b> , respectively.                                                                                                                     | S42       |
| Figure S57 | Selected molecular orbitals of <b>2b</b> .                                                                                                                                                                     | S43       |
| Figure S58 | Selected NBOs of <b>2b</b> .                                                                                                                                                                                   | S43       |

|            |                                                                                                                                                                                                                              |     |
|------------|------------------------------------------------------------------------------------------------------------------------------------------------------------------------------------------------------------------------------|-----|
| Figure S59 | Contour-line diagram of the Laplacian of electron density in the Os1-N1-C5-S1 (a) and Os1-N2-C10-S2 (b) planes of <b>2b</b> , respectively.                                                                                  | S43 |
| Figure S60 | ELF plot in the Os1-N1-C5-S1 (a) and Os1-N2-C10-S2 (b) planes of <b>2b</b> , respectively.                                                                                                                                   | S44 |
| Figure S61 | Selected molecular orbitals of <b>3a</b> .                                                                                                                                                                                   | S44 |
| Figure S62 | Selected NBOs of <b>3a</b> .                                                                                                                                                                                                 | S44 |
| Figure S63 | Contour-line diagram of the Laplacian of electron density in the Os1-N1-C4-S2 (a), Os1-N2-C8-S3 (b) planes and Os1-S1 (c) bond of <b>3a</b> , respectively.                                                                  | S45 |
| Figure S64 | ELF plot in the Os1-N1-C5-S1 (a) and Os1-N2-C10-S2 (b) planes of <b>3a</b> , respectively.                                                                                                                                   | S45 |
| Figure S65 | Selected molecular orbitals of <b>3b</b> .                                                                                                                                                                                   | S45 |
| Figure S66 | Selected NBOs of <b>3b</b> .                                                                                                                                                                                                 | S46 |
| Figure S67 | Contour-line diagram of the Laplacian of electron density in the Os1-N1-C4-S2 (a), Os1-N2-C8-S3 (b) planes and Os1-S1 (c) bond of <b>3b</b> , respectively.                                                                  | S46 |
| Figure S68 | ELF plot in the Os1-N1-C5-S1 (a) and Os1-N2-C10-S2 (b) planes of <b>3b</b> , respectively.                                                                                                                                   | S46 |
| Figure S69 | Selected molecular orbitals of <b>4a</b> .                                                                                                                                                                                   | S47 |
| Figure S70 | Selected NBOs of <b>4a</b> .                                                                                                                                                                                                 | S47 |
| Figure S71 | (a) Contour-line diagram of the Laplacian of electron density along Os-S and OS-P bonds in the Os1-S2-S1-P1-P2 planes and of <b>4a</b> ; (b) . ELF plot in the H1C-Os1-H2B-B1 plane.                                         | S47 |
| Figure S72 | Selected molecular orbitals of <b>4b</b> .                                                                                                                                                                                   | S48 |
| Figure S73 | Selected NBOs of <b>4b</b> .                                                                                                                                                                                                 | S48 |
| Figure S74 | Contour-line diagram of the Laplacian of electron density along Os-S and OS-P bonds in the Os1-S2-S1-P1-P2 (a) and H1C-Os1-H2B-B1 (b) planes and of <b>4b</b> ; (b) ELF plot in the H1C-Os1-H2B-B1 plane of <b>4b</b> .      | S48 |
| Figure S75 | Comparison of HOMO-LUMO gap between <b>2a-b</b> and <b>4a-b</b> .                                                                                                                                                            | S49 |
| Figure S76 | Selected molecular orbitals of <b>5'</b> .                                                                                                                                                                                   | S49 |
| Figure S77 | Selected NBOs of <b>5'</b> .                                                                                                                                                                                                 | S49 |
| Figure S78 | (a) Contour-line diagram of the Laplacian of electron density in the Os1-N2-C19-S2 plane of <b>5'</b> ; ELF plot in Os1-H2A-B1-H2B (b) and Os1-N2-C19-S2 (c) planes of <b>5'</b> .                                           | S50 |
| Figure S79 | Selected molecular orbitals of <i>trans</i> - <b>6</b> .                                                                                                                                                                     | S50 |
| Figure S80 | Selected NBOs of <i>trans</i> - <b>6</b> .                                                                                                                                                                                   | S50 |
| Figure S81 | (a) Contour-line diagram of the Laplacian of electron density in the Os1-N3-C25-S3 plane of <i>trans</i> - <b>6</b> ; ELF plot in Os1-H1B-B1 (b) and the Os1-N3-C25-S3 (c) planes of <i>trans</i> - <b>6</b> , respectively. | S51 |
| Figure S82 | Comparison of HOMO-LUMO gap between <b>3a-b</b> and <b>5'</b> , <i>trans</i> - <b>6</b> .                                                                                                                                    | S51 |
| Figure S83 | Selected molecular orbitals of <i>cis</i> - <b>6</b> .                                                                                                                                                                       | S52 |
| Figure S84 | Selected NBOs of <i>cis</i> - <b>6</b> .                                                                                                                                                                                     | S52 |
| Figure S85 | Contour-line diagram of the Laplacian of electron density in the Os1-H2B-B1 (a) and Os1-N1-C7-S4 (b) planes of <i>cis</i> - <b>6</b> , respectively; (c) ELF plot in Os1H2BB1 of <i>cis</i> - <b>6</b> .                     | S52 |

#### IV Cartesian Coordinates of all Optimized Structures

|            |                                                 |           |
|------------|-------------------------------------------------|-----------|
| Figure S86 | Optimized geometry of <b>2a</b> .               | S53 – S54 |
| Figure S87 | Optimized geometry of <b>2b</b> .               | S55 – S56 |
| Figure S88 | Optimized geometry of <b>3a</b> .               | S56 – S57 |
| Figure S89 | Optimized geometry of <b>3b</b> .               | S58 – S59 |
| Figure S90 | Optimized geometry of <b>4a</b> .               | S59 – S60 |
| Figure S91 | Optimized geometry of <b>4b</b> .               | S61 – S62 |
| Figure S92 | Optimized geometry of <b>5'</b> .               | S62 – S63 |
| Figure S93 | Optimized geometry of <i>trans</i> - <b>6</b> . | S63 – S64 |
| Figure S94 | Optimized geometry of <i>cis</i> - <b>6</b> .   | S65 – S66 |

#### V References

S66

## I Supplementary Data

**Table S1.** *g*-values of **3a-b** determined by EPR spectroscopy in CH<sub>2</sub>Cl<sub>2</sub> at 77 K and redox Potentials of **2a-b** and **3a-b** determined by Cyclic Voltammetry.

| Complexes                                                                                       | <i>g</i> -value | Redox Potentials            |                             |                           |                           |
|-------------------------------------------------------------------------------------------------|-----------------|-----------------------------|-----------------------------|---------------------------|---------------------------|
|                                                                                                 |                 | <i>E</i> <sup>1</sup> ,V    | <i>E</i> <sup>2</sup> ,V    | <i>E</i> <sup>3</sup> ,V  | <i>E</i> <sup>4</sup> ,V  |
| 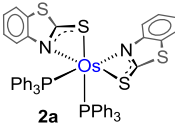<br><b>2a</b>  | -               | 0.029 (red)<br>0.162 (ox)   | 0.793 (red)<br>1.104 (ox)   | -                         | -                         |
| <br><b>2b</b>  | -               | -0.378 (red)<br>-0.196 (ox) | 0.635 (red)<br>0.892 (ox)   | -                         | -                         |
| <br><b>3a</b>  | 2.157           | -1.046 (red)<br>-0.965 (ox) | -0.023 (red)<br>0.084 (ox)  | 0.429 (red)<br>0.555 (ox) | 0.942 (red)<br>1.050 (ox) |
| <br><b>3b</b> | 2.136           | -1.190 (red)<br>-1.063 (ox) | -0.601 (red)<br>-0.032 (ox) | 0.458 (ox)                | 1.103 (ox)                |

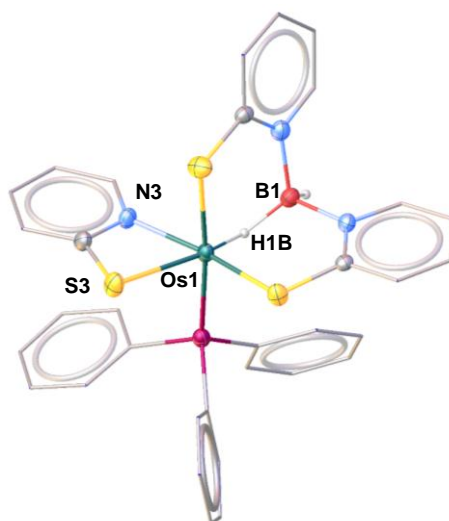

**Figure S1.** Molecular structure and labelling diagram of *cis*-7. Selected bond lengths (Å) and bond angles (°) of *cis*-7: Os1-P1 2.3048(16), Os1-B1 2.394(7), Os1-S1 2.3385(17), Os1-S2 2.4011(18), N3-Os1-P1 92.68(14).

## II Experimental Details

### General Procedures and Instrumentation

All manipulations were carried out using standard Schlenk line and glove box techniques under inert atmosphere of dry argon. Solvents such as toluene, hexane and THF were distilled through Na/benzophenoneketyl and dichloromethane was dried over calcium hydride prior to use under argon. Chloroform-d was degassed by three freeze-thaw cycles, dried over calcium hydride for 12 h, and stored over 4 Å molecular sieves in a Young's ampoule under argon.  $[\text{Os}(\text{PPh}_3)_3\text{Cl}_2]$  was synthesized according to the literature procedure<sup>1</sup> and other chemical such as 2-mercaptobenzothiazole, 2-mercaptopyridine,  $\text{BH}_3\cdot\text{SMe}_2$  were obtained commercially (Sigma Aldrich) and used as received. The external reference for the  $^{11}\text{B}$  NMR spectroscopy,  $[\text{Bu}_4\text{N}][(\text{B}_3\text{H}_8)]$  was synthesized according to the literature method.<sup>2</sup> The  $^1\text{H}$ ,  $^{11}\text{B}\{^1\text{H}\}$ ,  $^{13}\text{C}\{^1\text{H}\}$ , and  $^{31}\text{P}\{^1\text{H}\}$  NMR spectra were recorded on Bruker 400 and 500 MHz instruments. The residual solvent protons were used as reference ( $\delta$ , ppm, benzene- $d_6$ , 7.16,  $\text{CDCl}_3$ , 7.26, Toluene- $d_8$ , 7.09 ppm), while a sealed tube containing  $[\text{Bu}_4\text{N}][(\text{B}_3\text{H}_8)]$  in benzene- $d_6$  ( $^6\text{B}$ , ppm, -30.07) was used as an external reference for  $^{11}\text{B}\{^1\text{H}\}$  NMR spectra.  $^1\text{H}$  decoupled  $^{11}\text{B}\{^1\text{H}\}$  spectra of all compounds were processed with a backward linear prediction algorithm to remove the broad  $^{11}\text{B}\{^1\text{H}\}$  background signal of the NMR tube.<sup>3</sup> The preparative TLC was performed with Merck 105554 TLC silica gel 60 F254 and thickness of layer 250  $\mu\text{m}$  on aluminum sheets with 20x20 cm size. Mass spectra were carried out using Qtof Micro YA263 HRMS instrument and Bruker MicroTOF-II mass spectrometer in ESI ionization mode. UV-vis absorption spectra were gained from Jasco V-650 spectrometer. Infrared spectra were obtained on a Jasco FT/IR-1400 spectrometer. 6X-ray photoelectron spectroscopy The X-ray photoelectron spectroscopy (XPS) was carried out in the Omicron ESCA probe TPD instrument. Aluminium source (1486.7 eV) was used to generate non-monochromatic X-rays from a dual anode source with an X-ray power of 300 W. The survey scan was done from 0 to 1100 eV with a pass energy of 50 eV and a step size of 0.5 eV to identify all the elements present in the sample. Detailed scans were done for all the elements of interest with a pass energy of 20 eV and a step size of 0.1 eV to get better resolution for the peaks.

### II.1 Synthesis and Characterizations

**Syntheses of 2a and 3a:** In a flame-dried Schlenk tube,  $[\text{Os}(\text{PPh}_3)_3\text{Cl}_2]$ , **1** (0.500 g, 0.955 mmol) dissolved in 25 mL of toluene, was added to the solution of  $\text{K}[\text{L}^a]$  ( $\text{L}^a = 2\text{-mercaptobenzothiazole}$ , (0.980g, 4.775 mmol) in 30 mL of THF and was thermalized for 12h at 60 °C. The colour of the reaction mixture changed from green to orange ( $\text{L}^a$ ). The solvent was evaporated in vacuum; residue was extracted into hexane/ $\text{CH}_2\text{Cl}_2$  (80:20 v/v) and passed through Celite. After the removal of solvent from filtrate, the residue was subjected to chromatographic work-up using silica-gel TLC plates. Elution with hexane/ $\text{CH}_2\text{Cl}_2$  (70:30 v/v) yielded orange **2a** (0.210 g, 42%) and green **3a** (0.095 g, 21%).

**Modified Syntheses of 2a and 3a:** In a flame-dried Schlenk tube,  $[\text{Os}(\text{PPh}_3)_3\text{Cl}_2]$ , **1** (0.500 g, 0.955 mmol) dissolved in 25 mL of toluene, was added to the solution of  $\text{K}[\text{L}^a]$  ( $\text{L}^a = 2\text{-mercaptobenzothiazole}$ , (0.980g, 4.775 mmol) in 30 mL of THF. Then, an excess amount of triethylamine ( $\text{NEt}_3$ ) was added to the mixture and was thermalized for 8h at 45 °C. The colour of the reaction mixture changed from green to yellow ( $\text{L}^a$ ). The solvent was evaporated in vacuum; residue was extracted into hexane/ $\text{CH}_2\text{Cl}_2$  (80:20 v/v) and passed through Celite. After the removal of solvent from filtrate, the residue was subjected to chromatographic work-up using silica-gel TLC plates. Elution with hexane/ $\text{CH}_2\text{Cl}_2$  (70:30 v/v) yielded orange **2a** (0.175 g, 30%) and green **3a** (0.158 g, 35%).

**2a:** MS (ESI<sup>+</sup>): *m/z* calculated for [M+H]<sup>+</sup>: 1049.1084, found: 1049.1018; <sup>1</sup>H NMR (500 MHz, CDCl<sub>3</sub>, 22 °C): δ = 7.94 (d, J = 8.04 Hz, 2H Ar<sub>(mbz)</sub>), 7.15 (d, J = 8.22 Hz, 2H Ar<sub>(mbz)</sub>), 6.84 – 7.25 (m, 30H, Ar<sub>(Phosphine)</sub> + 4H, Ar<sub>(mbz)</sub>) ppm; <sup>31</sup>P{<sup>1</sup>H} NMR (202 MHz, CDCl<sub>3</sub>, 22 °C): δ = -5.5 (s, 2P); <sup>13</sup>C{<sup>1</sup>H} NMR (100 MHz, CDCl<sub>3</sub>, 22 °C): δ = 185.7 (s, C=S, mbz), 149.7 (s, C-N, mbz), 137.4–117.8 (s, Ar) ppm.

**3a:** MS (ESI<sup>+</sup>): *m/z* calculated for [M+Na]<sup>+</sup>: 974.9771, found: 974.9754.

**Syntheses of 2b and 3b:** Under similar reactions conditions as above, reaction of [Os(PPh<sub>3</sub>)<sub>3</sub>Cl<sub>2</sub>], **1** (0.500 g, 0.955 mmol) and K[L<sup>b</sup>] (L<sup>b</sup> = 2-mercaptopyridine, 0.712 g, 4.775 mmol) yielded yellow solid **2b** (0.205 g, 46%) and violet **3b** (0.097 g, 18%).

**Modified Syntheses of 2b and 3b:** Under similar reactions conditions as above, reaction of [Os(PPh<sub>3</sub>)<sub>3</sub>Cl<sub>2</sub>], **1** (0.500 g, 0.955 mmol) and K[L<sup>b</sup>] (L<sup>b</sup> = 2-mercaptopyridine, 0.712 g, 4.775 mmol) in the presence of excess NEt<sub>3</sub> yielded yellow solid **2b** (0.142 g, 32%) and violet **3b** (0.135 g, 25%).

**2b:** MS (ESI<sup>+</sup>): *m/z* calculated for [M]<sup>+</sup>: 936.1569, found: 936.1434; <sup>1</sup>H NMR (500 MHz, CDCl<sub>3</sub>, 22 °C): δ = 7.57 (d, J = 5.2 Hz, 2H Ar<sub>(mp)</sub>), 6.81 (t, J = 7.90 Hz, 2H Ar<sub>(mp)</sub>), 6.23 (d, J = 6.36 Hz, 2H Ar<sub>(mp)</sub>), 6.14 (t, J = 6.36 Hz, 2H Ar<sub>(mp)</sub>), 7.21 (m, 12H Ar<sub>(Phosphine)</sub>), 6.97 (m, 12H Ar<sub>(Phosphine)</sub>), 7.08 (m, 6H Ar<sub>(Phosphine)</sub>), <sup>31</sup>P{<sup>1</sup>H} NMR (202 MHz, CDCl<sub>3</sub>, 22 °C): δ = -4.3 (s, 2P); <sup>13</sup>C{<sup>1</sup>H} NMR (100 MHz, CDCl<sub>3</sub>, 22 °C): δ = 184.3 (s, C=S, mp), 144.5 (s, C-N, mp), 137.5–115.2 (s, Ar) ppm.

**3b:** MS (ESI<sup>+</sup>): *m/z* calculated for [M+H]<sup>+</sup>: 785.0796, found: 785.0740.

**Syntheses of 4a and 4b:** In a flame-dried Schlenk tube, [(PPh<sub>3</sub>)<sub>2</sub>Os(κ<sup>2</sup>-N,S-C<sub>7</sub>H<sub>4</sub>NS<sub>2</sub>)<sub>2</sub>], **2a** (100 mg, 0.093 mmol) in 15 mL dry toluene was treated with stoichiometric BH<sub>3</sub>·SMe<sub>2</sub> at room temperature. The reaction mixture was allowed to stir at room temperature for 12 h. The volatile components were removed under vacuum and the remaining residue was extracted into hexane/CH<sub>2</sub>Cl<sub>2</sub> (80:20 v/v) and passed through Celite. After removal of the solvent, the residue was subjected to chromatographic work-up by using TLC plates. Elution with hexane/CH<sub>2</sub>Cl<sub>2</sub> (80:20 v/v) mixture yielded yellow solid **4a** (27 mg, 28%).

Under similar reaction conditions, reaction of [(PPh<sub>3</sub>)<sub>2</sub>Os(κ<sup>2</sup>-N,S-C<sub>5</sub>H<sub>4</sub>NS)<sub>2</sub>], **2b** (100 mg, 0.106 mmol) with stoichiometric BH<sub>3</sub>·SMe<sub>2</sub> yielded orange solid **4b** (17 mg, 16%).

**4a:** MS (ESI<sup>+</sup>): *m/z* calculated for [M-H]<sup>+</sup>: 1061.1258, found: 1061.1318; <sup>11</sup>B{<sup>1</sup>H} NMR (160 MHz, CDCl<sub>3</sub>, 22 °C): δ = -3.3 (br, 1B) ppm; δ = 7.89 (d, J = 8.35 Hz, 2H Ar<sub>(mbz)</sub>), 7.29 (d, J = 8.06 Hz, 2H Ar<sub>(mbz)</sub>), 7.07 (d, J = 7.46 Hz, 2H Ar<sub>(mbz)</sub>), 7.03 (t, J = 7.75 Hz, 2H Ar<sub>(mbz)</sub>), 6.95–7.77 (m, 30H, Ar<sub>(Phosphine)</sub>) 3.55 (br, B-H<sub>t</sub>), -7.78 (br, 1H, Os-H<sub>b</sub>-B), -13.26 (br, 1H, Os-H<sub>t</sub>) ppm; <sup>31</sup>P{<sup>1</sup>H} NMR (202 MHz, CDCl<sub>3</sub>, 22 °C): δ = 19.2 (s, 2P) ppm; <sup>13</sup>C{<sup>1</sup>H} NMR (100 MHz, CDCl<sub>3</sub>, 22 °C): δ = 197.0 (s, C=S, mbz), 143.3 (s, C-N, mbz), 136.7–115.6 (s, Ar) ppm; IR (dichloromethane, cm<sup>-1</sup>): ν̃ = 2537 (BH<sub>t</sub>), 1073 (C=S).

**4b:** MS (ESI<sup>+</sup>): *m/z* calculated for [M-BH<sub>3</sub>]<sup>+</sup>: 936.1569, found: 936.1506; <sup>11</sup>B{<sup>1</sup>H} NMR (160 MHz, CDCl<sub>3</sub>, 22 °C): δ = 10.1 (br, 1B) ppm <sup>1</sup>H NMR (500 MHz, CDCl<sub>3</sub>, 22 °C): δ = 7.60–6.95 (m, H<sub>Ar</sub>) {Due to the presence of an inseparable impurity, we were unable to assign the aromatic protons of **4b**}, 3.55 (br, B-H<sub>t</sub>), -9.36 (br, 1H, Os-H<sub>b</sub>-B), -12.57 (br, 1H, Os-H<sub>t</sub>) ppm; <sup>31</sup>P{<sup>1</sup>H} NMR (202 MHz, CDCl<sub>3</sub>, 22 °C): δ = 28.9 (s, 2P) ppm; <sup>13</sup>C{<sup>1</sup>H} NMR (100 MHz, CDCl<sub>3</sub>, 22 °C): δ = 146.1 (s, C-N, mbz), 135.6–114.0 (s, Ar) ppm; IR (dichloromethane, cm<sup>-1</sup>): ν̃ = 2477 (BH<sub>t</sub>), 1032 (C=S).

**Synthesis of 5:** In a flame-dried Schlenk tube **3b** (100 mg, 0.142 mmol) in 15 mL dry toluene was treated with stoichiometric BH<sub>3</sub>·SMe<sub>2</sub> at room temperature. The reaction mixture was allowed to stir



at room temperature for 2 h. The volatile components were removed under vacuum and the remaining residue was extracted into hexane/CH<sub>2</sub>Cl<sub>2</sub> (60:40 v/v) and passed through Celite. After removal of the solvent, the residue was subjected to chromatographic work-up by using TLC plates. Elution with hexane/CH<sub>2</sub>Cl<sub>2</sub> (65:35 v/v) mixture yielded orange solid **5** (18 mg, 18%).

**5:** MS (ESI<sup>+</sup>): *m/z* calculated for [M-H]<sup>+</sup>: 703.0854, found: 703.0827; <sup>11</sup>B{<sup>1</sup>H} NMR (160 MHz, CDCl<sub>3</sub>, 22 °C): δ = 62.5 (br, 1B) ppm; <sup>1</sup>H NMR (500 MHz, CDCl<sub>3</sub>, 22 °C): δ 8.38 (d, J = 6.26 Hz, 2H Ar<sub>(mp)</sub>), 8.23 (d, J = 6.67 Hz, 1H Ar<sub>(mp)</sub>), 7.79 (d, J = 8.62 Hz, 1H Ar<sub>(mp)</sub>), 6.92 (t, J = 7.67 Hz, 1H Ar<sub>(mp)</sub>), 6.72 (t, J = 6.89 Hz, 1H Ar<sub>(mp)</sub>), 6.47 (d, J = 8.25 Hz, 1H Ar<sub>(mp)</sub>), 6.28 (d, J = 6.31 Hz, 1H Ar<sub>(mp)</sub>), 7.28-7.61 (m, 15H Ar<sub>(Phosphine)</sub>), 3.90 (br, OH), -13.66 (br, 1H, Os-H<sub>b</sub>-B), -13.81 (br, 1H, Os-H<sub>b</sub>-B) ppm; <sup>31</sup>P{<sup>1</sup>H} NMR (202 MHz, CDCl<sub>3</sub>, 22 °C): δ = 16.4 (s, 1P) ppm; <sup>13</sup>C{<sup>1</sup>H} NMR (100 MHz, CDCl<sub>3</sub>, 22 °C): δ = 182.4 (s, C=S, mp), 150.7, 146.9 (s, C-N, mp), 138.2–113.5 (s, Ar) ppm; IR (dichloromethane, cm<sup>-1</sup>):  $\tilde{\nu}$  = 3393 (OH), 1070 (C=S).

**Synthesis of trans-6:** In a flame-dried Schlenk tube **3a** (100 mg, 0.106 mmol) in 10 mL dry toluene was treated with stoichiometric BH<sub>3</sub>·SMe<sub>2</sub> at room temperature. The reaction mixture was allowed to stir at room temperature for 2 h. The volatile components were removed under vacuum and the remaining residue was extracted into hexane/CH<sub>2</sub>Cl<sub>2</sub> (85:15 v/v) and passed through Celite. After removal of the solvent, the residue was subjected to chromatographic work-up by using TLC plates. Elution with a *n*-hexane/CH<sub>2</sub>Cl<sub>2</sub> (70:30 v/v) mixture yielded red solid *trans*-**6** (21 mg, 21%).

*trans*-**6:** MS (ESI<sup>+</sup>): *m/z* calculated for [M]<sup>+</sup>: 965.0124, found: 965.0099; <sup>11</sup>B{<sup>1</sup>H} NMR (160 MHz, CDCl<sub>3</sub>, 22 °C): δ = -3.7 (br, 1B) ppm; <sup>1</sup>H NMR (500 MHz, CDCl<sub>3</sub>, 22 °C): 7.92 (d, J = 8.58 Hz, 2H Ar<sub>(mbz)</sub>), 7.65 (d, J = 8.08 Hz, 2H Ar<sub>(mbz)</sub>), 6.93 (t, J = 7.66 Hz, 1H Ar<sub>(mbz)</sub>), 7.00 (t, J = 7.67 Hz, 1H Ar<sub>(mbz)</sub>), 7.11-7.47 (m, 15H, Ar<sub>(Phosphine)</sub> + 6H, Ar<sub>(mbz)</sub>), 5.15 (br, B-H<sub>t</sub>) -4.56 (br, 1H, Os-H<sub>b</sub>-B) ppm; <sup>31</sup>P{<sup>1</sup>H} NMR (202 MHz, CDCl<sub>3</sub>, 22 °C): δ = 9.1 (s, 1P) ppm; <sup>13</sup>C{<sup>1</sup>H} NMR (100 MHz, CDCl<sub>3</sub>, 22 °C): δ = 193.4, 185.0 (s, C=S, mbz), 149.7-143.5 (s, C-N, mbz), 132.9–114.9 (s, Ar) ppm; IR (dichloromethane, cm<sup>-1</sup>):  $\tilde{\nu}$  = 2563 (BH<sub>t</sub>), 1037 (C=S).

**Synthesis of cis-6 and cis-7:** In a flame-dried Schlenk tube, [Os(PPh<sub>3</sub>)<sub>3</sub>Cl<sub>2</sub>], **1** (0.100 g, 0.191 mmol) dissolved in 10 mL of toluene, was added to the solution of Na[(H<sub>2</sub>B)(L<sup>a</sup>)<sub>2</sub>] (L<sup>a</sup> = 2-mercaptobenzothiazole, 0.141 g, 0.382 mmol) in 10 mL of THF and was thermalized for 12h at 60 °C. The colour of the reaction mixture changed from green to red (L<sup>a</sup>). The solvent was evaporated in vacuum; residue was extracted into hexane/CH<sub>2</sub>Cl<sub>2</sub> (60:40 v/v) and passed through Celite. After the removal of solvent from filtrate, the residue was subjected to chromatographic work-up using silica-gel TLC plates. Elution with hexane/CH<sub>2</sub>Cl<sub>2</sub> (80:20 v/v) yielded yellow *cis*-**6** (20 mg, 11%).

Under similar reaction conditions as above, reaction of [Os(PPh<sub>3</sub>)<sub>3</sub>Cl<sub>2</sub>], **1** (0.100 g, 0.191 mmol) and Na[(H<sub>2</sub>B)(L<sup>b</sup>)<sub>2</sub>] (L<sup>b</sup> = 2-mercaptopyridine, 0.94 g, 0.382 mmol) yielded red solid *cis*-**7** (20mg, 13%).

*cis*-**6:** MS (ESI<sup>+</sup>): *m/z* calculated for [M]<sup>+</sup>: 965.0124, found: 965.0106; <sup>11</sup>B{<sup>1</sup>H} NMR (160 MHz, CDCl<sub>3</sub>, 22 °C): δ = -3.6 (br, 1B) ppm; <sup>1</sup>H NMR (500 MHz, CDCl<sub>3</sub>, 22 °C): 8.26 (d, J = 8.28 Hz, 1H Ar<sub>(mbz)</sub>), 7.81 (d, J = 7.95 Hz, 2H Ar<sub>(mbz)</sub>), 7.36 (d, J = 8.35 Hz, 1H Ar<sub>(mbz)</sub>), 7.31 (d, J = 7.75 Hz, 2H Ar<sub>(mbz)</sub>), 7.08 (t, J = 7.65 Hz, 1H Ar<sub>(mbz)</sub>), 6.73 (t, J = 7.49 Hz, 1H Ar<sub>(mbz)</sub>), 6.58 (t, J = 7.49 Hz, 1H Ar<sub>(mbz)</sub>), 6.45 (d, J = 8.21 Hz, 1H Ar<sub>(mbz)</sub>), 7.03-7.61 (m, 15H, Ar<sub>(Phosphine)</sub> + 2H, Ar<sub>(mbz)</sub>), 5.74 (br, B-H<sub>t</sub>), -13.83 (br, 1H, Os-H<sub>b</sub>-B) ppm; <sup>31</sup>P{<sup>1</sup>H} NMR (202 MHz, CDCl<sub>3</sub>, 22 °C): δ = 4.6 (s, 1P) ppm; <sup>13</sup>C{<sup>1</sup>H} NMR (100 MHz, CDCl<sub>3</sub>, 22 °C): δ = 184.7, 183.1 (s, C=S, mbz), 148.0-144.1 (s, C-N, mbz), 135.6–115.0 (s, Ar) ppm; IR (dichloromethane, cm<sup>-1</sup>):  $\tilde{\nu}$  = 2475 (BH<sub>t</sub>), 1025 (C=S).

*cis*-**7:** *m/z* calculated for [M]<sup>+</sup>: 797.0968, found: 797.0968; <sup>11</sup>B{<sup>1</sup>H} NMR (160 MHz, CDCl<sub>3</sub>, 22 °C): δ = 13.9 (br, 1B) ppm; <sup>1</sup>H NMR (500 MHz, CDCl<sub>3</sub>, 22 °C): 8.22 (d, J = 6.24 Hz, 2H Ar<sub>(mp)</sub>), 7.76 (d, J = 6.52 Hz,

2H Ar<sub>(mp)</sub>), 6.59 (t, J = 6.52 Hz, 2H Ar<sub>(mp)</sub>), 6.44 (t, J = 6.22 Hz, 2H Ar<sub>(mp)</sub>), 6.25 (d, J = 8.08 Hz, 2H Ar<sub>(mp)</sub>), 6.09 (t, J = 6.43 Hz, 2H Ar<sub>(mp)</sub>), 6.17-7.35 (m, 15H, Ar<sub>(phosphine)</sub>), 4.55 (br, B-H<sub>t</sub>), -12.46 (br, 1H, Os-H<sub>b</sub>-B) ppm; <sup>31</sup>P{<sup>1</sup>H} NMR (202 MHz, CDCl<sub>3</sub>, 22 °C): δ = 2.9 (s, 1P) ppm; <sup>13</sup>C{<sup>1</sup>H} NMR (100 MHz, CDCl<sub>3</sub>, 22 °C): δ = 197.8, 182.2, 182.1 (s, C=S, mp), 150.1-143.5 (s, C-N, mp), 134.3-114.4 (s, Ar) ppm; IR (dichloromethane, cm<sup>-1</sup>):  $\tilde{\nu}$  = 2572 (BH<sub>t</sub>), 1110 (C=S).

## II.2 Spectroscopic details

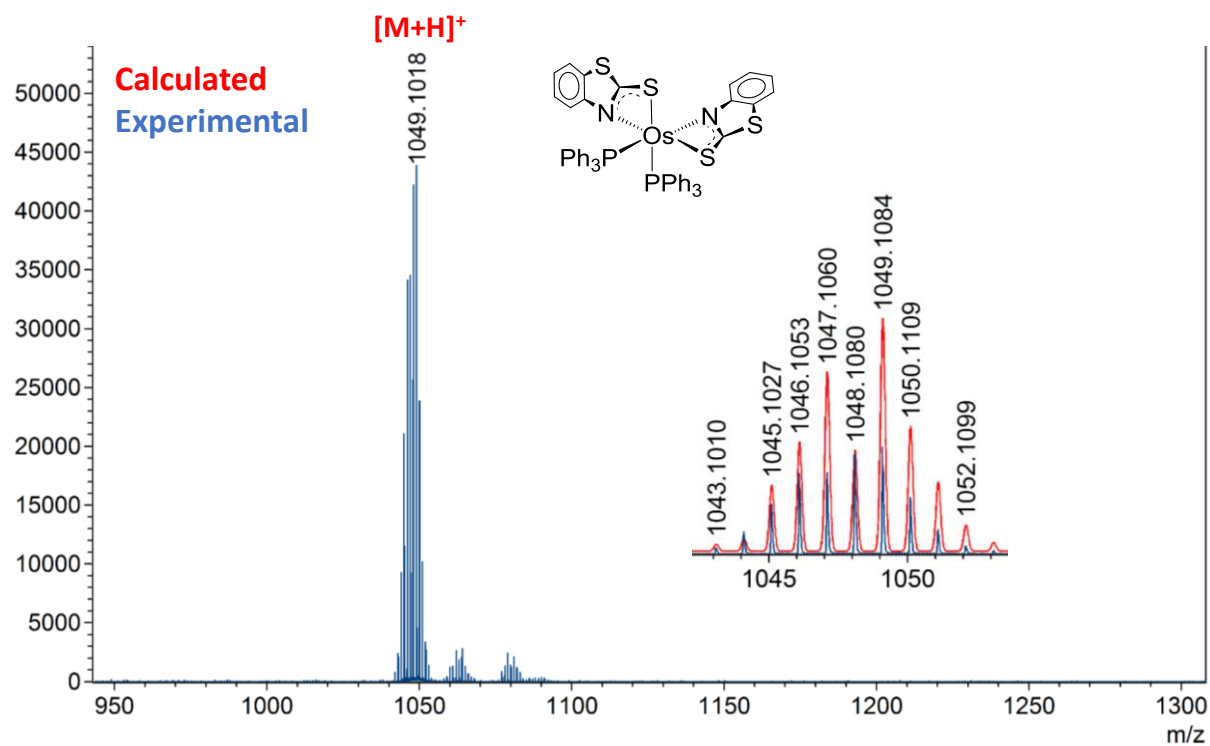

Figure S2. ESI-MS spectrum of **2a**.

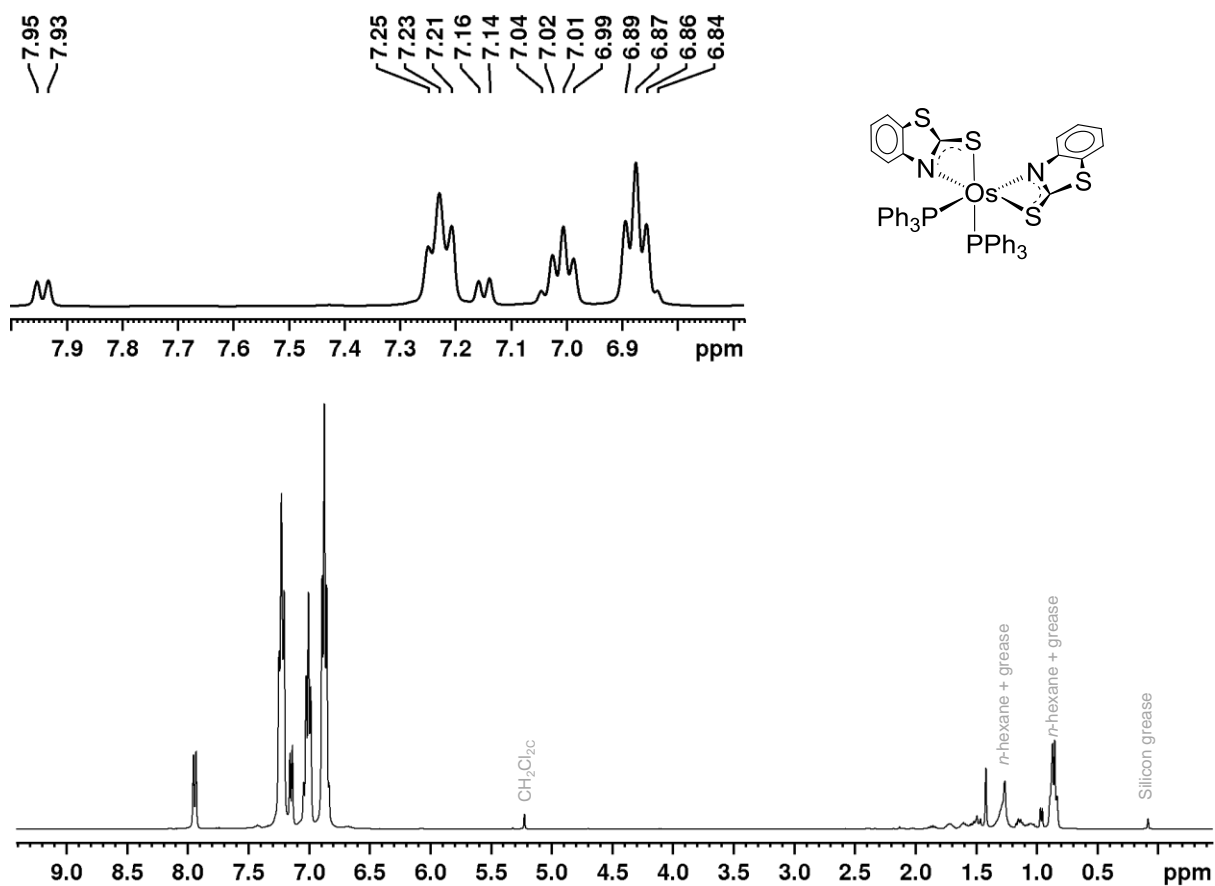

Figure S3.  $^1\text{H}$  NMR spectrum of **2a** in  $\text{CDCl}_3$ .

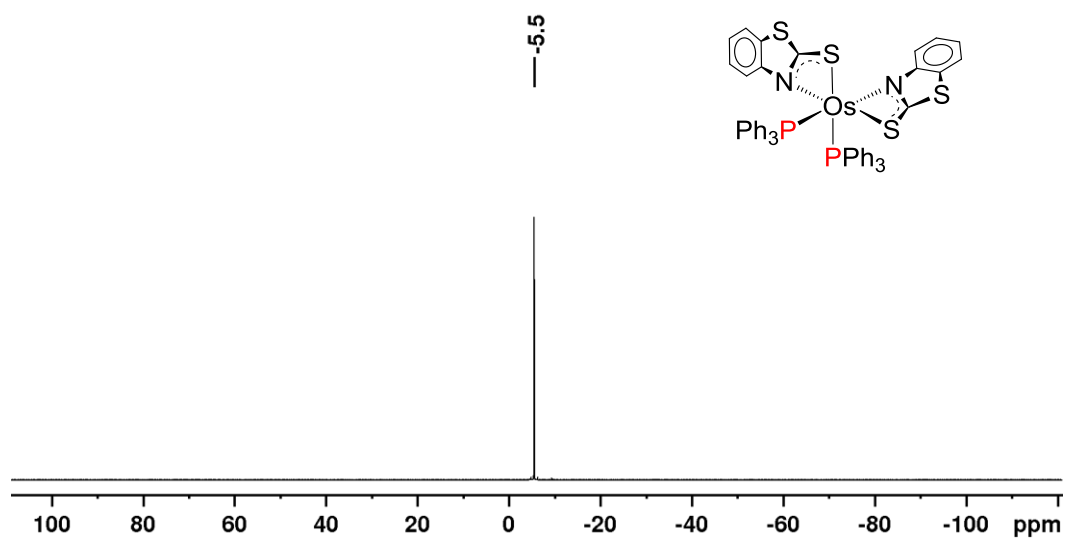

Figure S4.  $^{31}\text{P}\{^1\text{H}\}$  NMR spectrum of **2a** in  $\text{CDCl}_3$ .

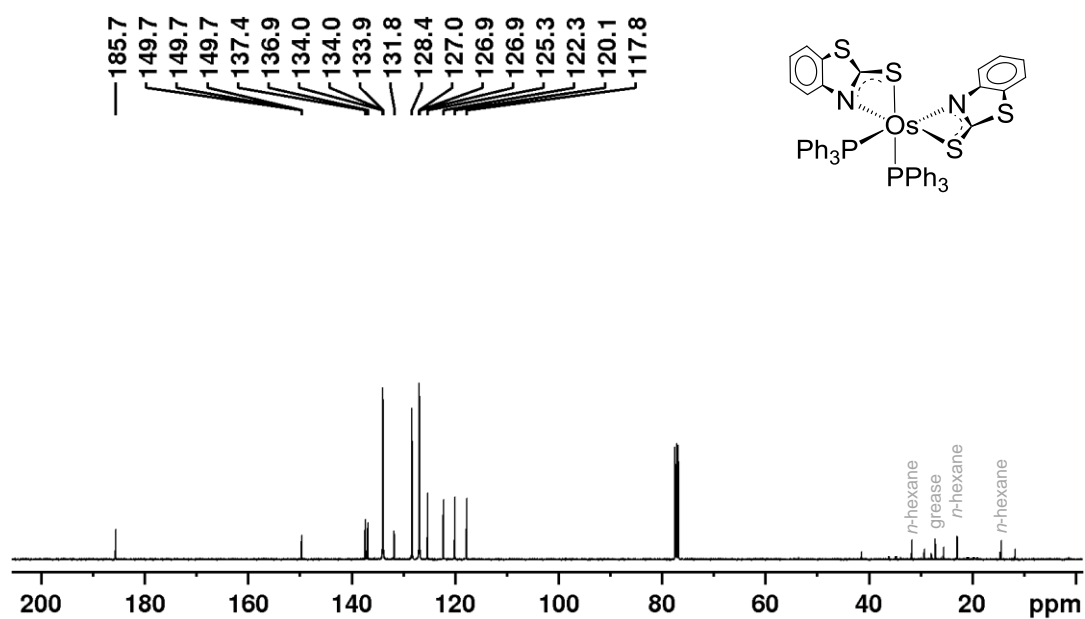

Figure S5.  $^{13}\text{C}\{^1\text{H}\}$  NMR spectrum of **2a** in  $\text{CDCl}_3$ .

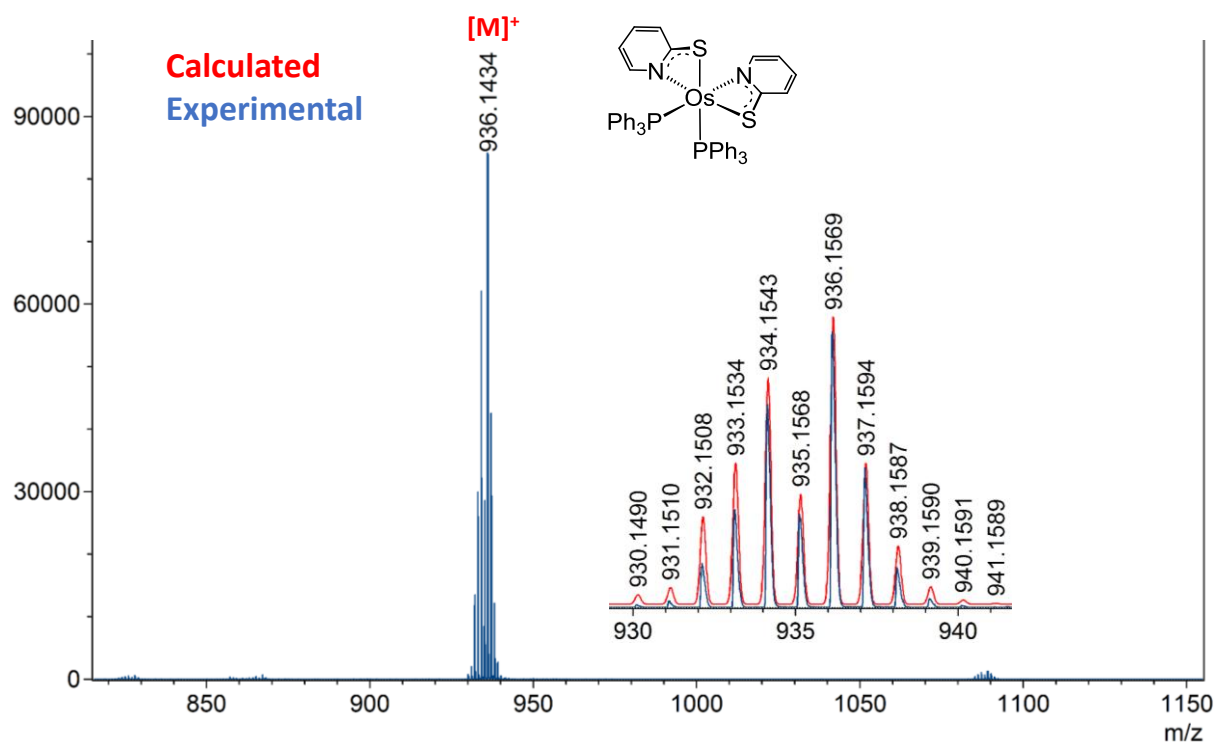

Figure S6. ESI-MS spectrum of **2b**.

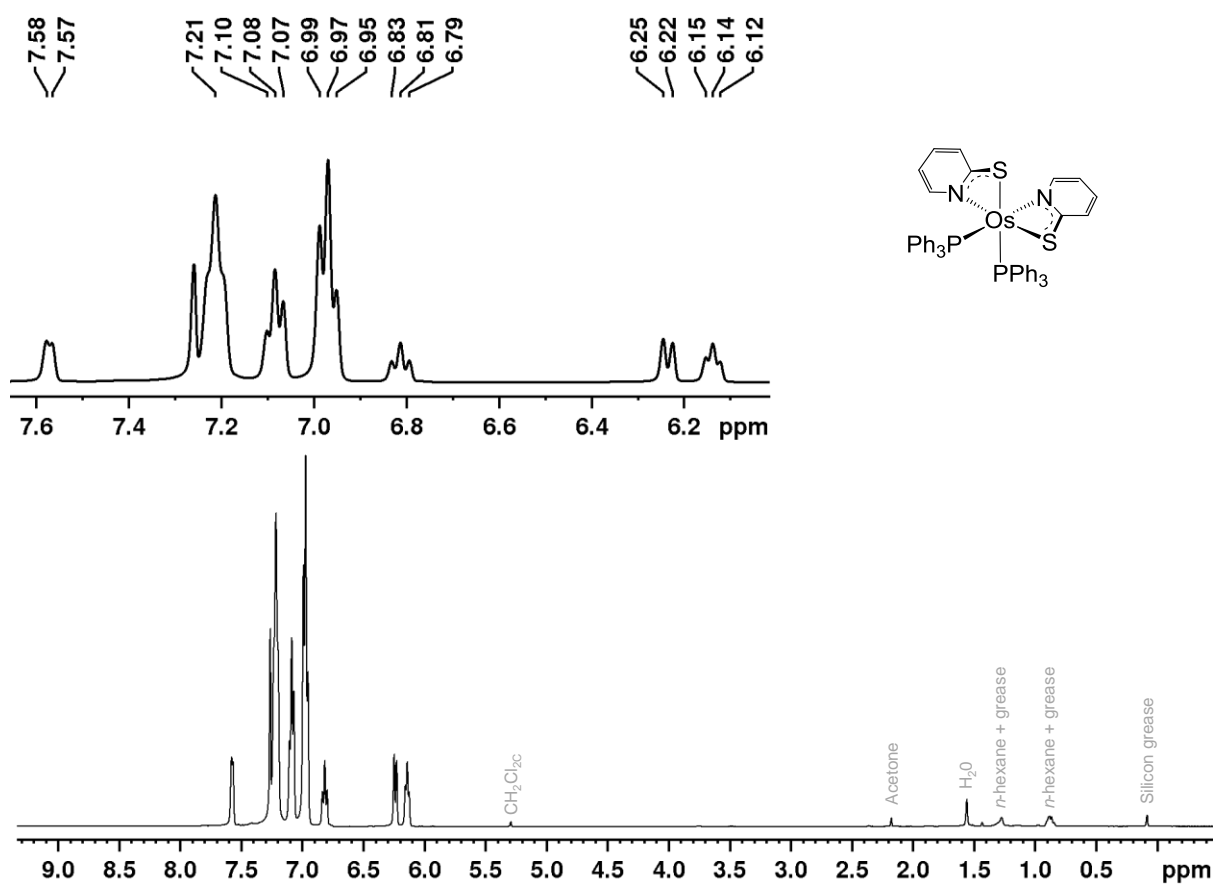

Figure S7. <sup>1</sup>H NMR spectrum of **2b** in CDCl<sub>3</sub>.

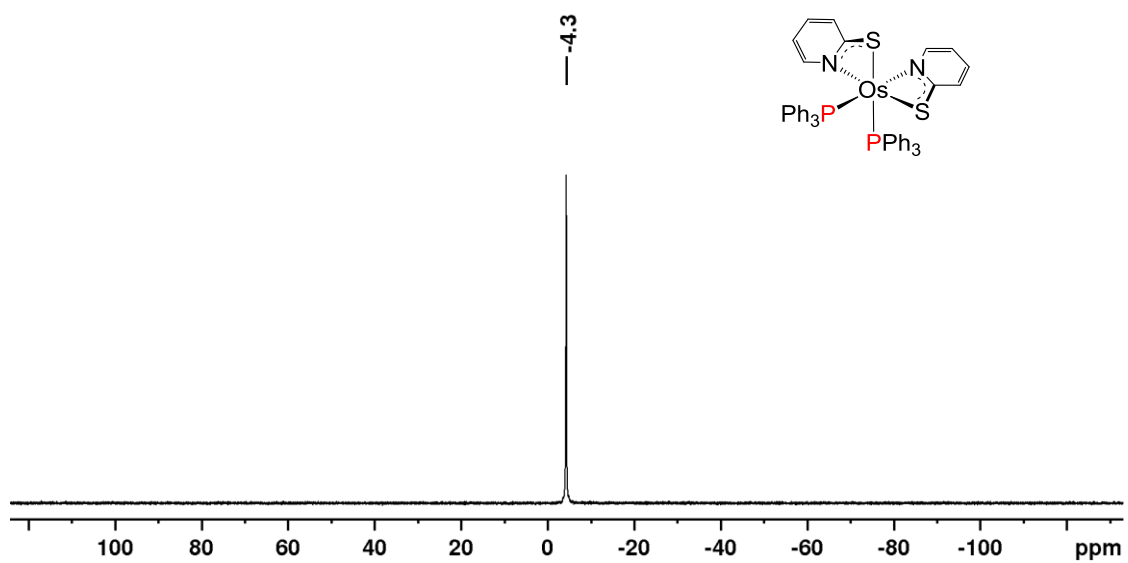

Figure S8.  $^{31}\text{P}\{^1\text{H}\}$  NMR spectrum of **2b** in  $\text{CDCl}_3$ .

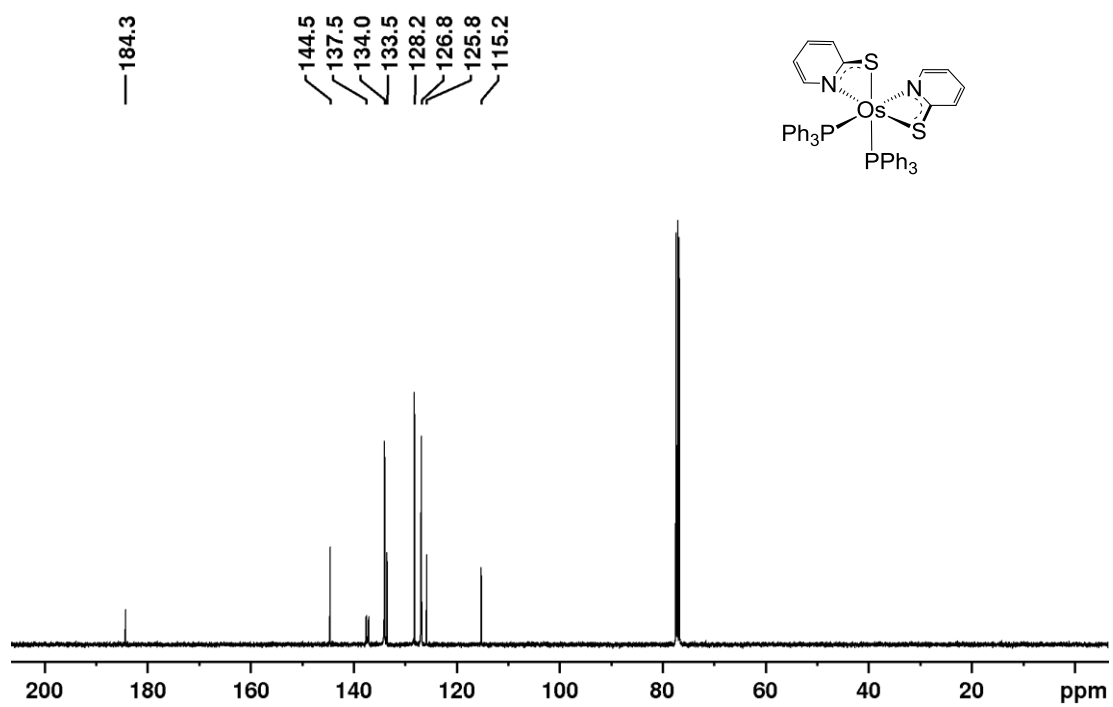

Figure S9.  $^{13}\text{C}\{^1\text{H}\}$  NMR spectrum of **2b** in  $\text{CDCl}_3$ .

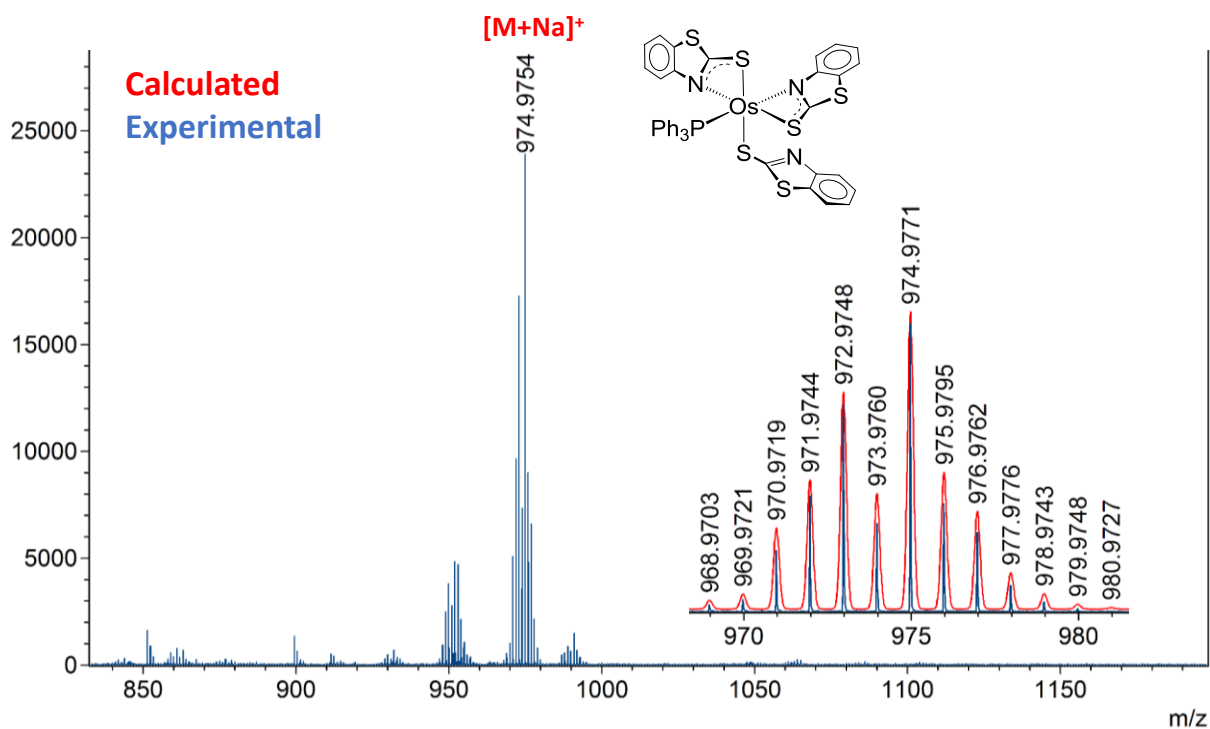

Figure S10. ESI-MS spectrum of **3a**.

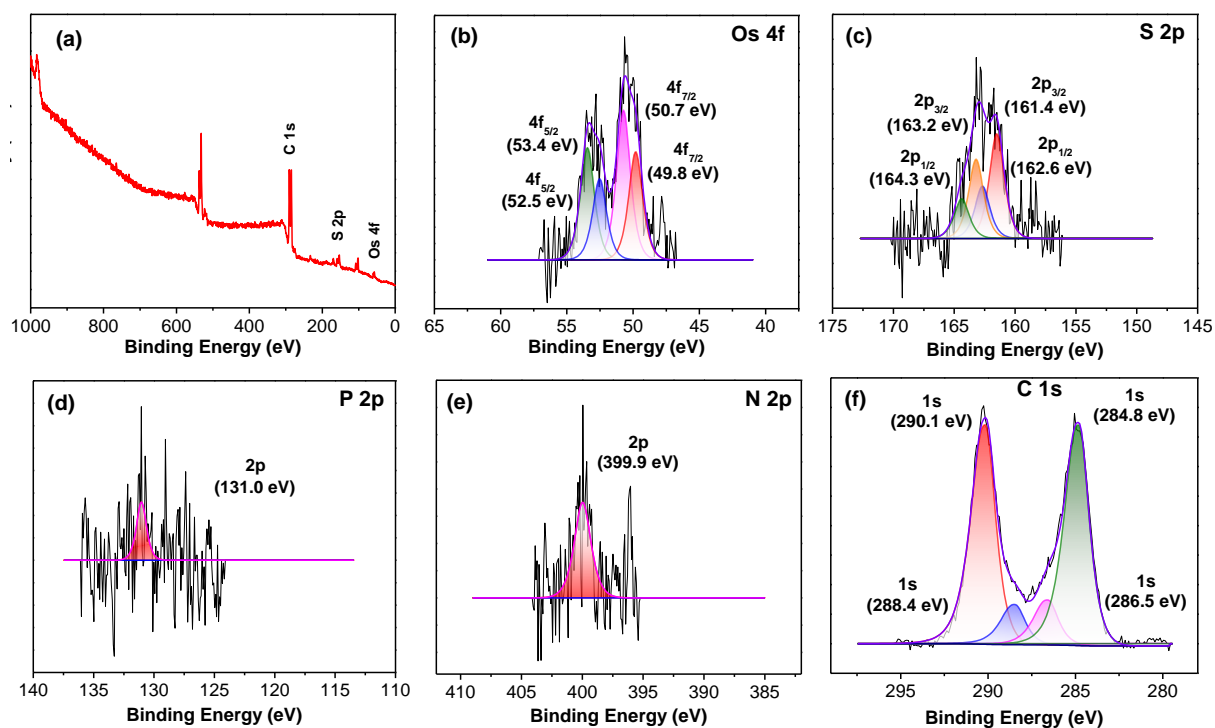

Figure S11. (a) XPS survey spectrum of **3a** and elemental spectrum of Os(b), S(c), P(d), N(e) and C(f).

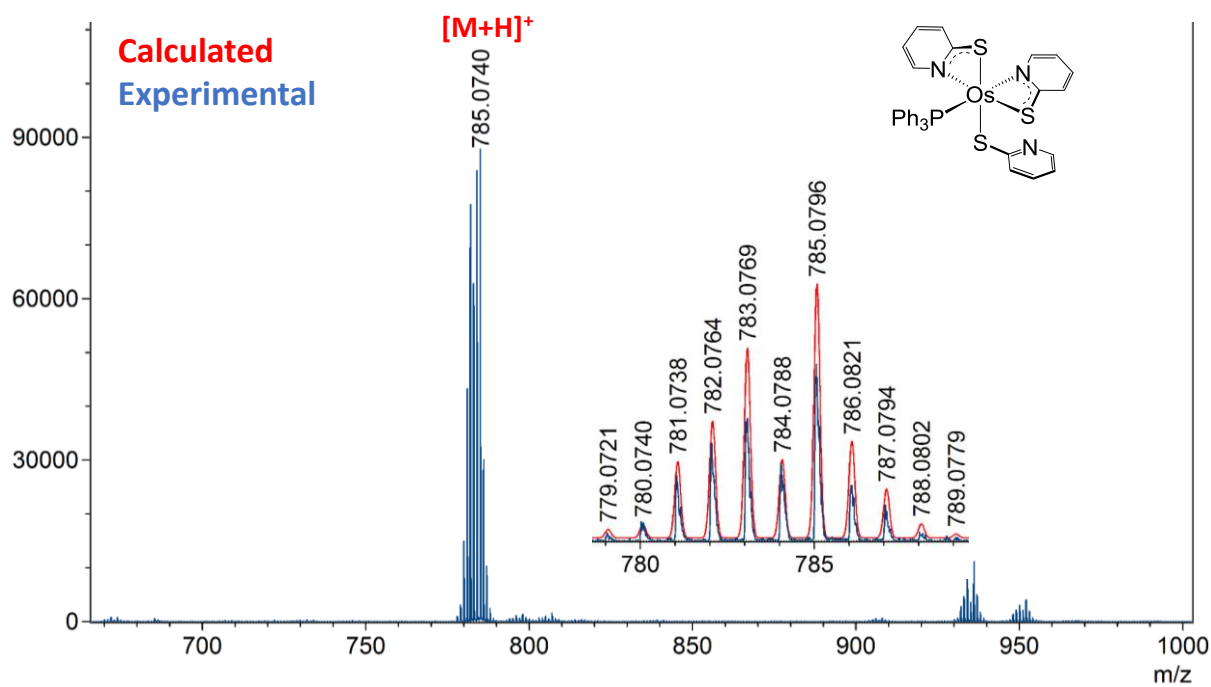

Figure S12. ESI-MS spectrum of **3b**.

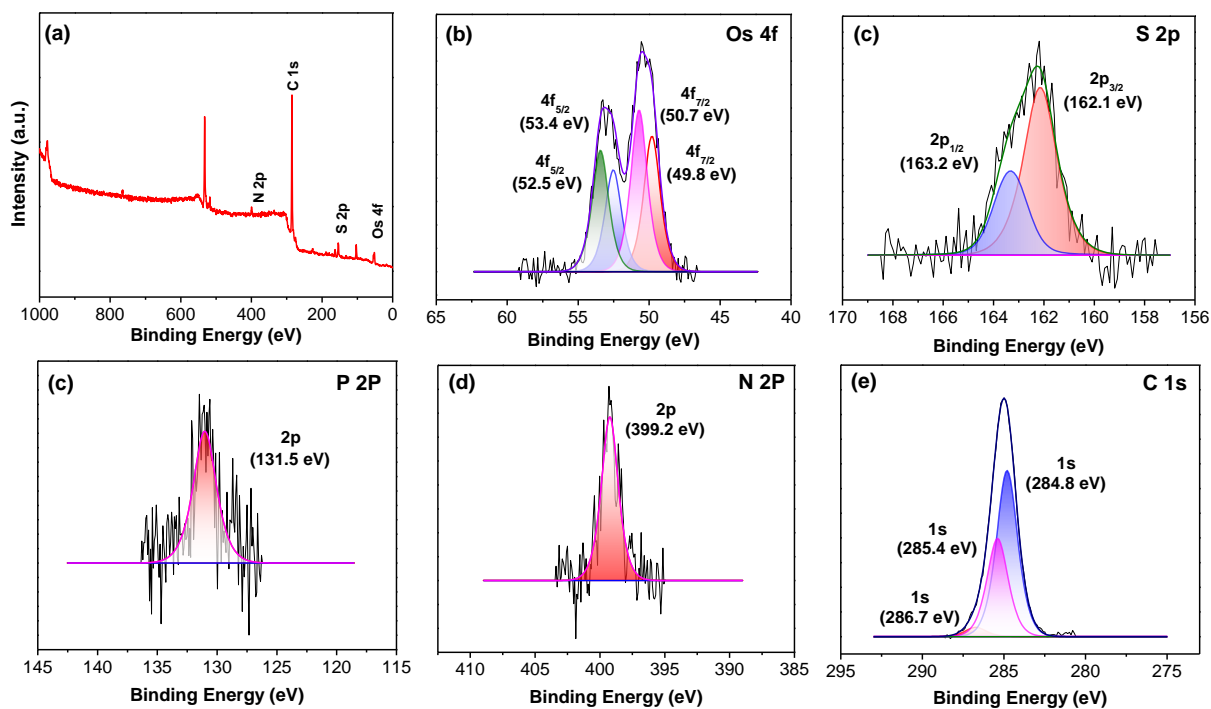

Figure S13. (a) XPS survey spectrum of **3b** and elemental spectrum of Os(b), S(c), P(d), N(e) and C(f).



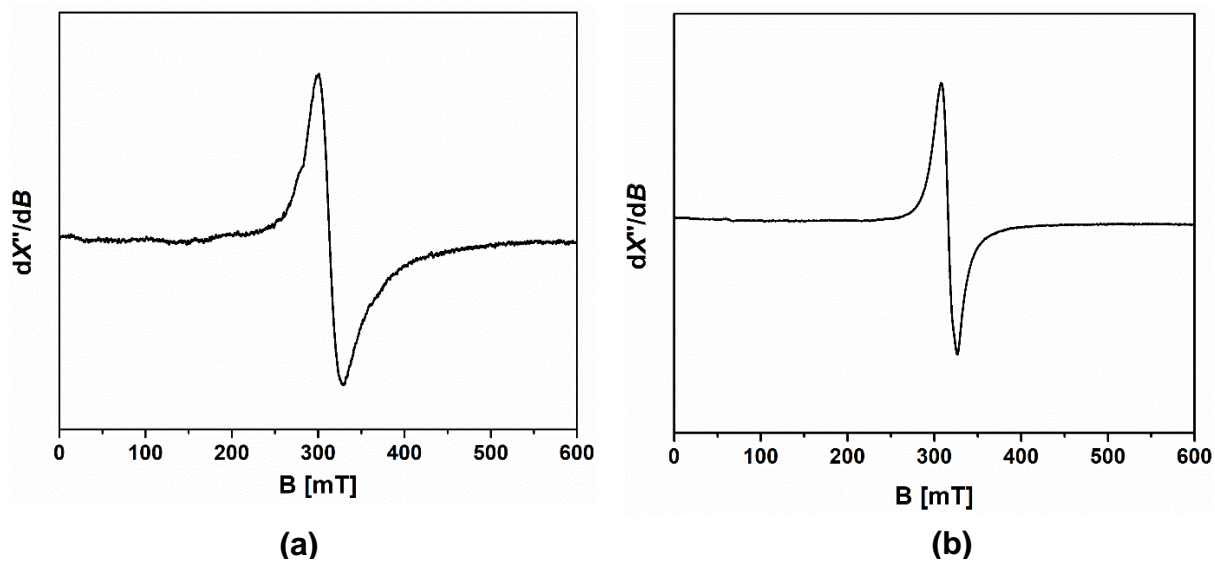

Figure S14. EPR spectrum of **3a** (a) and **3b** (b).

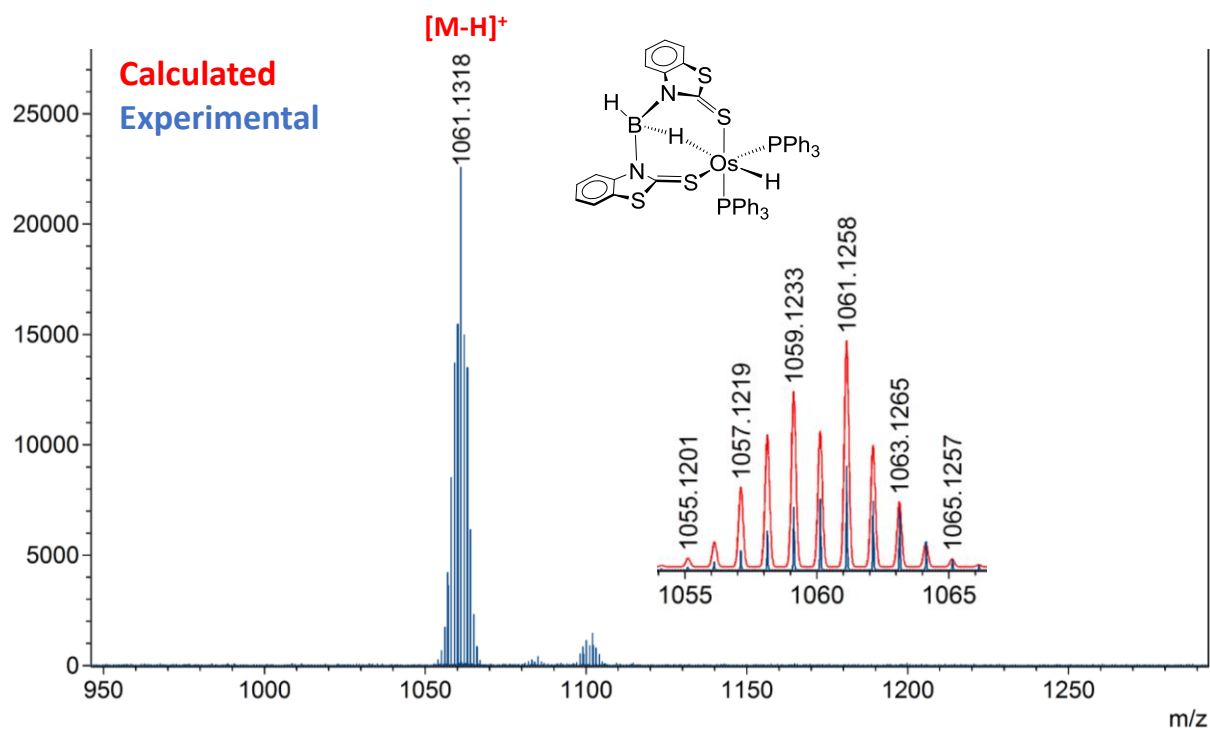

Figure S15. ESI-MS spectrum of **4a**.

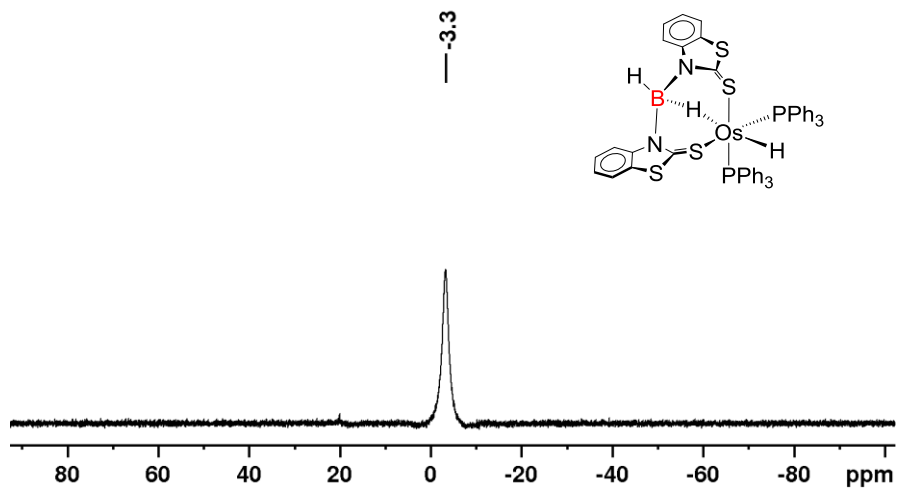

Figure S16.  $^{11}\text{B}\{^1\text{H}\}$  NMR spectrum of **4a** in  $\text{CDCl}_3$ .

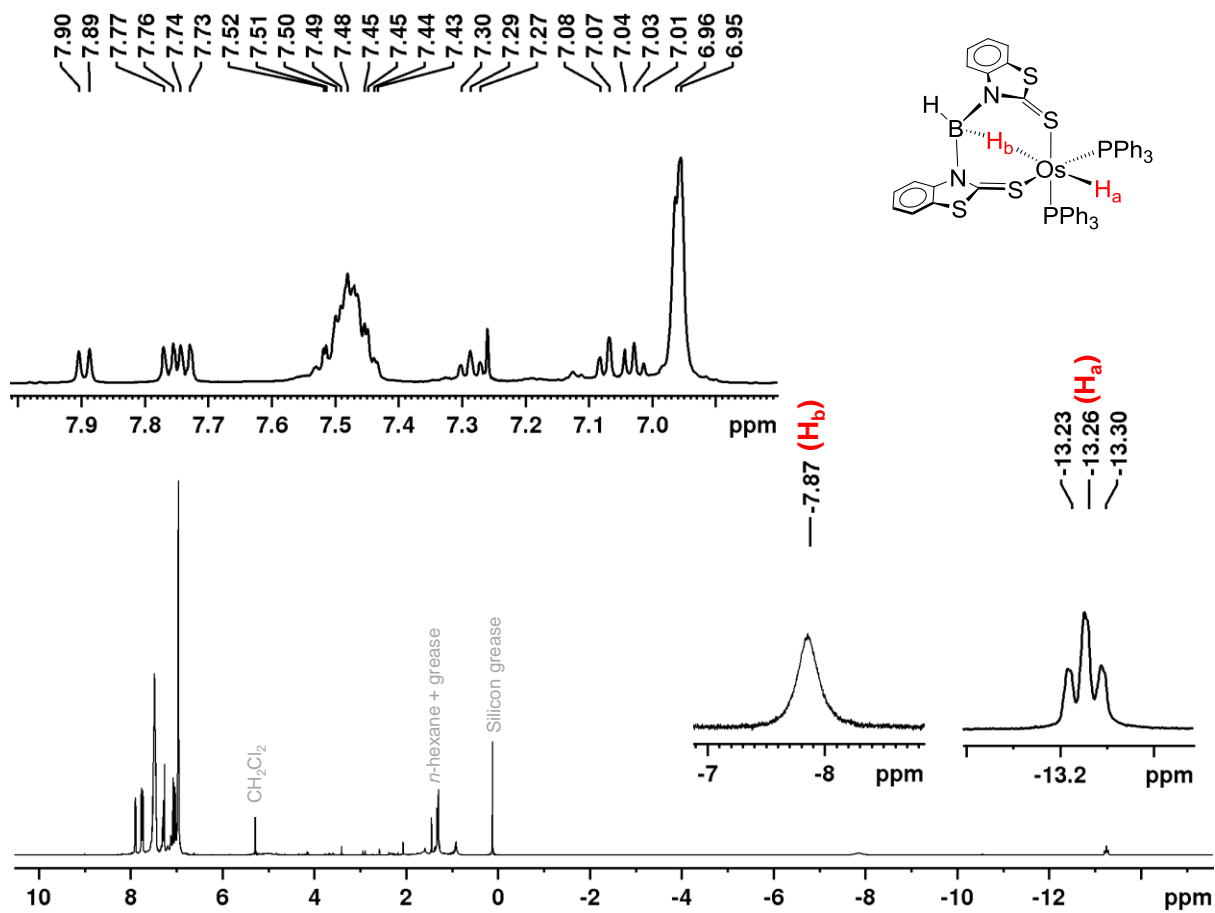

Figure S17.  $^1\text{H}$  NMR spectrum of **4a** in  $\text{CDCl}_3$ .

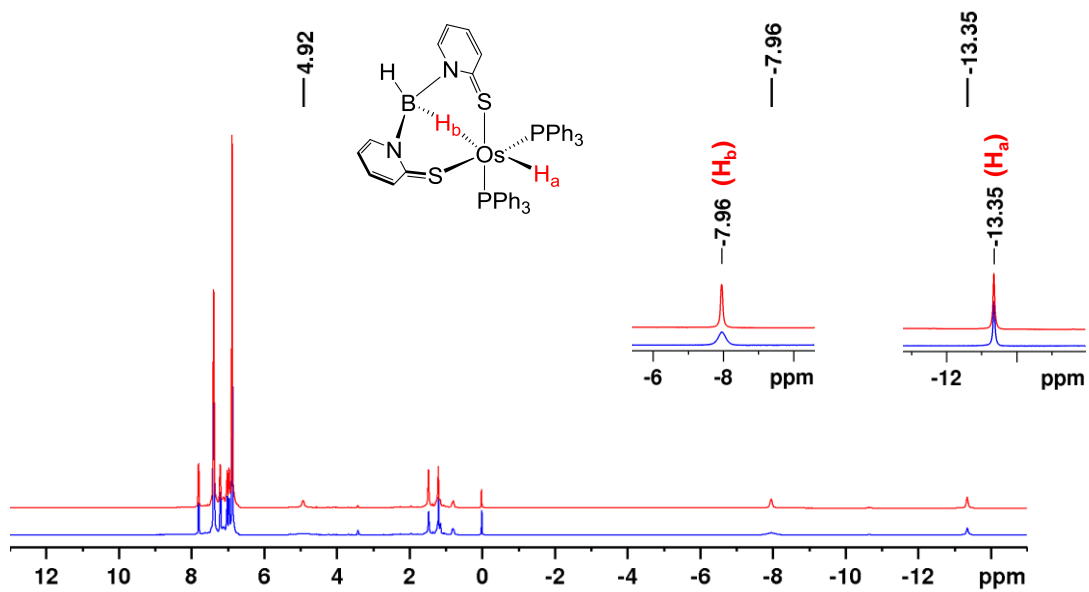

Figure S18. Stacked  $^1\text{H}$  (blue) and  $^1\text{H}\{^{11}\text{B}\}$  (red) NMR spectrum of **4a** in  $\text{CDCl}_3$

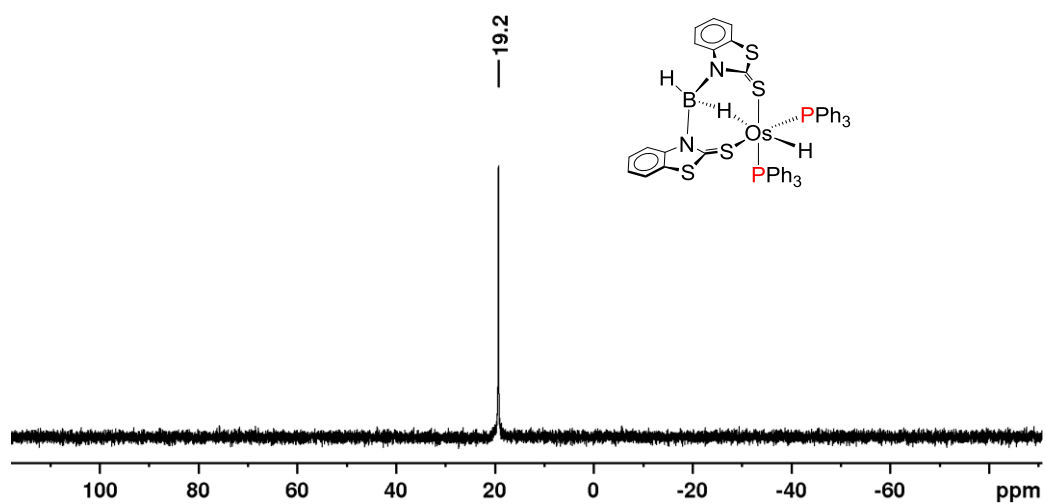

Figure S19.  $^{31}\text{P}\{^1\text{H}\}$  NMR spectrum of **4a** in  $\text{CDCl}_3$ .

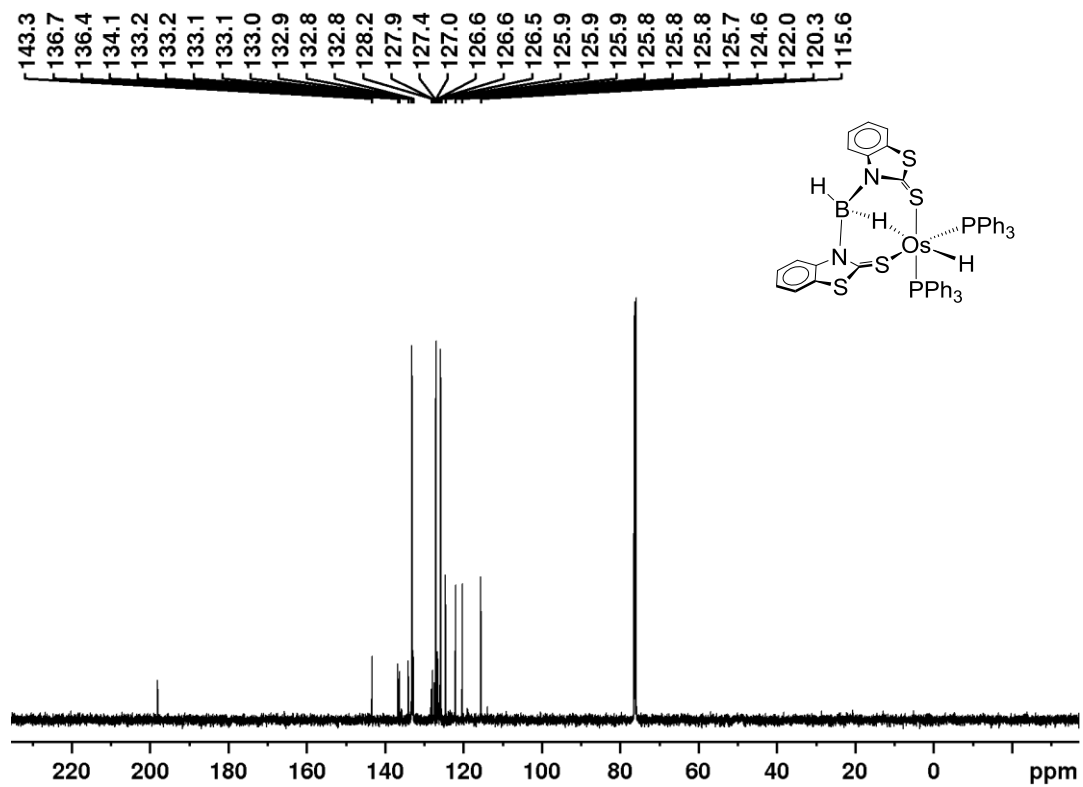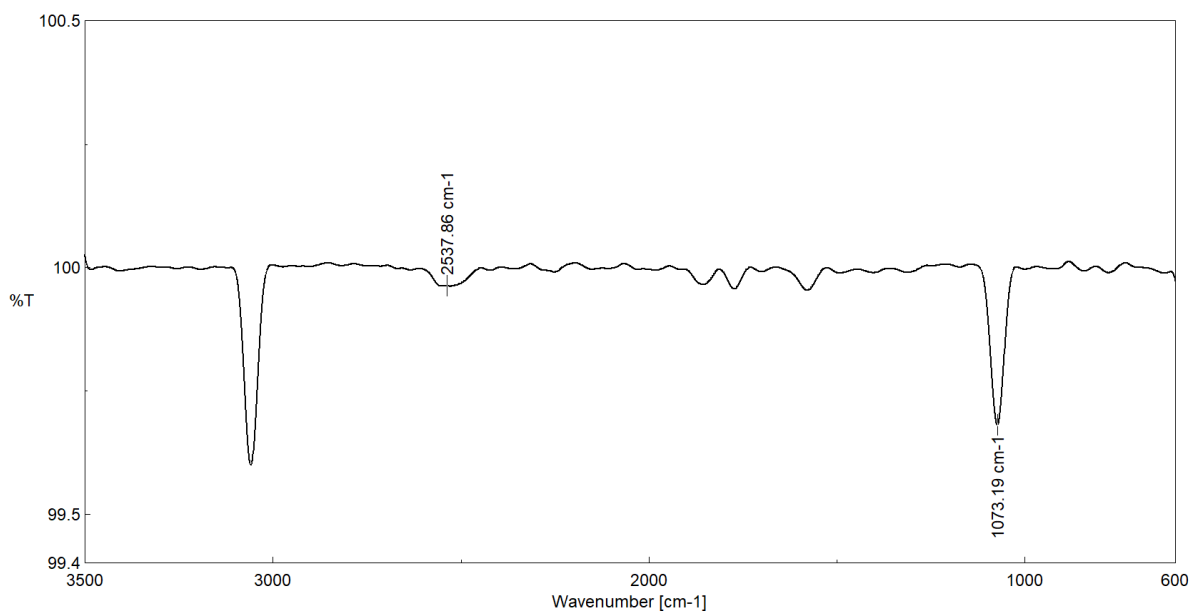

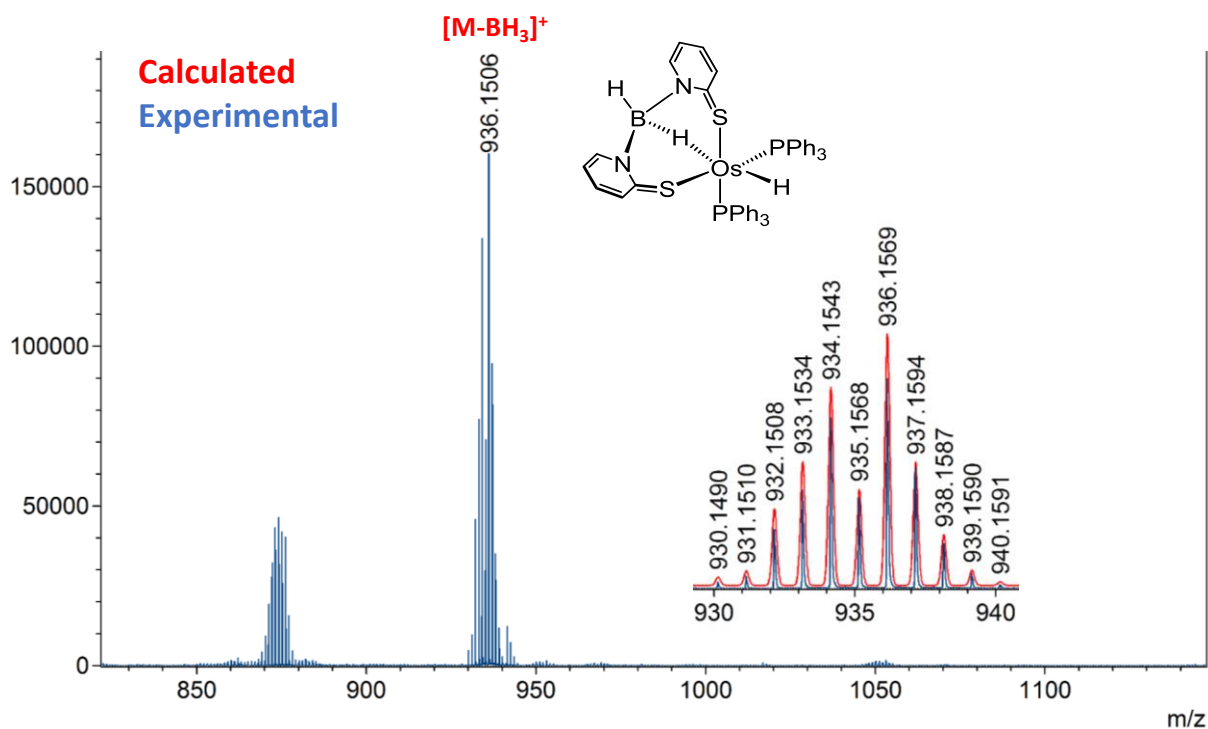

Figure S22. ESI-MS spectrum of **4b**.

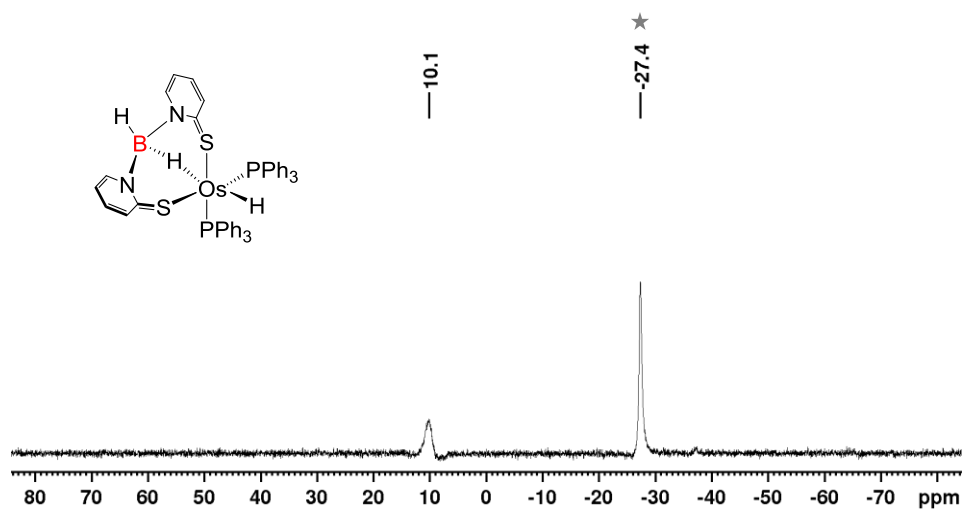

Figure S23.  $^{11}B\{^1H\}$  NMR spectrum of **4b** in  $CDCl_3$ . (\*inseparable impurity, which might appear due to the formation of mercaptopyridine-borane adduct)

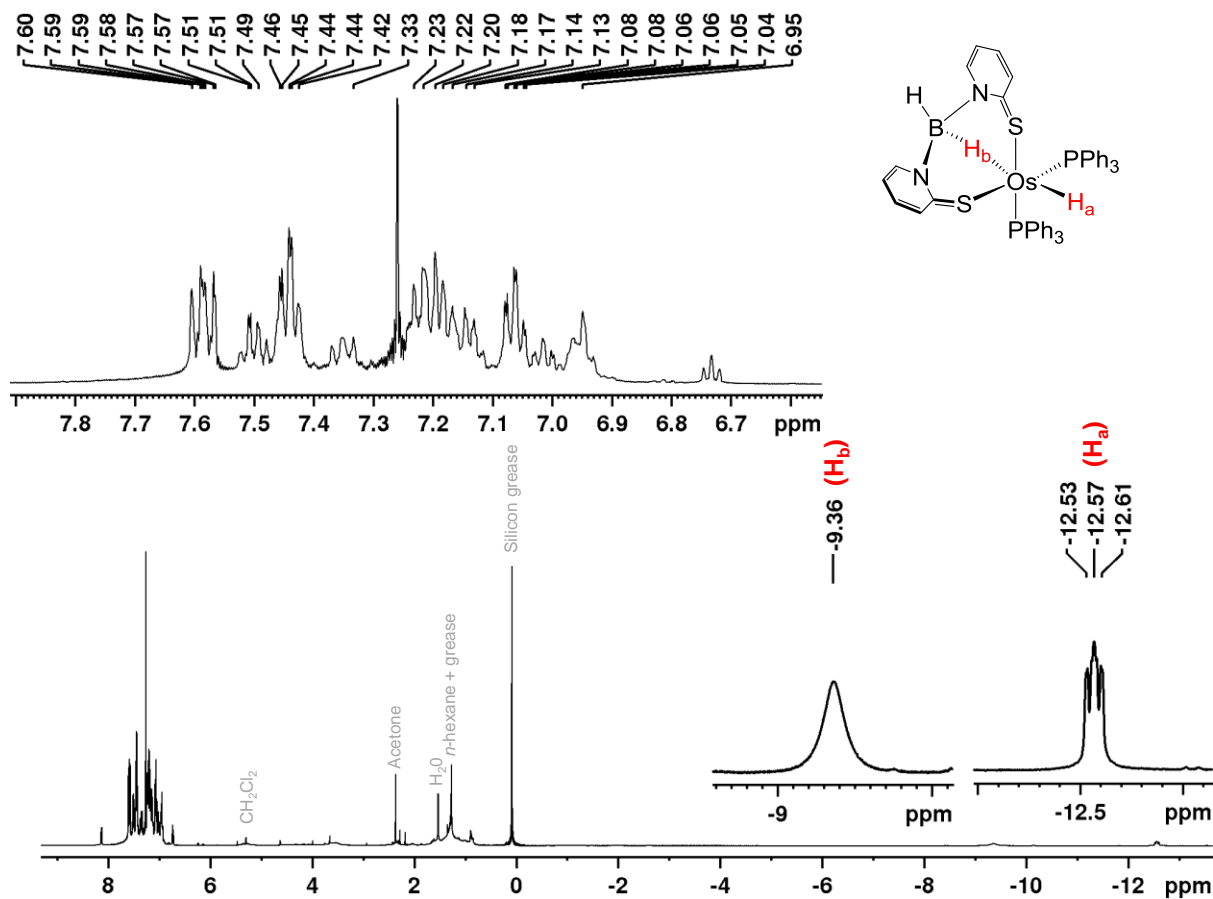

Figure S24.  $^1\text{H}$  NMR spectrum of **4b** in  $\text{CDCl}_3$ .

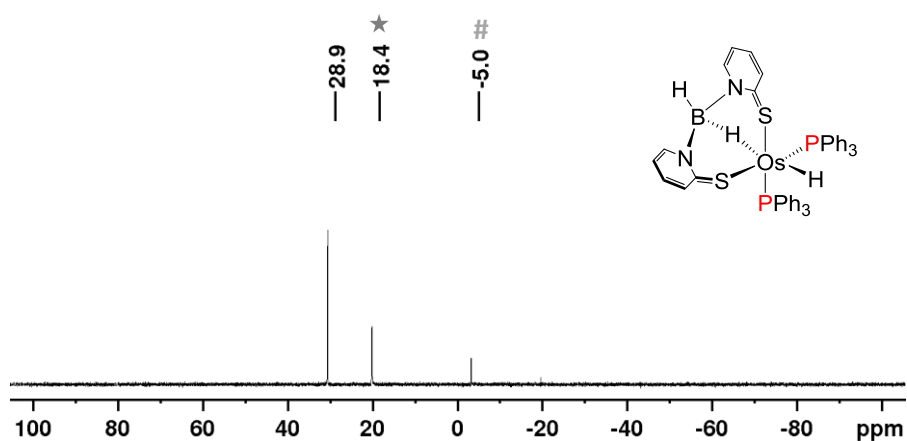

Figure S25.  $^{31}\text{P}\{^1\text{H}\}$  NMR spectrum of **4b** in  $\text{CDCl}_3$ . ( $\star$  inseparable impurity, which might appear due to the formation of mercaptopyridine-borane adduct;  $\#$  free  $\text{PPh}_3$ )

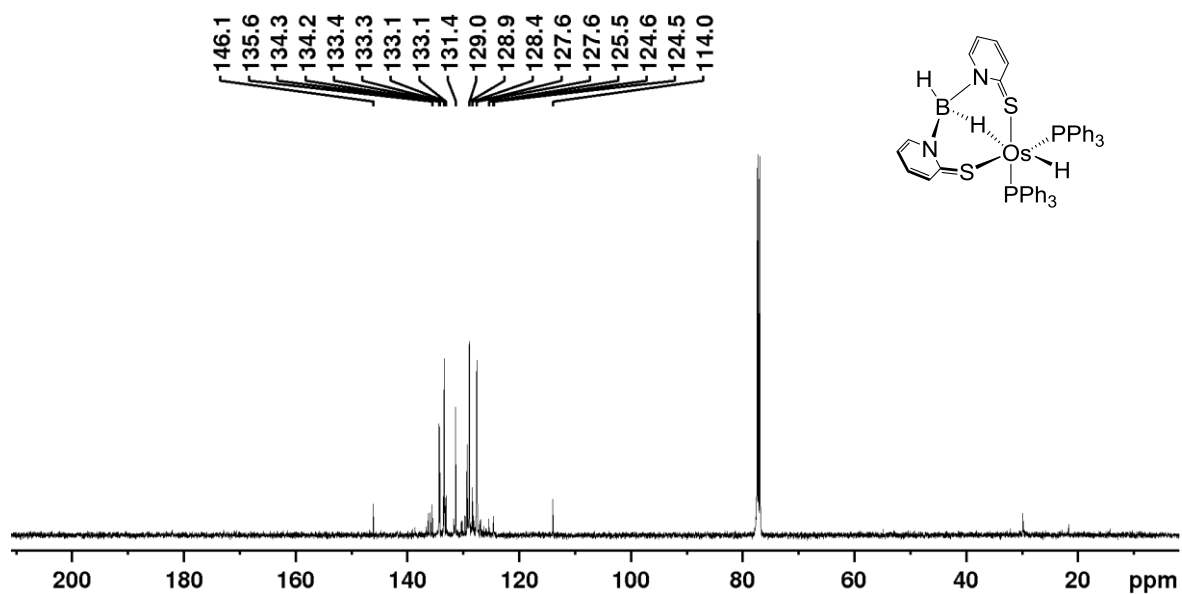

Figure S26.  $^{13}\text{C}\{^1\text{H}\}$  NMR spectrum of **4b** in  $\text{CDCl}_3$ .

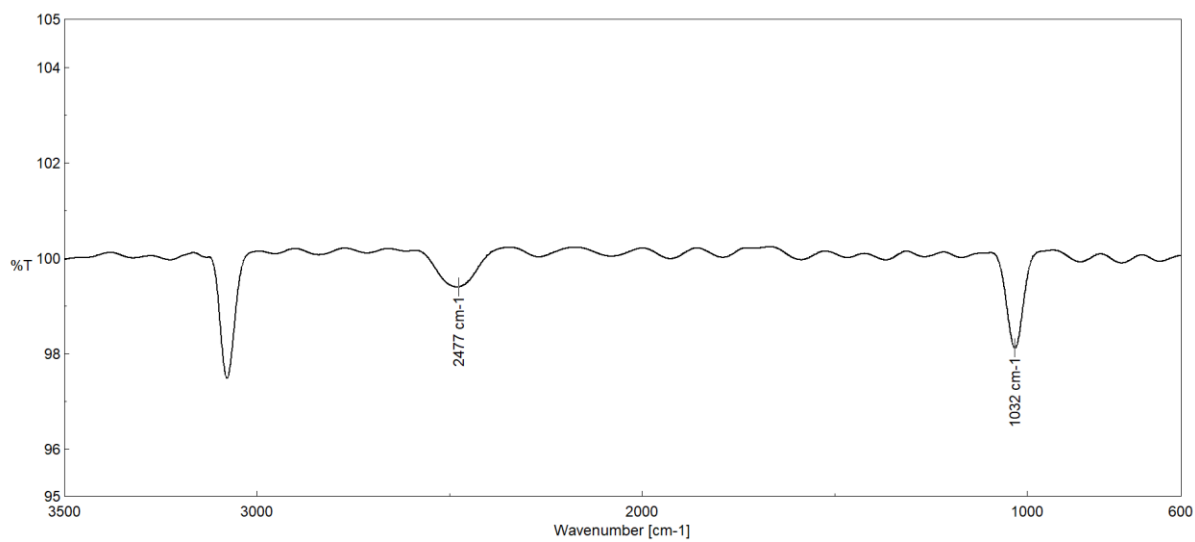

Figure S27. IR spectrum of **4b** in  $\text{CH}_2\text{Cl}_2$ .

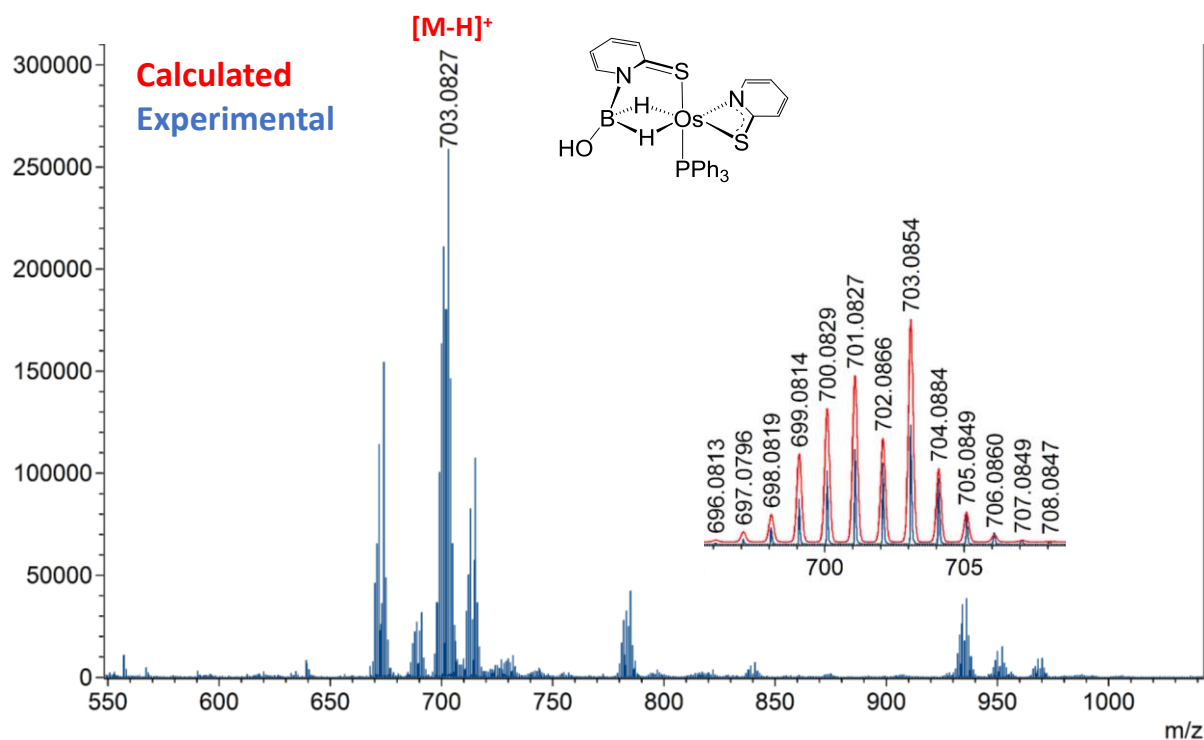

Figure S28. ESI-MS spectrum of 5.

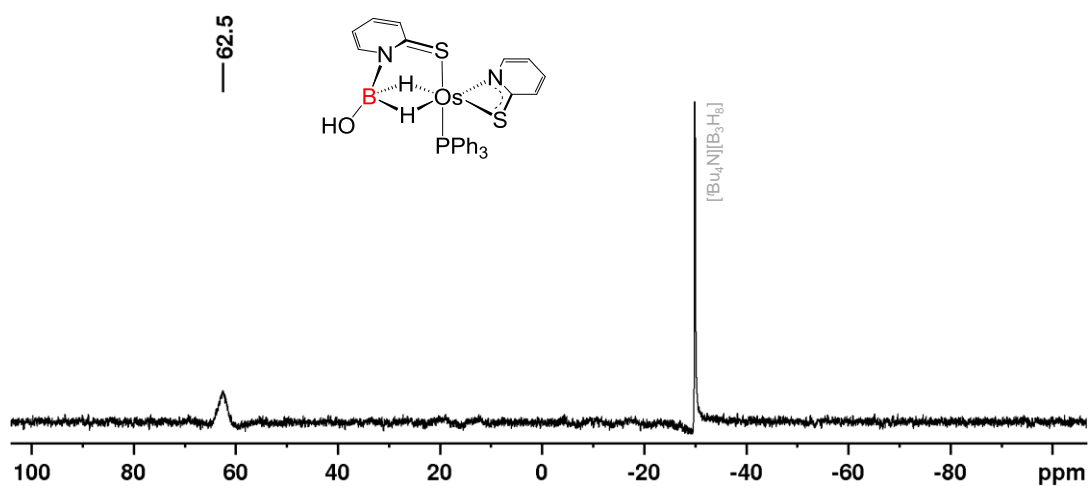

Figure S29.  $^{11}\text{B}\{^1\text{H}\}$  NMR spectrum of 5 in  $\text{CDCl}_3$ .



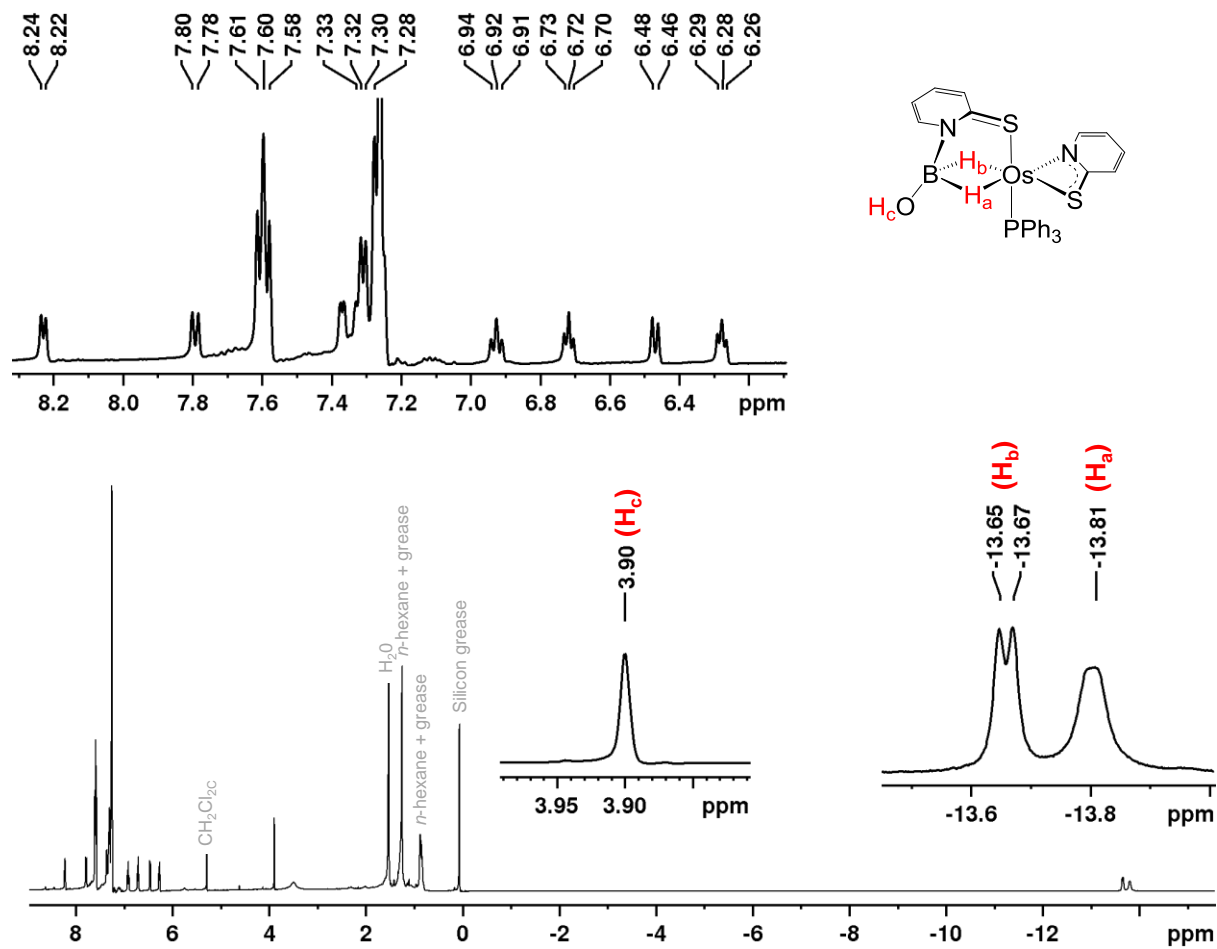

Figure S30. <sup>1</sup>H NMR spectrum of 5 in CDCl<sub>3</sub>.

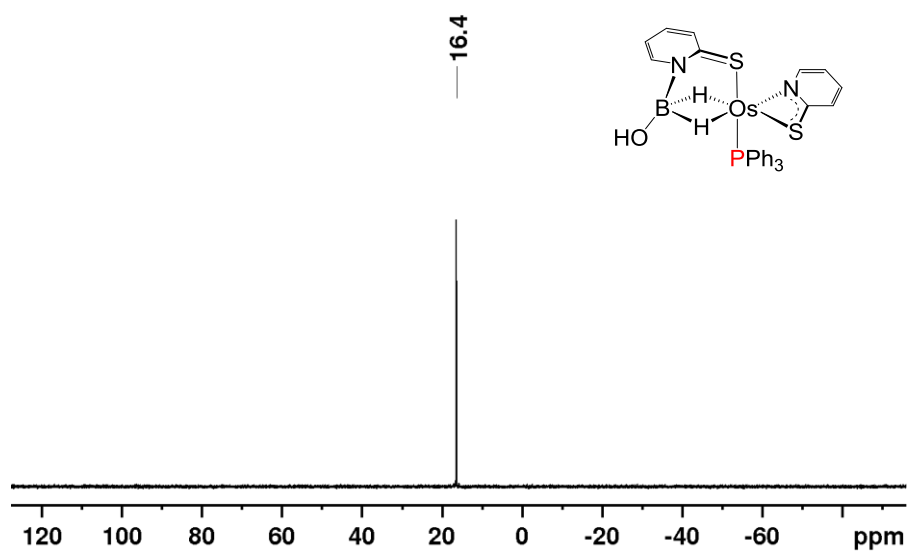

Figure S31. <sup>31</sup>P{<sup>1</sup>H} NMR spectrum of 5 in CDCl<sub>3</sub>.

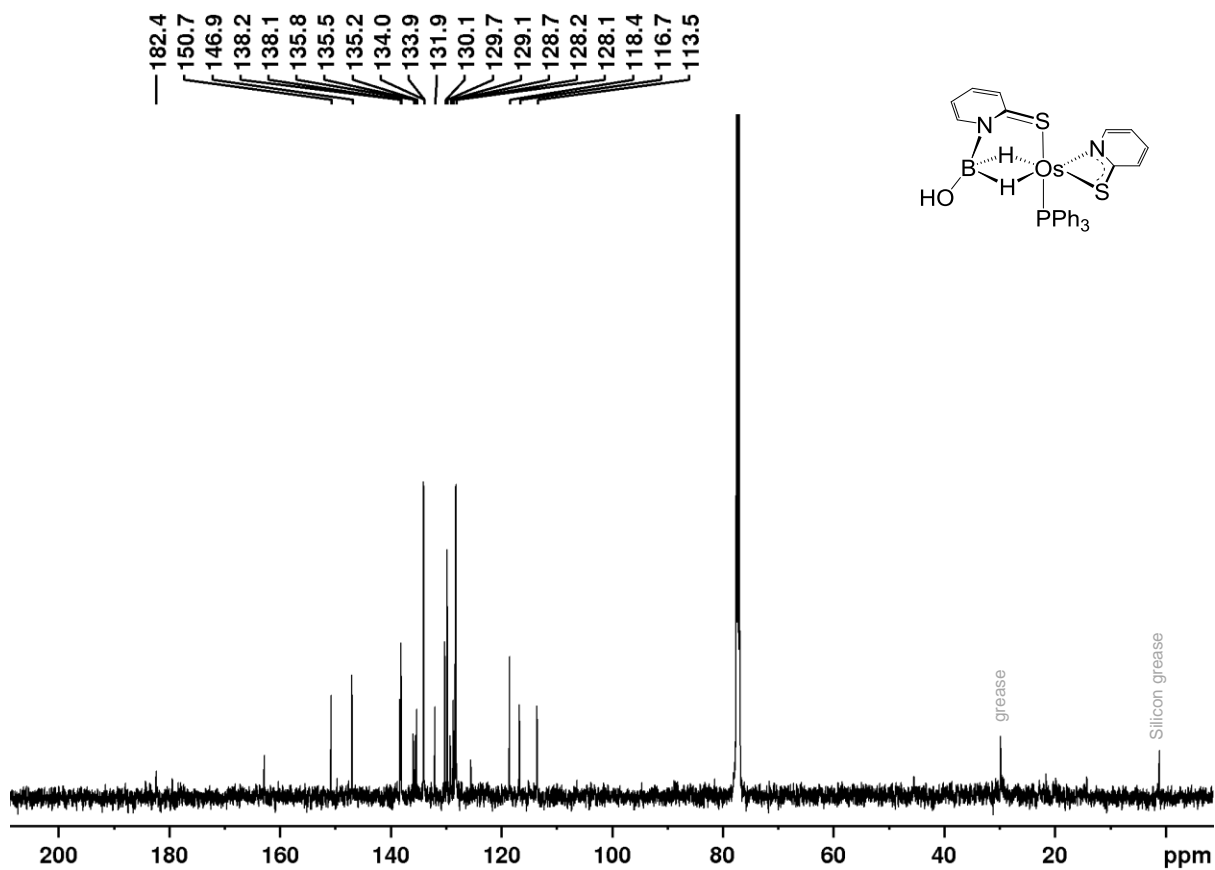

Figure S32.  $^{13}\text{C}\{^1\text{H}\}$  NMR spectrum of **5** in  $\text{CDCl}_3$ .

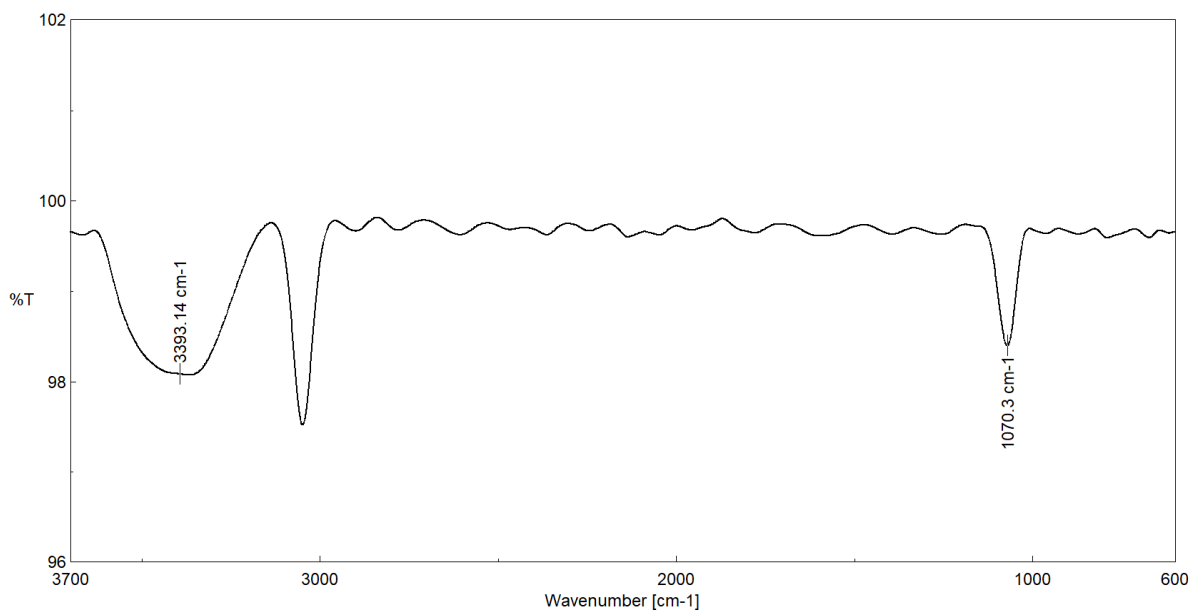

Figure S33. IR spectrum of **5** in  $\text{CH}_2\text{Cl}_2$ .

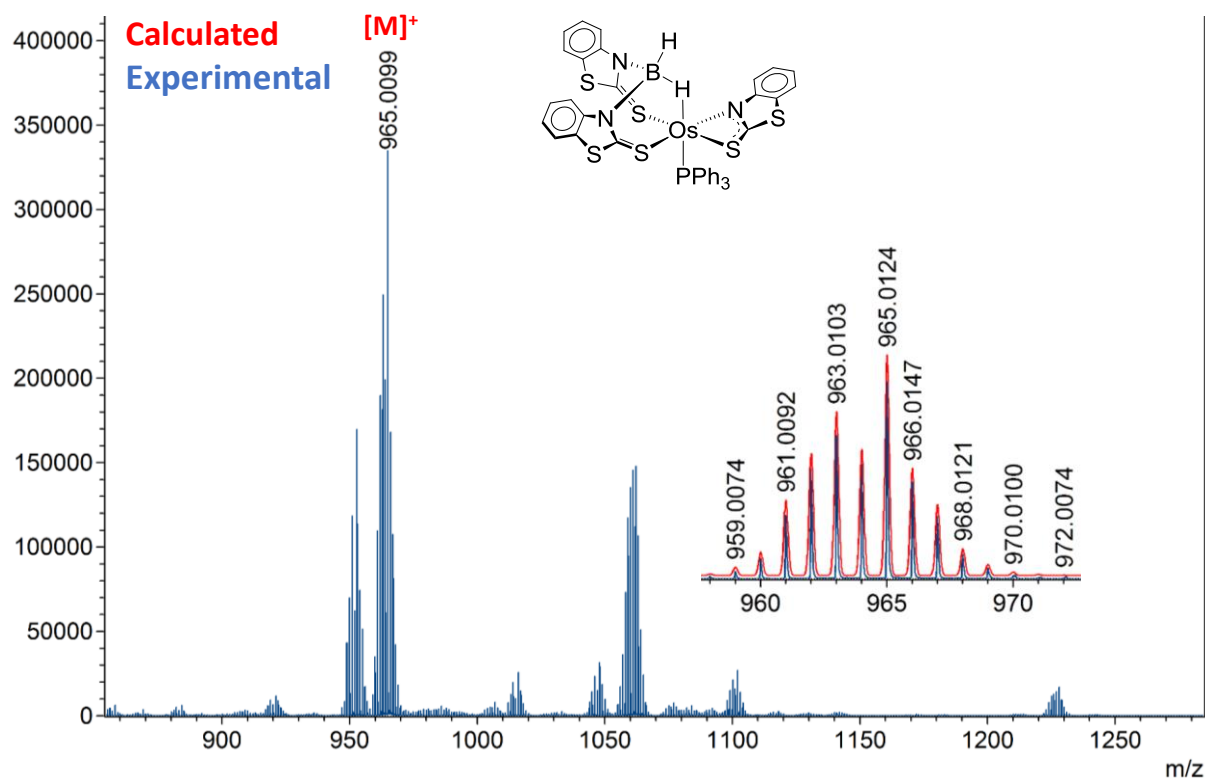

Figure S34. ESI-MS spectrum of *trans-6*.

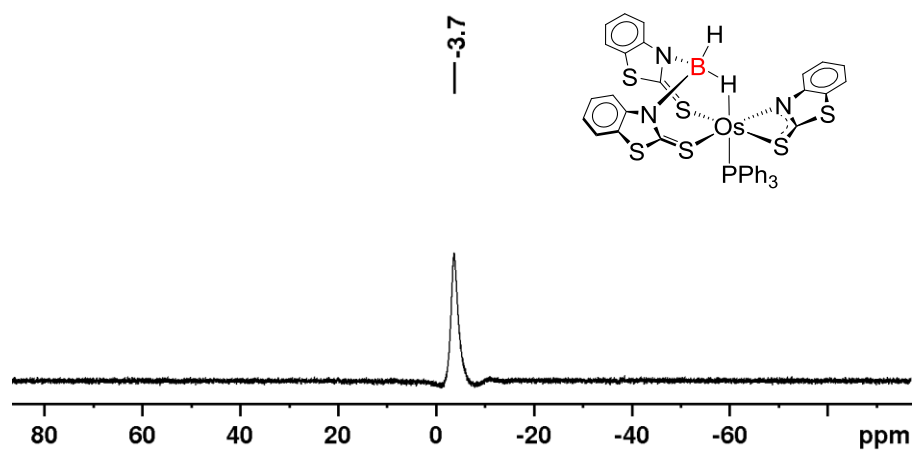

Figure S35.  $^{11}\text{B}\{^1\text{H}\}$  NMR spectrum of *trans-6* in  $\text{CDCl}_3$ .

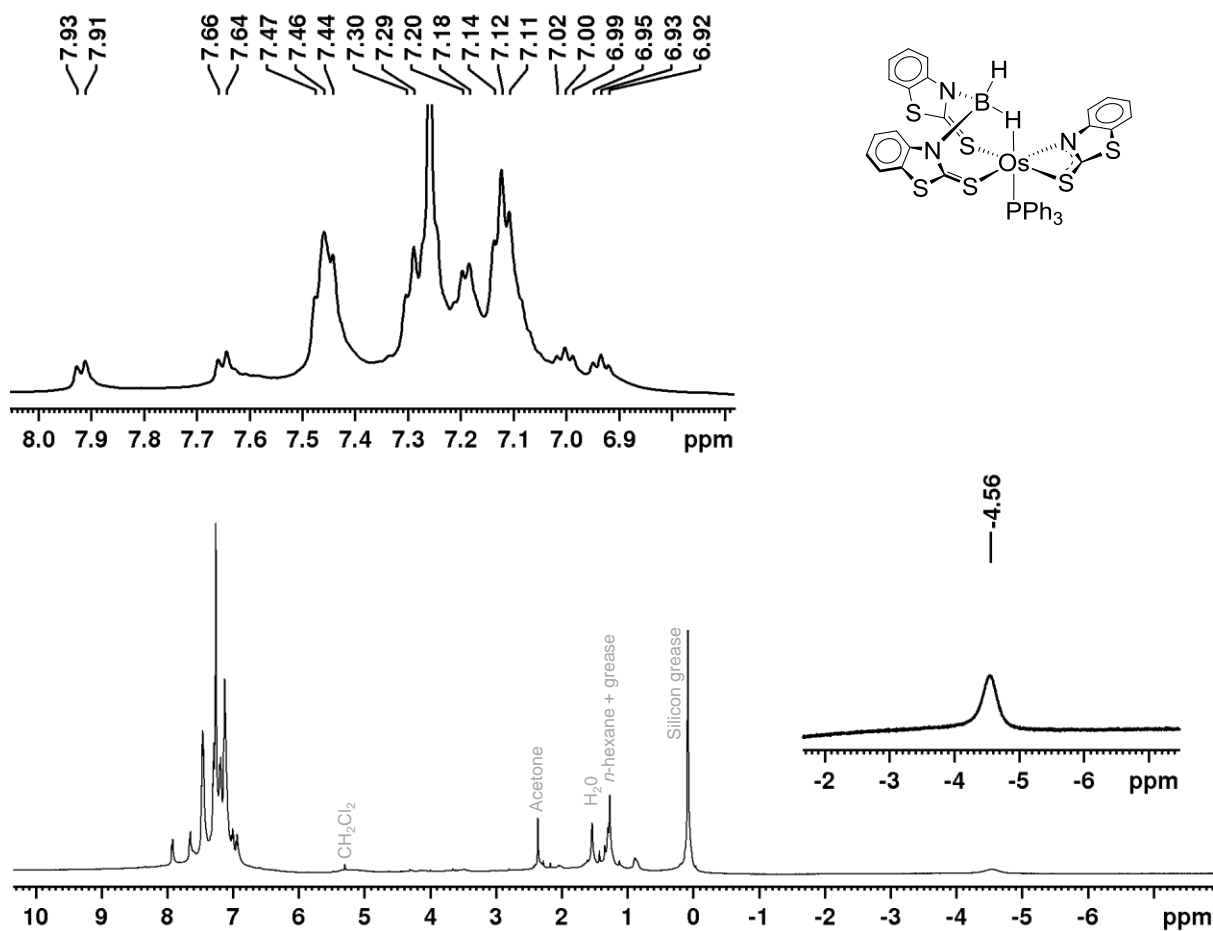

Figure S36.  $^1\text{H}$  NMR spectrum of *trans*-6 in  $\text{CDCl}_3$ .

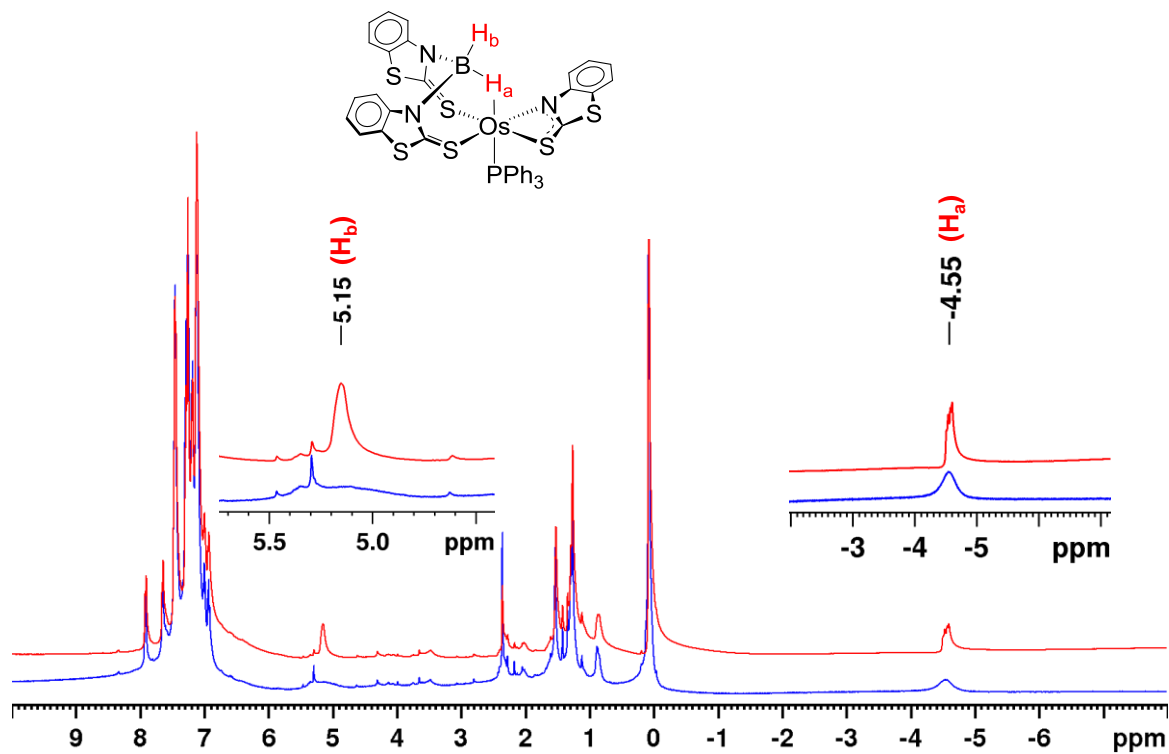

Figure S37. Stacked  $^1\text{H}$  (blue) and  $^1\text{H}\{^{11}\text{B}\}$  (red) NMR spectrum of *trans*-6 in  $\text{CDCl}_3$ .

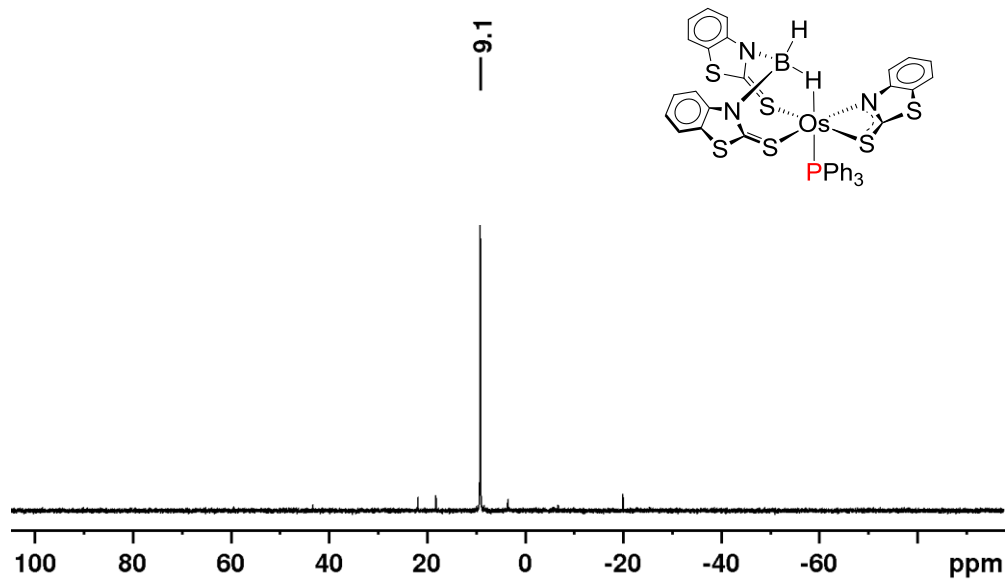

Figure S38.  $^{31}\text{P}\{^1\text{H}\}$  NMR spectrum of *trans*-6 in  $\text{CDCl}_3$ .

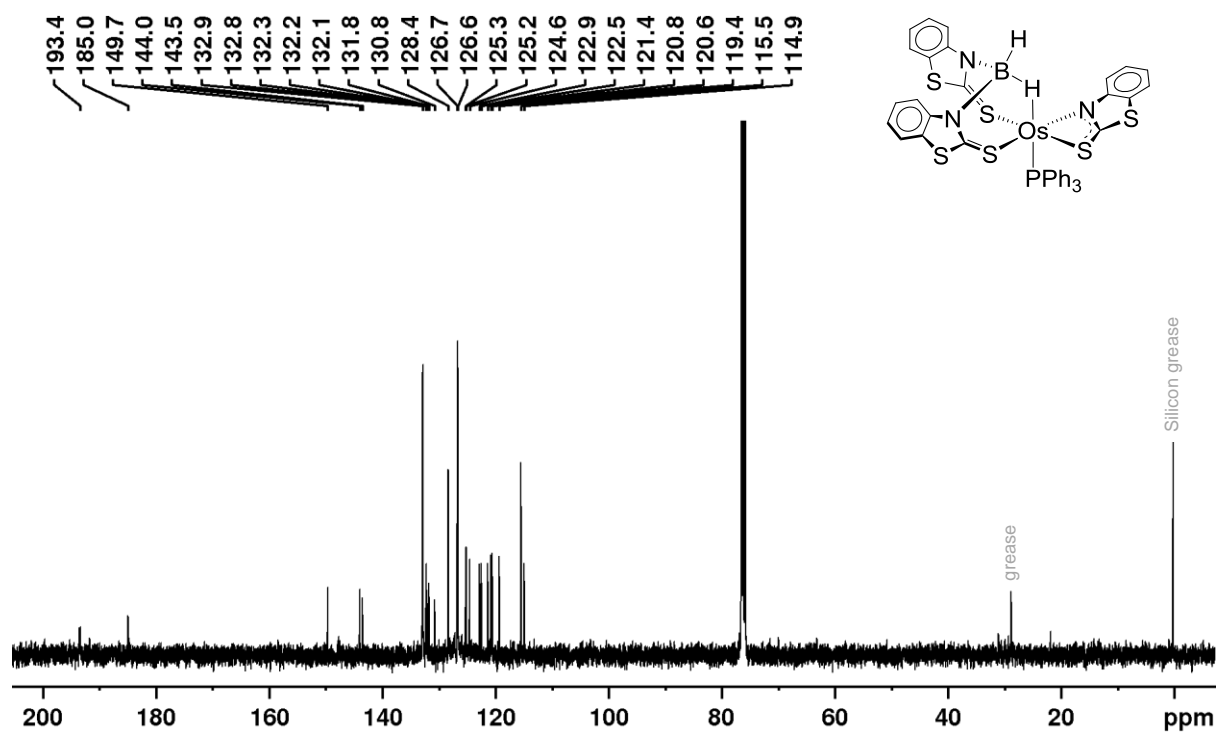

Figure S39.  $^{13}\text{C}\{^1\text{H}\}$  NMR spectrum of *trans*-6 in  $\text{CDCl}_3$ .

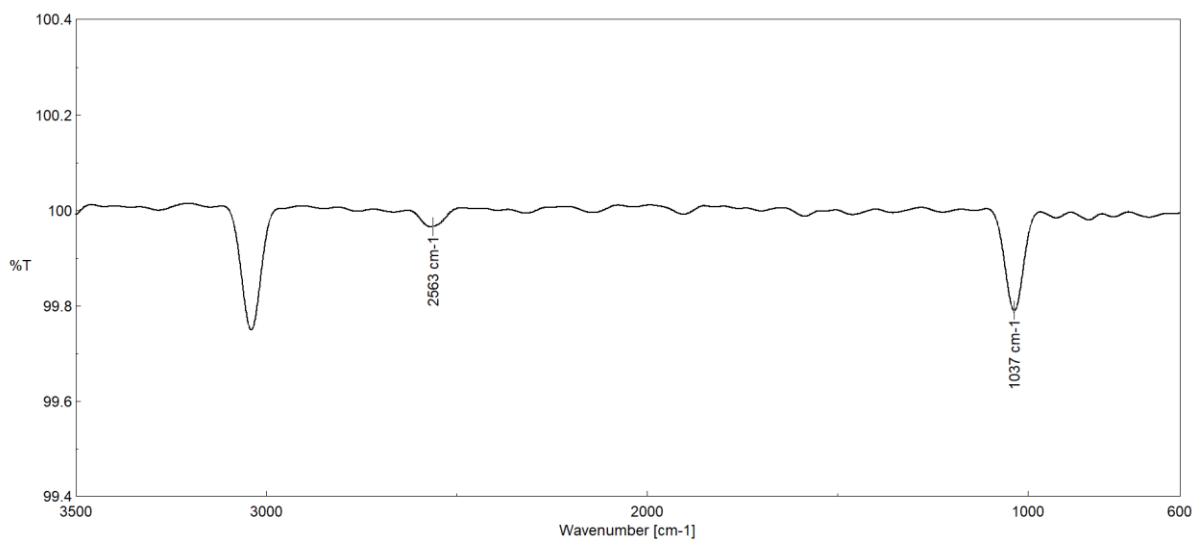

Figure S40. IR spectrum of *trans*-6 in CH<sub>2</sub>Cl<sub>2</sub>.

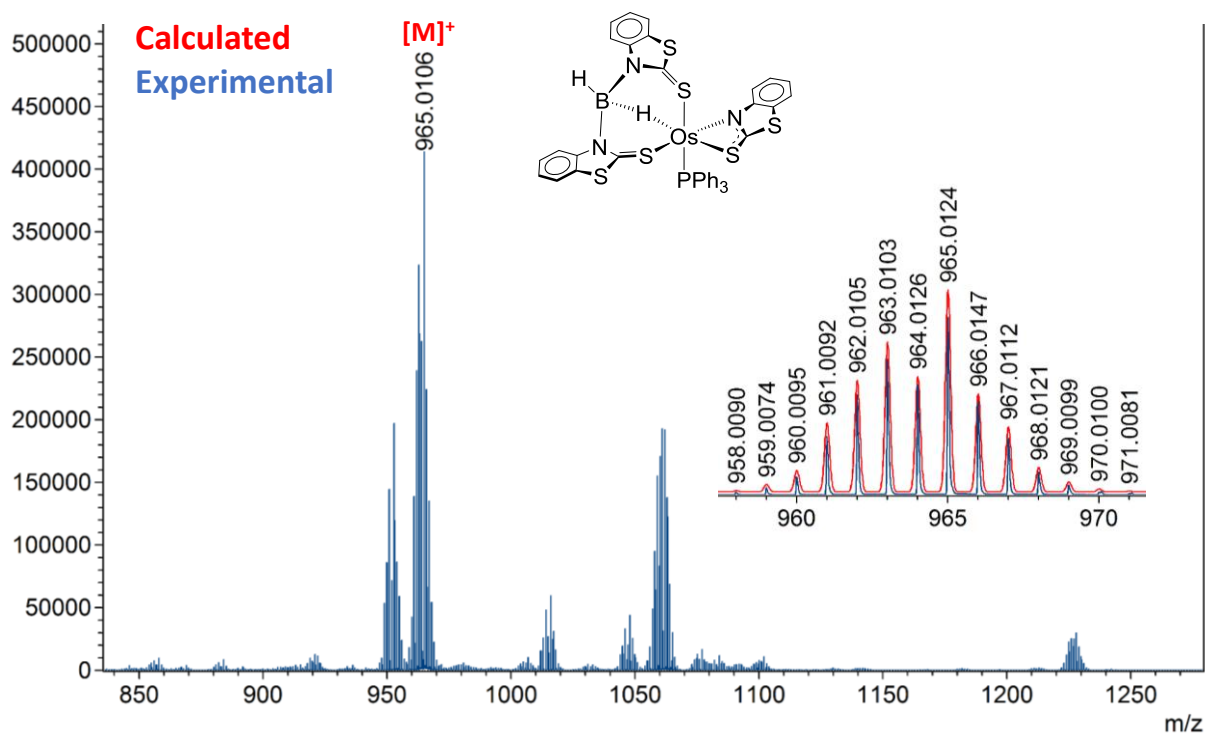

Figure S41. ESI-MS spectrum of *cis*-6.

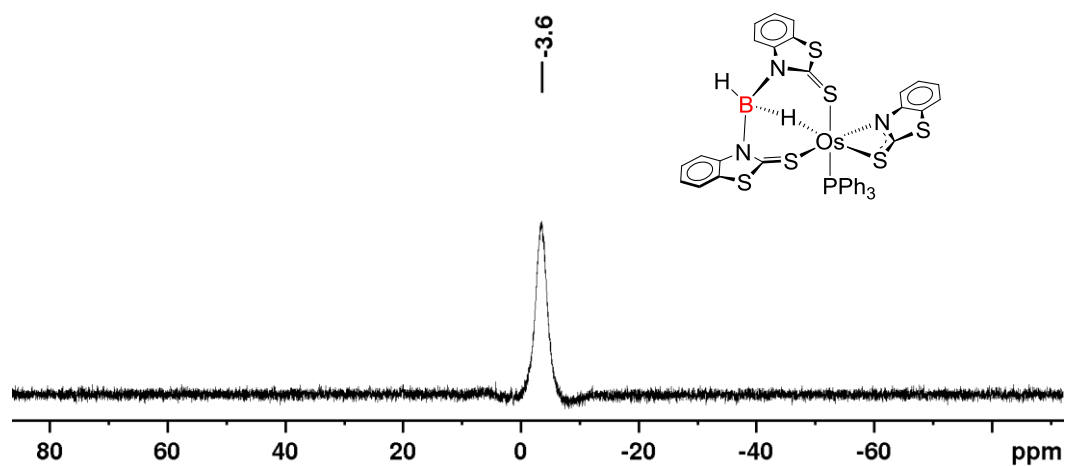

Figure S42.  $^{11}\text{B}\{^1\text{H}\}$  NMR spectrum of *cis*-6 in  $\text{CDCl}_3$ .

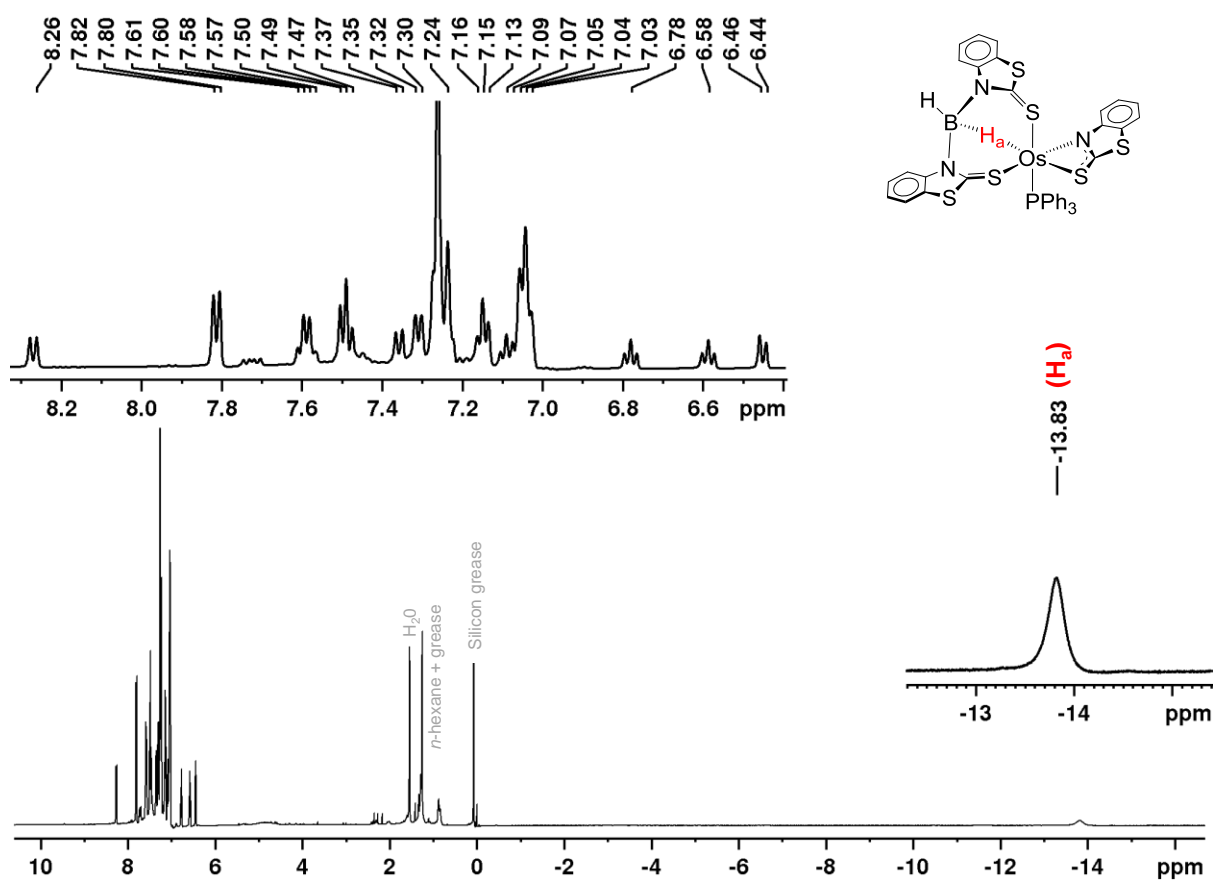

Figure S43.  $^1\text{H}$  NMR spectrum of *cis*-6 in  $\text{CDCl}_3$ .

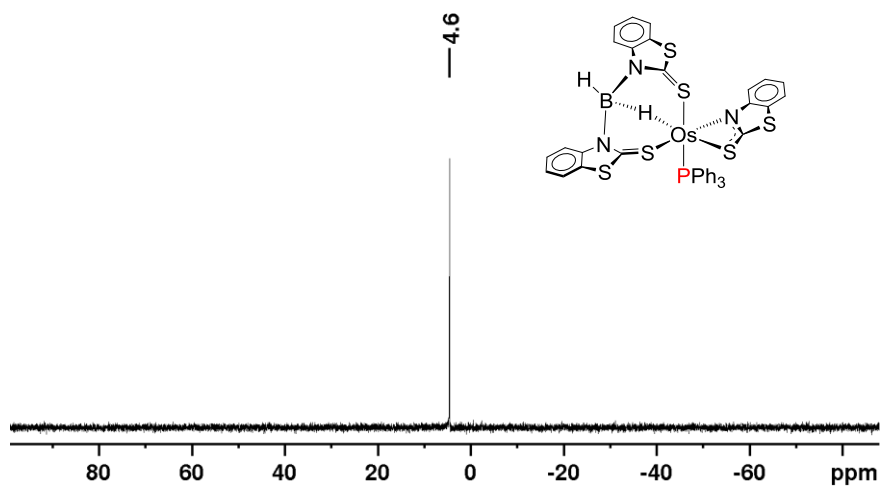

Figure S44.  $^{31}\text{P}\{^1\text{H}\}$  NMR spectrum of *cis-6* in  $\text{CDCl}_3$ .

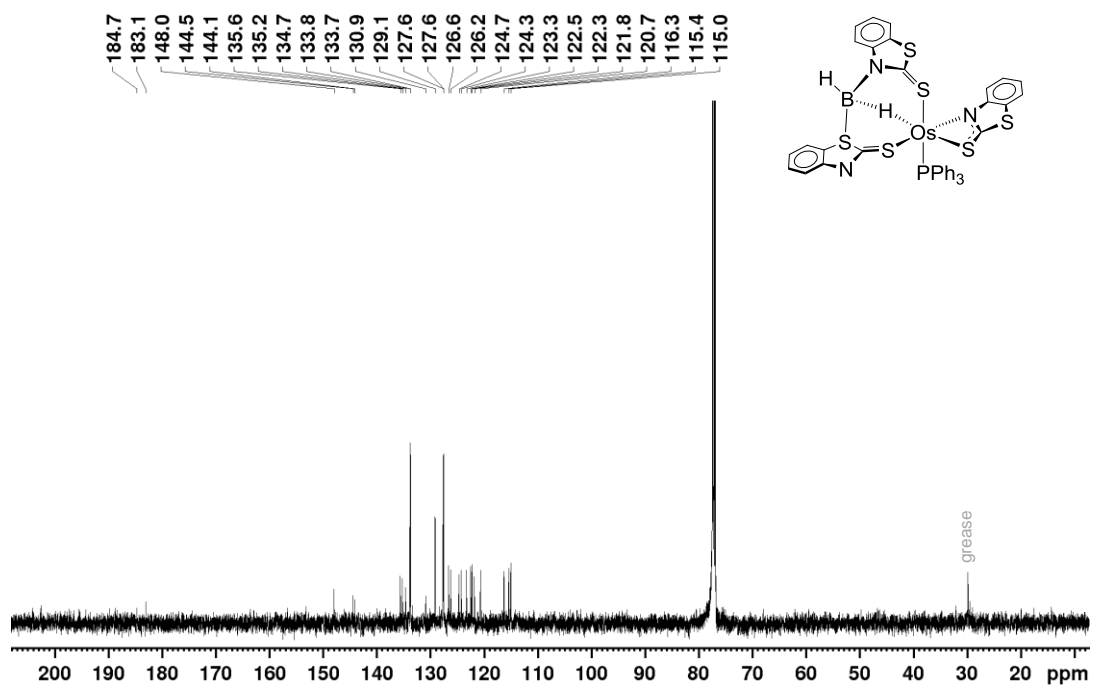

Figure S45.  $^{13}\text{C}\{^1\text{H}\}$  NMR spectrum of *cis-6* in  $\text{CDCl}_3$ .



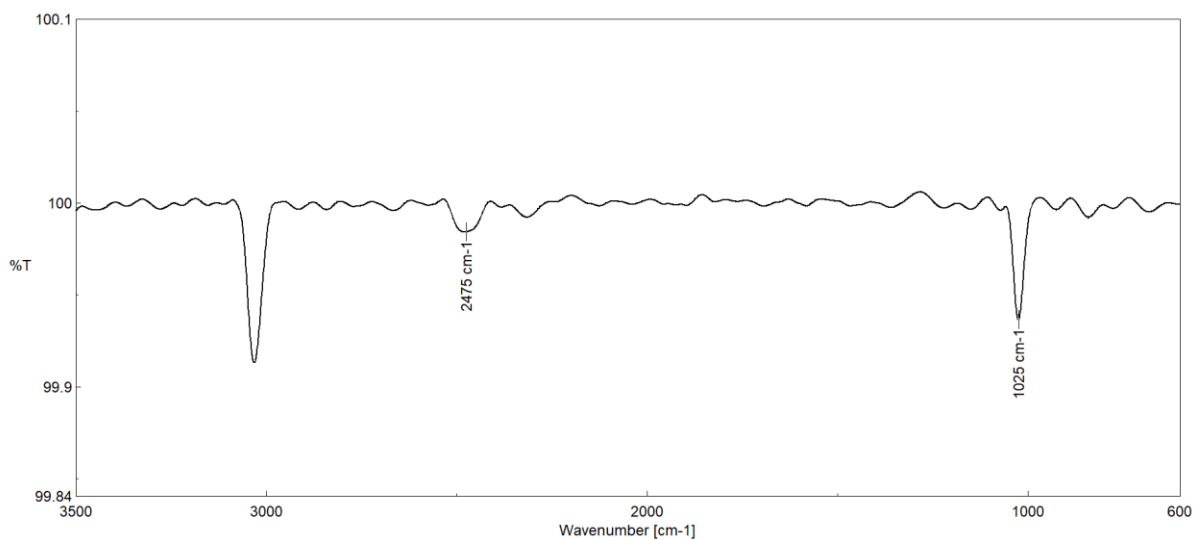

Figure S46. IR spectrum of *cis-6* in  $\text{CH}_2\text{Cl}_2$ .

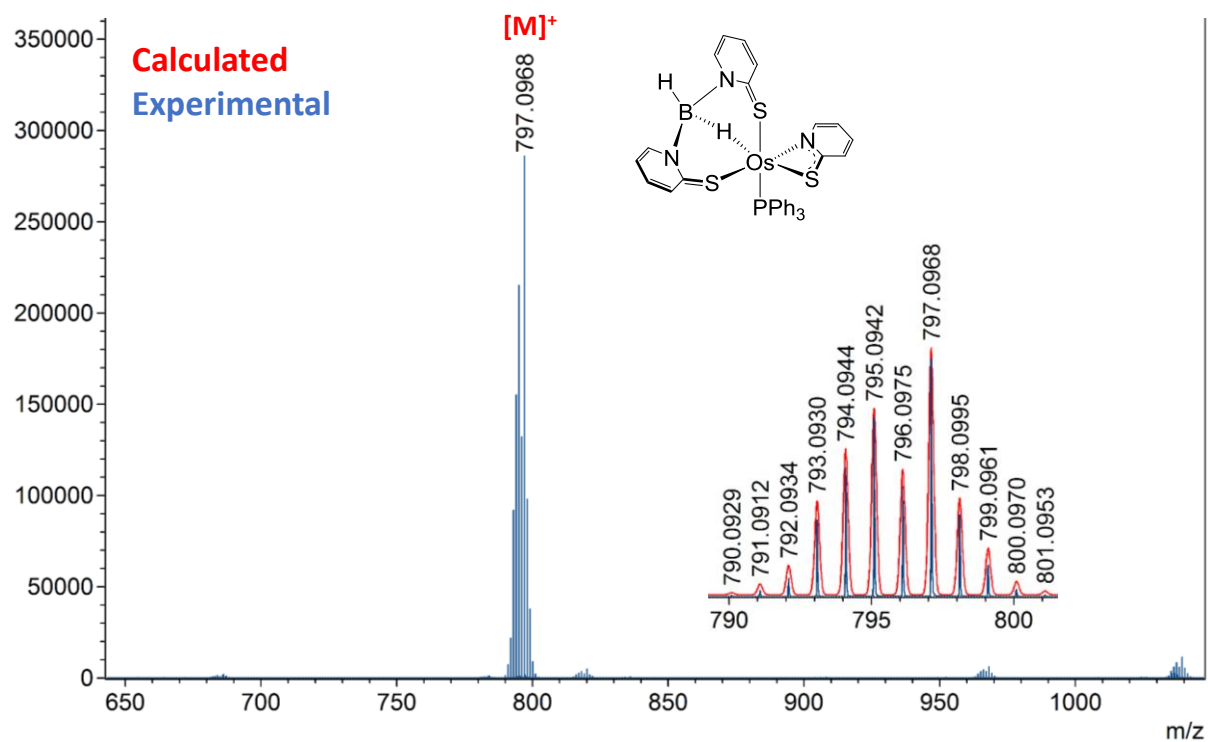

Figure S47. ESI-MS spectrum of *cis-7*.

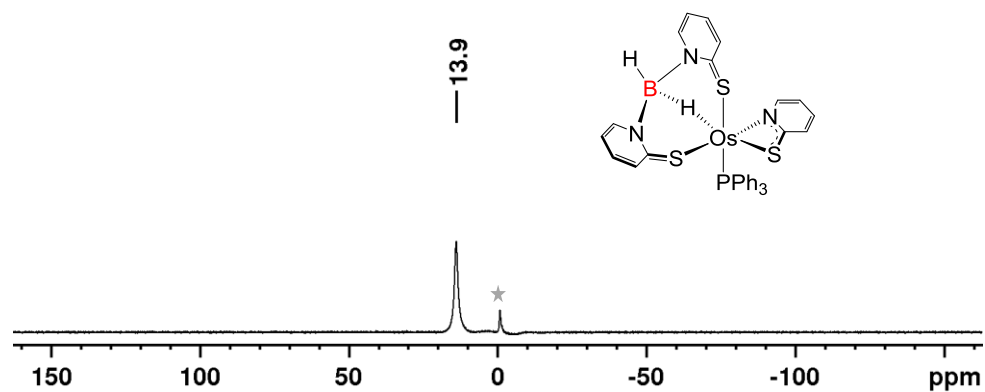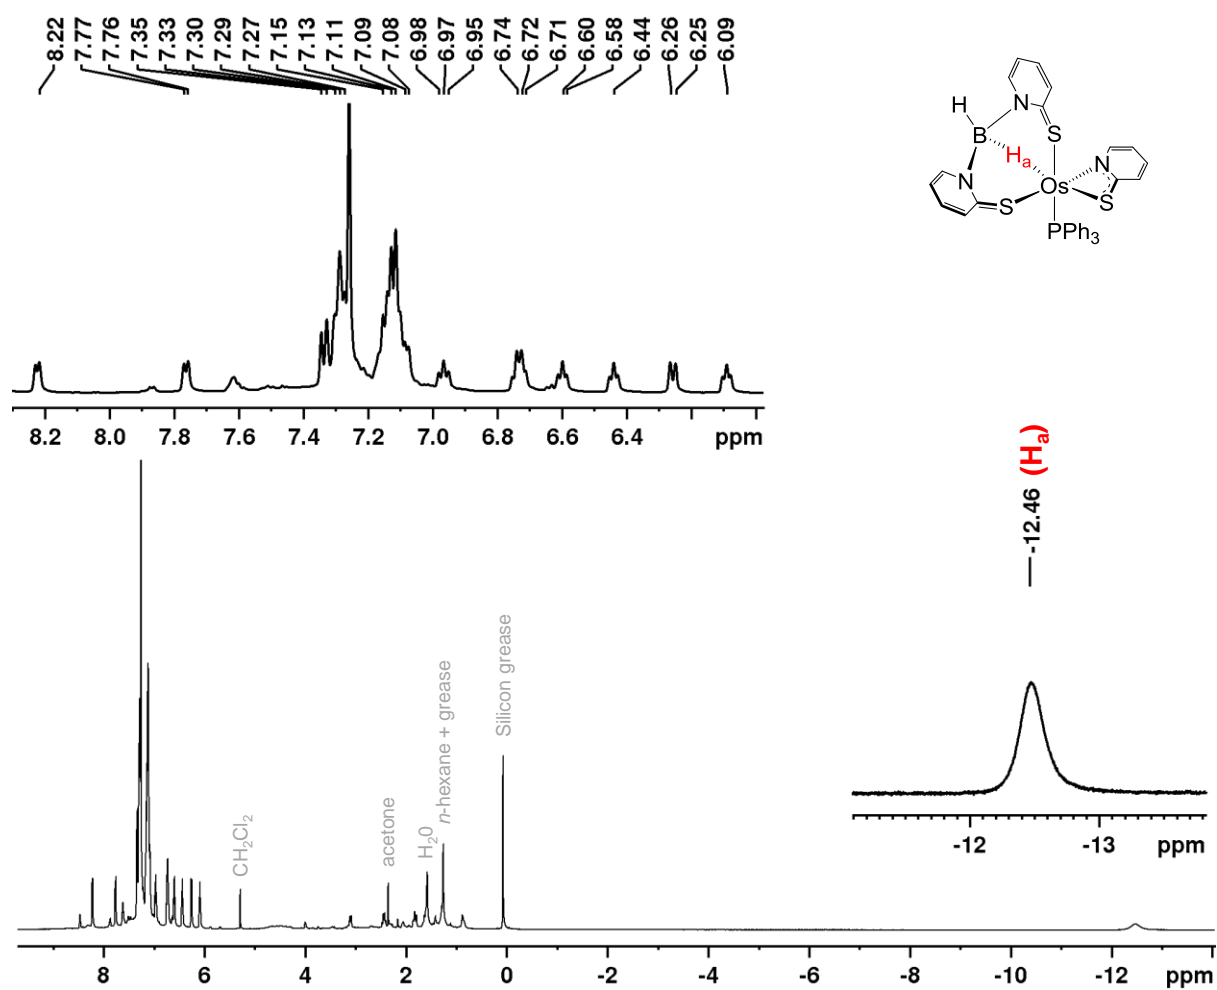

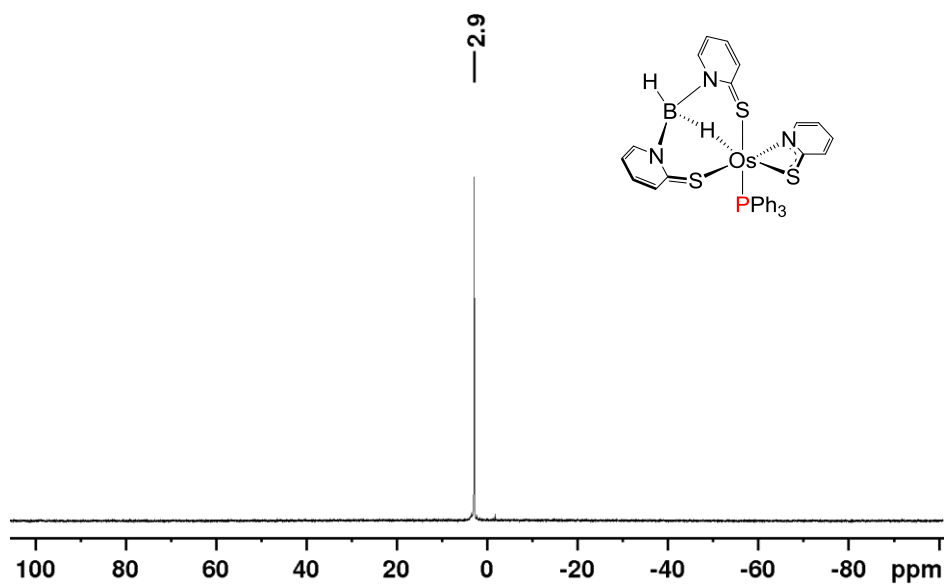

Figure S50.  $^{31}\text{P}\{^1\text{H}\}$  NMR spectrum of *cis-7* in  $\text{CDCl}_3$ .

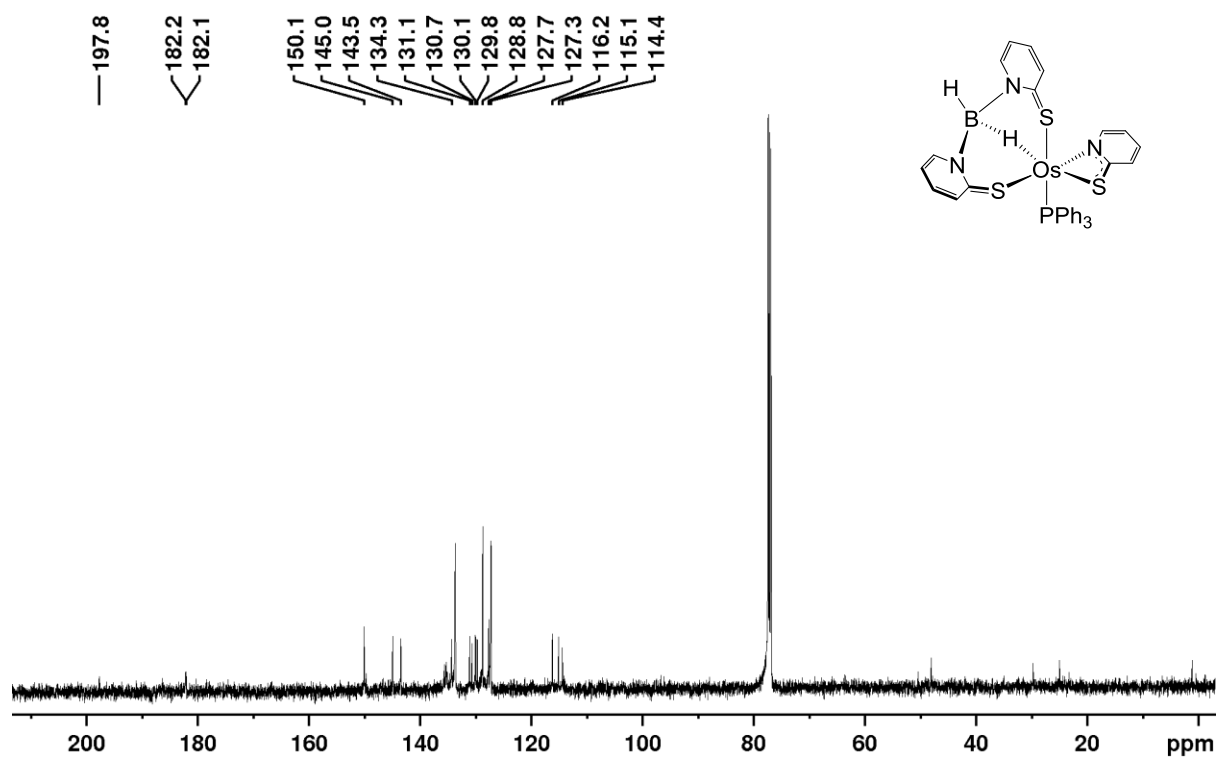

Figure S51.  $^{13}\text{C}\{^1\text{H}\}$  NMR spectrum of *cis-7* in  $\text{CDCl}_3$ .

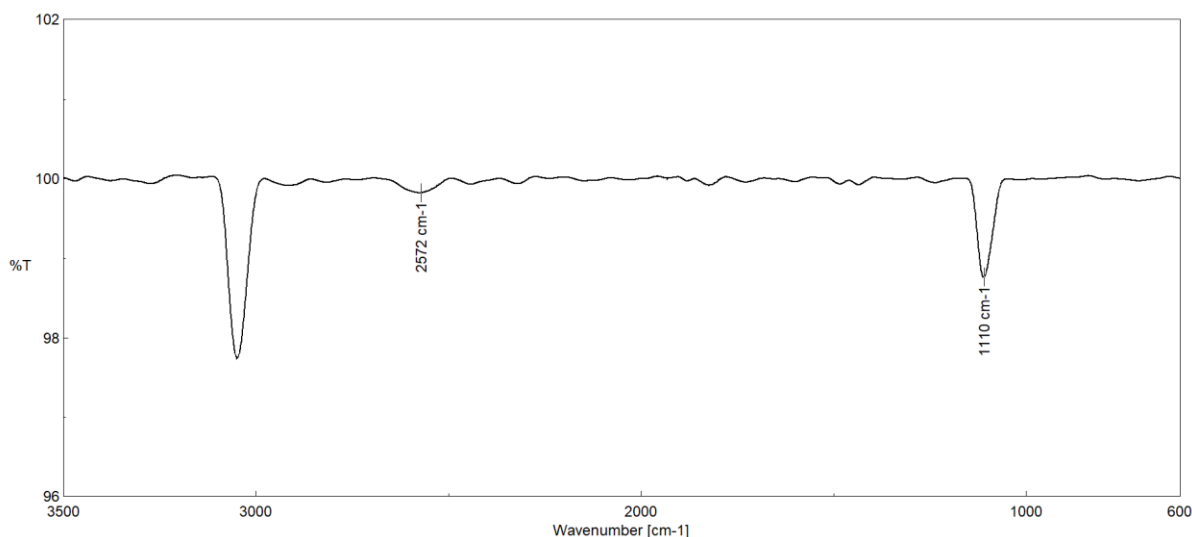

Figure S52. IR spectrum of *cis-7* in CH<sub>2</sub>Cl<sub>2</sub>.

### II.3 X-ray Analysis Details

Suitable X-ray quality crystals of **2b**, **4a**, **5**, *cis-6*, *trans-6* and *cis-7* were grown by slow diffusion of a hexane-CH<sub>2</sub>Cl<sub>2</sub> solution at -4 °C. Crystal data of **4a**, **5**, *trans-6* and *cis-7* were obtained and integrated using a D8 VENTURE Bruker AXS diffractometer with PHOTON II detector with graphite monochromated Mo-K $\alpha$  ( $\lambda = 0.71073$  Å) radiation at 298(2) K for **5**, *trans-6* and *cis-7* and at 296(2) K for **4a**. Crystal data of **2b**, *cis-6* was obtained and integrated using a Bruker APEX-II CCD diffractometer with graphite monochromated Mo-K $\alpha$  ( $\lambda = 0.71073$  Å) radiation at 296(2) K. All the structures were solved using SHELXT-2018 and SHELXS-97<sup>4</sup> and refined using SHELXL-2018, SHELXL-2014 and SHELXL-2019<sup>5</sup>. Using Olex2 all the molecular structures were drawn.<sup>6</sup> Crystallographic data have been deposited with the Cambridge Crystallographic Data Center as supplementary publication no CCDC-2353030 (**4a**), 2353031 (**4a**), 2353032 (**5**), 2353033 (*trans-6*), 2353034 (*cis-6*) and 2353035 (*cis-7*). These data can be obtained free of charge from The Cambridge Crystallographic Data Centre via [www.ccdc.cam.ac.uk/data\\_request/cif](http://www.ccdc.cam.ac.uk/data_request/cif).

*Crystal data for 2b*: C<sub>47</sub>H<sub>40</sub>Cl<sub>2</sub>N<sub>2</sub>OsP<sub>2</sub>S<sub>2</sub>,  $M_r = 1019.97$ , triclinic, space group *P*-1,  $a = 11.6034(3)$  Å,  $b = 12.2578(3)$  Å,  $c = 17.0531(4)$  Å,  $\alpha = 74.1121(10)^\circ$ ,  $\beta = 85.1640(11)^\circ$ ,  $\gamma = 64.8014(10)^\circ$ ,  $V = 2109.39(9)$  Å<sup>3</sup>,  $Z = 2$ ,  $\rho_{\text{calcd}} = 1.606$  g/cm<sup>3</sup>,  $\mu = 3.361$  mm<sup>-1</sup>,  $F(000) = 1016.0$ ,  $R_1 = 0.0291$ ,  $wR_2 = 0.0683$ , 7396 independent reflections [ $2\theta \leq 50.000^\circ$ ] and 505 parameters.

*Crystal data for 4a*: C<sub>50</sub>H<sub>40</sub>N<sub>2</sub>OsP<sub>2</sub>S<sub>4</sub>B,  $M_r = 1060.03$ , triclinic, space group *P*-1,  $a = 9.6569(8)$  Å,  $b = 11.9102(8)$  Å,  $c = 20.8069(16)$  Å,  $\alpha = 86.218(4)^\circ$ ,  $\beta = 84.416(4)^\circ$ ,  $\gamma = 69.354(4)^\circ$ ,  $V = 2227.5(3)$  Å<sup>3</sup>,  $Z = 2$ ,  $\rho_{\text{calcd}} = 1.580$  g/cm<sup>3</sup>,  $\mu = 3.160$  mm<sup>-1</sup>,  $F(000) = 1058.0$ ,  $R_1 = 0.0390$ ,  $wR_2 = 0.0771$ , 11172 independent reflections [ $2\theta \leq 56.866^\circ$ ] and 549 parameters.

*Crystal data for 5*: C<sub>28</sub>H<sub>25</sub>POsS<sub>2</sub>BON<sub>2</sub>,  $M_r = 701.60$ , triclinic, space group *P*-1,  $a = 9.7769(3)$  Å,  $b = 11.7895(4)$  Å,  $c = 13.7966(6)$  Å,  $\alpha = 69.327(2)^\circ$ ,  $\beta = 85.219(2)^\circ$ ,  $\gamma = 68.070(1)^\circ$ ,  $V = 1378.05(9)$  Å<sup>3</sup>,  $Z = 2$ ,

$\rho_{\text{calcd}} = 1.691 \text{ g/cm}^3$ ,  $\mu = 4.860 \text{ mm}^{-1}$ ,  $F(000) = 686.0$ ,  $R_1 = 0.0177$ ,  $wR_2 = 0.0441$ , 5124 independent reflections [ $2\theta \leq 50.992^\circ$ ] and 336 parameters.

*Crystal data for trans-6:*  $\text{C}_{40}\text{H}_{31}\text{BPS}_6\text{OsCl}_2\text{N}_3$ ,  $M_r = 1048.92$ , monoclinic, space group  $C2/c$ ,  $a = 36.1185(15) \text{ \AA}$ ,  $b = 36.1185(15) \text{ \AA}$ ,  $c = 28.0264(12) \text{ \AA}$ ,  $\alpha = 90^\circ$ ,  $\beta = 127.780(1)^\circ$ ,  $\gamma = 90^\circ$ ,  $V = 8143.9(6) \text{ \AA}^3$ ,  $Z = 8$ ,  $\rho_{\text{calcd}} = 1.711 \text{ g/cm}^3$ ,  $\mu = 3.645 \text{ mm}^{-1}$ ,  $F(000) = 4144.0$ ,  $R_1 = 0.0456$ ,  $wR_2 = 0.1081$ , 8348 independent reflections [ $2\theta \leq 52.866^\circ$ ] and 493 parameters.

*Crystal data for cis-6:*  $\text{C}_{39}\text{H}_{29}\text{N}_3\text{PS}_6\text{OsB}$ ,  $M_r = 963.99$ , monoclinic, space group  $P2_1/c$ ,  $a = 10.9773(4) \text{ \AA}$ ,  $b = 23.2835(8) \text{ \AA}$ ,  $c = 14.8343(5) \text{ \AA}$ ,  $\alpha = 90^\circ$ ,  $\beta = 103.8767(15)^\circ$ ,  $\gamma = 90^\circ$ ,  $V = 3680.8(2) \text{ \AA}^3$ ,  $Z = 4$ ,  $\rho_{\text{calcd}} = 1.740 \text{ g/cm}^3$ ,  $\mu = 3.883 \text{ mm}^{-1}$ ,  $F(000) = 1904.0$ ,  $R_1 = 0.0402$ ,  $wR_2 = 0.0868$ , 6473 independent reflections [ $2\theta \leq 49.996^\circ$ ] and 468 parameters.

*Crystal data for cis-7:*  $\text{C}_{33}\text{H}_{29}\text{N}_3\text{S}_3\text{PBOs}$ ,  $M_r = 795.75$ , monoclinic, space group  $P2_1/n$ ,  $a = 9.516(3) \text{ \AA}$ ,  $b = 19.737(7) \text{ \AA}$ ,  $c = 19.416(6) \text{ \AA}$ ,  $\alpha = 90^\circ$ ,  $\beta = 93.665(9)^\circ$ ,  $\gamma = 90^\circ$ ,  $V = 3639(2) \text{ \AA}^3$ ,  $Z = 4$ ,  $\rho_{\text{calcd}} = 1.452 \text{ g/cm}^3$ ,  $\mu = 3.745 \text{ mm}^{-1}$ ,  $F(000) = 1568.0$ ,  $R_1 = 0.0378$ ,  $wR_2 = 0.0787$ , 6387 independent reflections [ $2\theta \leq 49.994^\circ$ ] and 385 parameters.

### III Computational Details

All molecules were fully optimized with the Gaussian 16 program<sup>7</sup> using the gradient-corrected Becke–Lee–Yang–Parr (B3LYP) functional<sup>8</sup> in conjunction with the 6-31g(d)-LANL2DZ basis set from the EMSL Basis Set Exchange Library<sup>9</sup>. The model compounds were fully optimized starting from X-ray coordinates in the gaseous state (no solvent effect). Frequency calculations were carried out for the verification of the nature of the stationary state and to confirm the absence of any imaginary frequency which eventually confirmed the minima on the potential energy hypersurface for all structures. Furthermore, the gauge including atomic orbital (GIAO)<sup>10</sup> method was employed to compute the  $^{11}\text{B}$  chemical shifts. Wiberg bond indices (WBI)<sup>11</sup> was generated from natural bond orbital analysis (NBO)<sup>12</sup>. All the optimized geometries and orbital pictures were drawn by Chemcraft<sup>13</sup> visualization programs. Laplacian electronic distribution plots and Two-dimensional electron density and were generated using the Multiwfn package.<sup>14</sup>

**Table S2.** Selected geometrical parameters and Wiberg Bond Indices (WBI) of **2a-b**, **3a-b**, **4a-b**, **5'**, *trans*-**6** and *cis*-**6**.

| <b>2a</b>               |            |       |       | <b>2b</b>             |            |       |       |
|-------------------------|------------|-------|-------|-----------------------|------------|-------|-------|
|                         | Expt.      | Cal.  | WBI   |                       | Expt.      | Cal.  | WBI   |
| Os1-S1                  | -          | 2.529 | 0.675 | Os1-S1                | 2.4317(10) | 2.518 | 0.719 |
| Os1-S2                  | -          | 2.521 | 0.682 | Os1-S2                | 2.4285(10) | 2.506 | 0.729 |
| Os1-N1                  | -          | 2.210 | 0.453 | Os1-N1                | 2.142(3)   | 2.157 | 0.504 |
| Os1-N2                  | -          | 2.198 | 0.454 | Os1-N2                | 2.135(3)   | 2.147 | 0.503 |
| <b>3a</b>               |            |       |       | <b>3b</b>             |            |       |       |
|                         | Expt.      | Cal.  | WBI   |                       | Expt.      | Cal.  | WBI   |
| Os1-S1                  | -          | 2.336 | 0.961 | Os1-S1                | -          | 2.357 | 0.956 |
| Os1-S3                  | -          | 2.583 | 0.646 | Os1-S2                | -          | 2.548 | 0.694 |
| Os1-S5                  | -          | 2.425 | 0.829 | Os1-S3                | -          | 2.410 | 0.861 |
| Os1-N1                  | -          | 2.168 | 0.506 | Os1-N1                | -          | 2.140 | 0.532 |
| Os1-N2                  | -          | 2.165 | 0.488 | Os1-N2                | -          | 2.130 | 0.516 |
| <b>4a</b>               |            |       |       | <b>4b</b>             |            |       |       |
|                         | Expt.      | Cal.  | WBI   |                       | Expt.      | Cal.  | WBI   |
| Os1-B1                  | 2.689      | 2.799 | 0.188 | Os1-B1                | -          | 2.691 | 0.227 |
| Os1-H2A                 | -          | 1.616 | 0.758 | Os1-H2A               | -          | 1.623 | 0.749 |
| Os1-H1B                 | 1.69(4)    | 1.843 | 0.237 | Os1-H1B               | -          | 1.799 | 0.261 |
| B1-H1B                  | 1.31(4)    | 1.254 | 0.685 | B1-H1B                | -          | 1.262 | 0.655 |
| Os1-S2                  | 2.3985(11) | 2.444 | 0.703 | Os1-S1                | -          | 2.419 | 0.747 |
| <b>5'</b>               |            |       |       |                       |            |       |       |
|                         | Expt.      | Cal.  | WBI   |                       | Expt.      | Cal.  | WBI   |
| Os1-B1                  | -          | 2.067 | 0.686 |                       |            |       |       |
| Os1-H2B                 | -          | 1.701 | 0.474 |                       |            |       |       |
| B1-H2B                  | -          | 1.494 | 0.408 |                       |            |       |       |
| Os1-S1                  | -          | 2.434 | 0.745 |                       |            |       |       |
| Os1-S2                  | -          | 2.558 | 0.694 |                       |            |       |       |
| <i>trans</i> - <b>6</b> |            |       |       | <i>cis</i> - <b>6</b> |            |       |       |
|                         | Expt.      | Cal.  | WBI   |                       | Expt.      | Cal.  | WBI   |
| Os1-B1                  | 2.712      | 2.772 | 0.194 | Os1-B1                | 2.497(8)   | 2.602 | 0.286 |
| Os1-H1A                 | 1.76(5)    | 1.799 | 0.277 | Os1-H1A               | 1.71(6)    | 1.715 | 0.350 |
| B1-H1A                  | 1.21(2)    | 1.251 | 0.645 | B1-H1A                | 1.31(6)    | 1.305 | 0.554 |
| Os1-S5                  | 2.4816(15) | 2.549 | 0.649 | Os1-S4                | 2.4741(18) | 2.537 | 0.696 |
| Os1-N3                  | 2.127(4)   | 2.168 | 0.508 | Os1-N3                | 2.138(5)   | 2.145 | 0.520 |

**Table S3.** Experiment and calculated  $^{11}\text{B}$  NMR, calculated natural charge and HOMO-LUMO energy gap of **2a-b**, **3a-b**, **4a-b**, **5'**, *trans*-**6** and *cis*-**6**.

| Complexes                                                                                        | $^{11}\text{B}$ NMR (ppm) |      | Natural Charge (q) |                |                                           |                                        | $\Delta E_{\text{H-L}}$<br>(eV) |
|--------------------------------------------------------------------------------------------------|---------------------------|------|--------------------|----------------|-------------------------------------------|----------------------------------------|---------------------------------|
|                                                                                                  | Expt                      | Calc | $q_{\text{Os}}$    | $q_{\text{B}}$ | $q_{\text{N}}$                            | $q_{\text{S}}$                         |                                 |
| 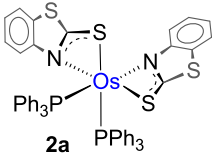<br><b>2a</b>   | -                         | -    | -0.800             | -              | -0.505                                    | 0.057 (S1)<br>0.070 (S2)               | 3.810                           |
| <br><b>2b</b>   | -                         | -    | -0.845             | -              | -0.453                                    | 0.002 (S1)<br>0.016 (S2)               | 3.520                           |
| <br><b>3a</b>  | -                         | -    | -0.556             | -              | -0.497 (N1)<br>-0.497 (N2)<br>-0.502 (N3) | 0.218 (S1)<br>0.094 (S3)<br>0.183 (S5) | 2.072                           |
| <br><b>3b</b> | -                         | -    | -0.582             | -              | -0.449 (N1)<br>-0.430 (N2)<br>-0.490 (N3) | 0.145 (S1)<br>0.056 (S2)<br>0.133 (S3) | 2.126                           |
| <br><b>4a</b> | -3.3                      | -8.4 | -1.483             | -0.412         | -0.607 (N1)<br>-0.622 (N2)                | 0.272 (S2)<br>0.235 (S4)               | 3.467                           |
| <br><b>4b</b> | 10.3                      | 13.2 | -1.554             | -0.418         | -0.568 (N1)<br>-0.575 (N2)                | 0.235 (S1)<br>0.202 (S2)               | 2.922                           |
| <br><b>5'</b> | 62.5 (5)                  | 46.2 | -1.072             | 0.2873         | -0.585 (N1)<br>-0.433 (N2)                | 0.219 (S1)<br>0.029 (S2)               | 2.929                           |

|                                                                                                         |      |      |        |       |             |            |       |
|---------------------------------------------------------------------------------------------------------|------|------|--------|-------|-------------|------------|-------|
|  <p><i>trans-6</i></p> | -3.6 | -6.7 | -0.900 | 0.438 | -0.613 (N1) | 0.240 (S1) | 2.987 |
|                                                                                                         |      |      |        |       | -0.600 (N2) | 0.252 (S3) |       |
|                                                                                                         |      |      |        |       | -0.484 (N3) | 0.098 (S5) |       |
|  <p><i>cis-6</i></p>   | -3.7 | -5.7 | -0.970 | 0.455 | -0.474 (N1) | 0.110 (S4) | 3.175 |
|                                                                                                         |      |      |        |       | -0.623 (N2) | 0.251 (S5) |       |
|                                                                                                         |      |      |        |       | -0.611 (N3) | 0.256 (S6) |       |

**Table S4.** Topological parameters at selected bond critical points (BCPs) of **2a-b**, **3a-b**, **4a-b**, **5'**, *trans-6* and *cis-6*.

| Complexes                                                                                            | BCP     | $\rho(r)$ | $H(r)$ | $\nabla^2\rho(r)$ | $ELF$ | $\epsilon$ |
|------------------------------------------------------------------------------------------------------|---------|-----------|--------|-------------------|-------|------------|
| 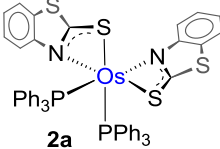 <p><b>2a</b></p>  | Os1-S1  | 0.067     | -0.018 | 0.122             | 0.301 | 0.555      |
|                                                                                                      | Os1-S2  | 0.034     | -0.019 | 0.124             | 0.305 | 0.447      |
|                                                                                                      | Os1-N1  | 0.077     | -0.015 | 0.292             | 0.172 | 0.288      |
|                                                                                                      | Os1-N2  | 0.079     | -0.017 | 0.300             | 0.177 | 0.284      |
|  <p><b>2b</b></p> | Os1-S1  | 0.070     | -0.019 | 0.119             | 0.327 | 0.519      |
|                                                                                                      | Os1-S2  | 0.071     | -0.020 | 0.120             | 0.330 | 0.401      |
|                                                                                                      | Os1-N1  | 0.088     | -0.020 | 0.340             | 0.340 | 0.250      |
|                                                                                                      | Os1-N2  | 0.090     | -0.021 | 0.348             | 0.296 | 0.262      |
|  <p><b>3a</b></p> | Os1-S1  | 0.096     | -0.030 | 0.205             | 0.347 | 0.212      |
|                                                                                                      | Os1-S2  | 0.061     | -0.012 | 0.114             | 0.313 | 0.528      |
|                                                                                                      | Os1-S3  | 0.084     | -0.024 | 0.147             | 0.377 | 0.226      |
|                                                                                                      | Os1-N1  | 0.088     | -0.018 | 0.329             | 0.210 | 0.469      |
|  <p><b>3b</b></p> | Os1-S1  | 0.090     | -0.028 | 0.193             | 0.332 | 0.262      |
|                                                                                                      | Os1-S2  | 0.067     | -0.018 | 0.107             | 0.336 | 0.565      |
|                                                                                                      | Os1-S3  | 0.085     | -0.027 | 0.144             | 0.374 | 0.236      |
|                                                                                                      | Os1-N1  | 0.093     | -0.022 | 0.344             | 0.211 | 0.554      |
|  <p><b>4a</b></p> | Os1-H2A | 0.144     | -0.081 | 0.132             | 0.513 | 0.250      |
|                                                                                                      | Os1-H1B | 0.068     | -0.017 | 0.256             | 0.142 | 0.187      |
|                                                                                                      | Os1-S2  | 0.073     | -0.019 | 0.236             | 0.357 | 0.122      |
|                                                                                                      | B1-H1B  | 0.141     | -0.131 | -0.106            | 0.526 | 0.251      |



|                       |          |       |        |        |       |       |
|-----------------------|----------|-------|--------|--------|-------|-------|
| <p><b>4b</b></p>      | Os1-H2A  | 0.145 | -0.079 | 0.119  | 0.545 | 0.246 |
|                       | Os1- H1B | 0.078 | -0.026 | 0.273  | 0.377 | 0.198 |
|                       | Os1-S2   | 0.079 | -0.019 | 0.205  | 0.271 | 0.094 |
|                       | B1-H1B   | 0.140 | -0.138 | -0.105 | 0.483 | 0.253 |
| <p><b>5'</b></p>      | Os1-H2A  | 0.109 | -0.044 | 0.322  | 0.259 | 1.546 |
|                       | Os1- B1  | 0.121 | -0.071 | -0.225 | 0.641 | 0.600 |
|                       | B1-H2A   | 0.120 | -0.076 | -0.153 | 0.831 | 0.530 |
|                       | B1-H2B   | 0.112 | -0.062 | -0.102 | 0.811 | 0.783 |
| <p><i>trans-6</i></p> | Os1-H1A  | 0.077 | -0.022 | 0.254  | 0.182 | 0.059 |
|                       | Os1- S5  | 0.064 | -0.017 | 0.118  | 0.291 | 0.472 |
|                       | Os1-N3   | 0.084 | -0.018 | 0.326  | 0.183 | 0.382 |
|                       | B1-H1A   | 0.138 | -0.126 | -0.055 | 0.473 | 0.266 |
| <p><i>cis-6</i></p>   | Os1-H2B  | 0.097 | -0.037 | 0.281  | 0.238 | 0.112 |
|                       | Os1- S4  | 0.065 | -0.017 | 0.121  | 0.295 | 0.478 |
|                       | Os1-N1   | 0.088 | -0.019 | 0.354  | 0.182 | 0.379 |
|                       | B1-H2B   | 0.126 | -0.109 | -0.085 | 0.514 | 0.445 |

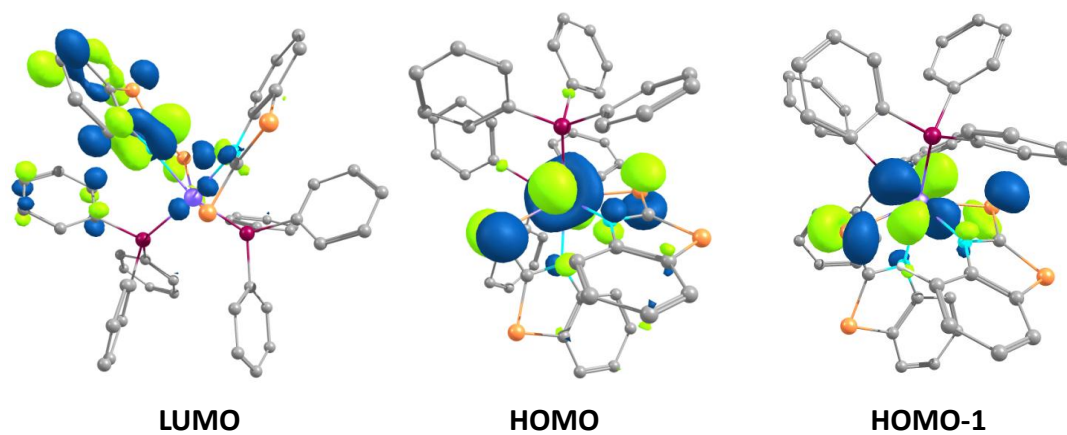

**Figure S53.** Selected molecular orbitals of **2a** (isocontour values:  $\pm 0.043$  [e.bohr<sup>-3</sup>]<sup>1/2</sup>).

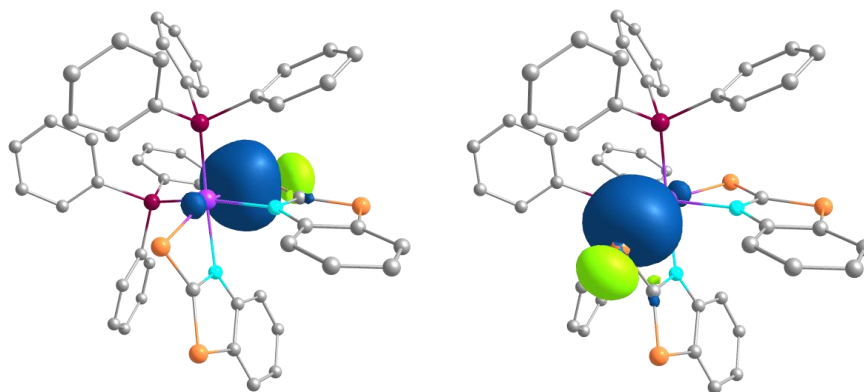

Figure S54. Selected NBOs of **2a** (isocontour values:  $\pm 0.043$  [e.bohr<sup>-3</sup>]<sup>1/2</sup>).

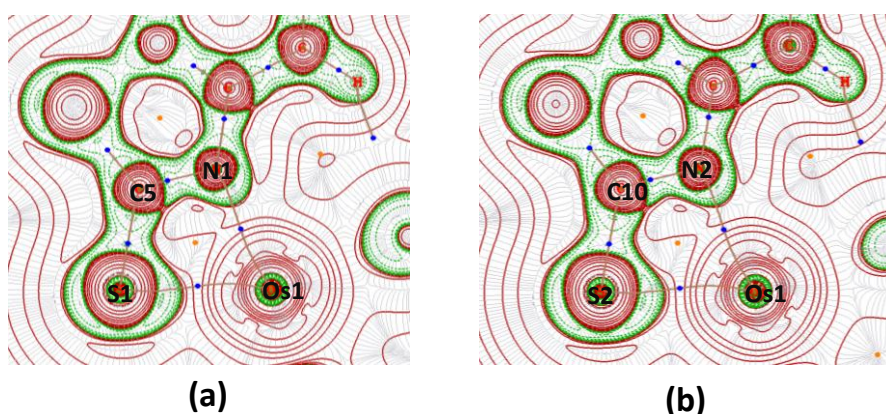

Figure S55. Contour-line diagram of the Laplacian of electron density in the Os1-N1-C5-S1 (a) and Os1-N2-C10-S2 (b) planes of **2a**, respectively. The solid brown lines are bond paths, while blue spheres indicate the bond critical points and orange sphere indicates ring critical points. Area of charge concentration [ $\nabla^2\rho(r) < 0$ ] are indicated by solid lines and area of charge depletion [ $\nabla^2\rho(r) > 0$ ] are shown by dashed lines.

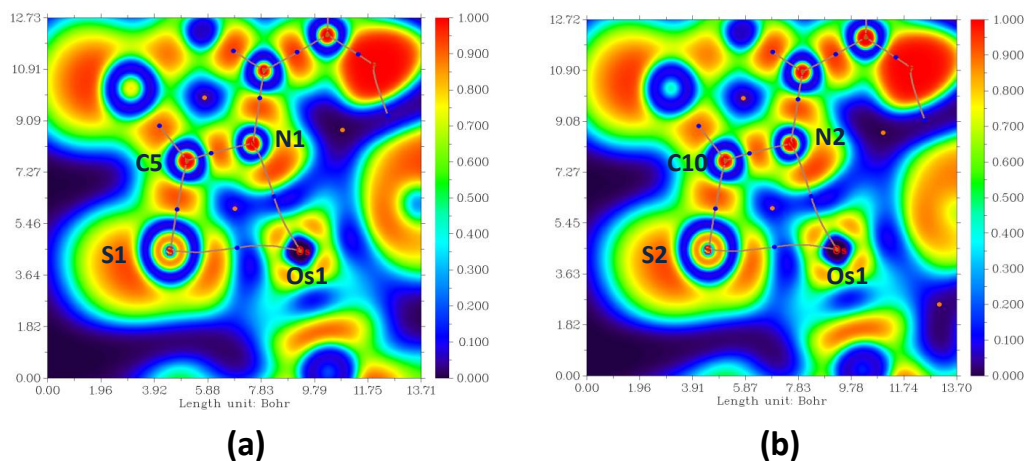

Figure S56. ELF plot in the Os1-N1-C5-S1 (a) and Os1-N2-C10-S2 (b) planes of **2a**, respectively.

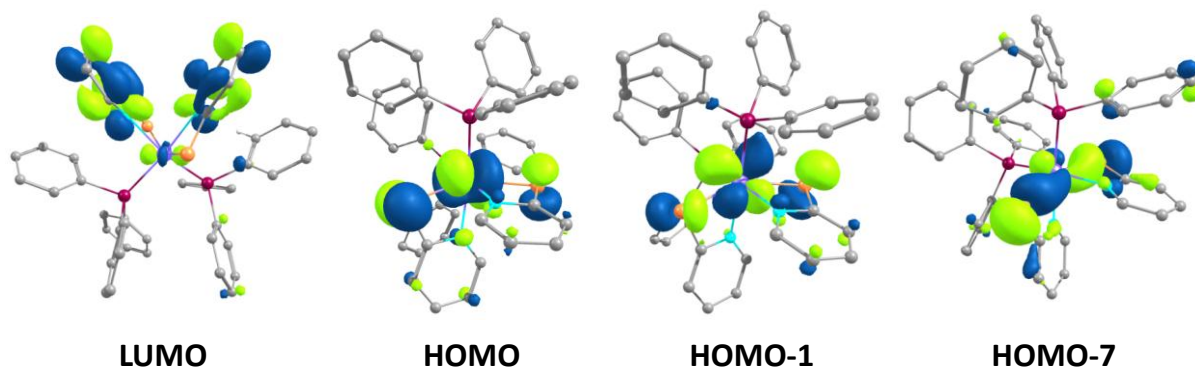

**Figure S57.** Selected molecular orbitals of **2b** (isocontour values:  $\pm 0.043$  [e.bohr<sup>-3</sup>]<sup>1/2</sup>).

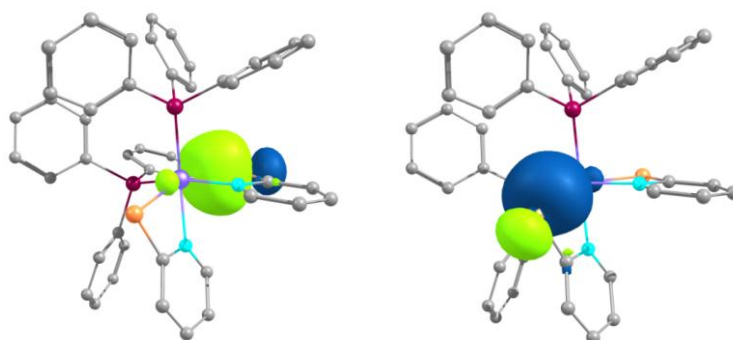

**Figure S58.** Selected NBOs of **2b** (isocontour values:  $\pm 0.043$  [e.bohr<sup>-3</sup>]<sup>1/2</sup>).

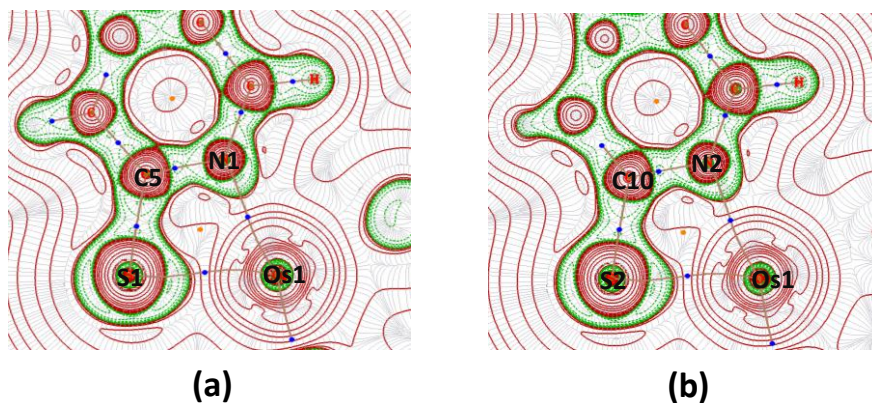

**Figure S59.** Contour-line diagram of the Laplacian of electron density in the Os1-N1-C5-S1 (a) and Os1-N2-C10-S2 (b) planes of **2b**, respectively. The solid brown lines are bond paths, while blue spheres indicate the bond critical points and orange sphere indicates ring critical points. Area of charge concentration [ $\nabla^2\rho(r)<0$ ] are indicated by solid lines and area of charge depletion [ $\nabla^2\rho(r)>0$ ] are shown by dashed lines.

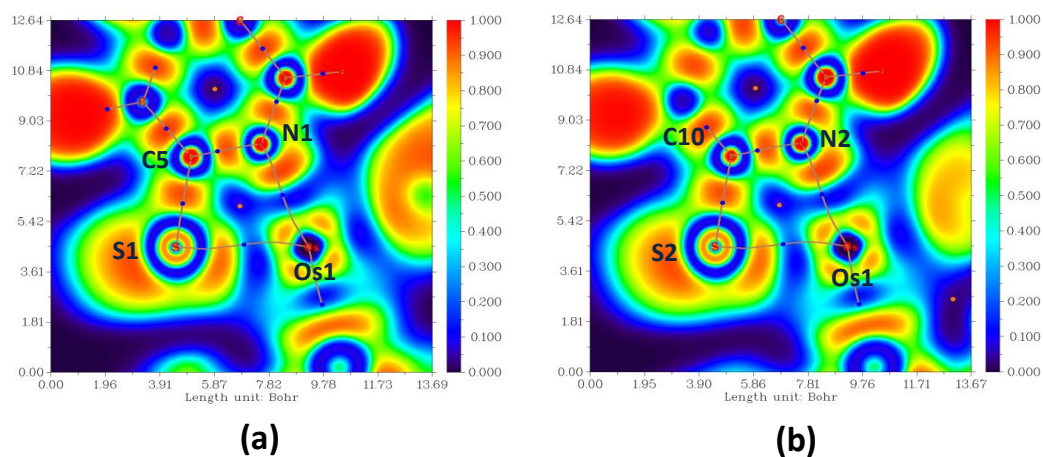

**Figure S60.** ELF plot in the Os1-N1-C5-S1 (a) and Os1-N2-C10-S2 (b) planes of **2b**, respectively.

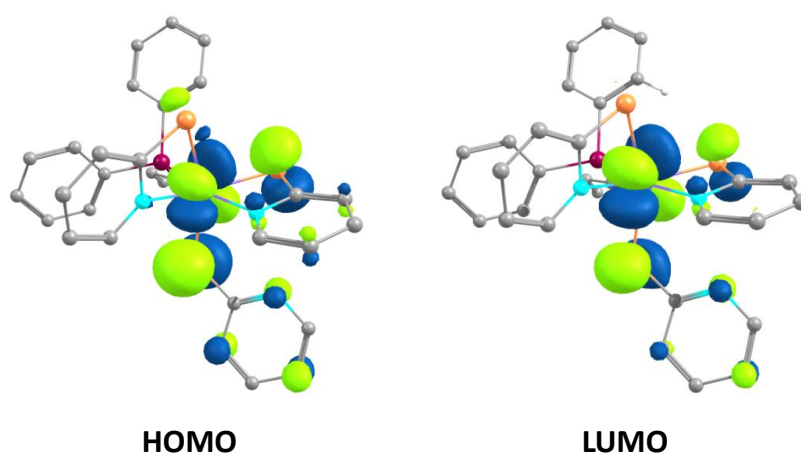

**Figure S61.** Selected molecular orbitals of **3a** (isocontour values:  $\pm 0.043$  [e.bohr<sup>-3</sup>]<sup>1/2</sup>).

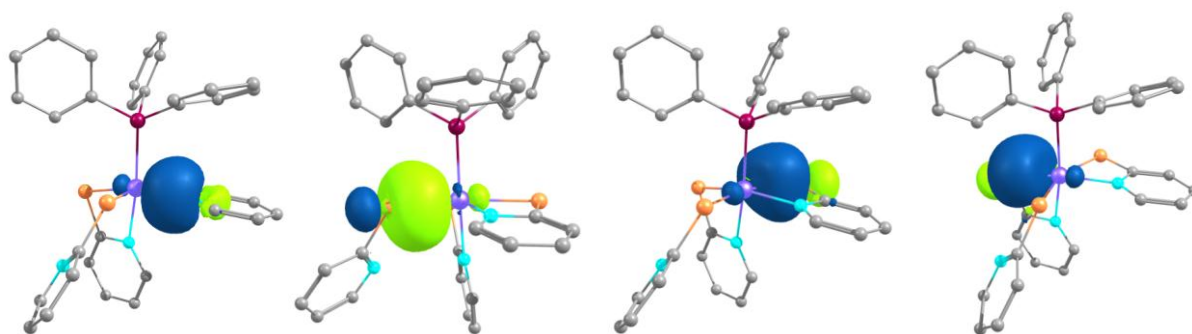

**Figure S62.** Selected NBOs of **3a** (isocontour values:  $\pm 0.043$  [e.bohr<sup>-3</sup>]<sup>1/2</sup>).

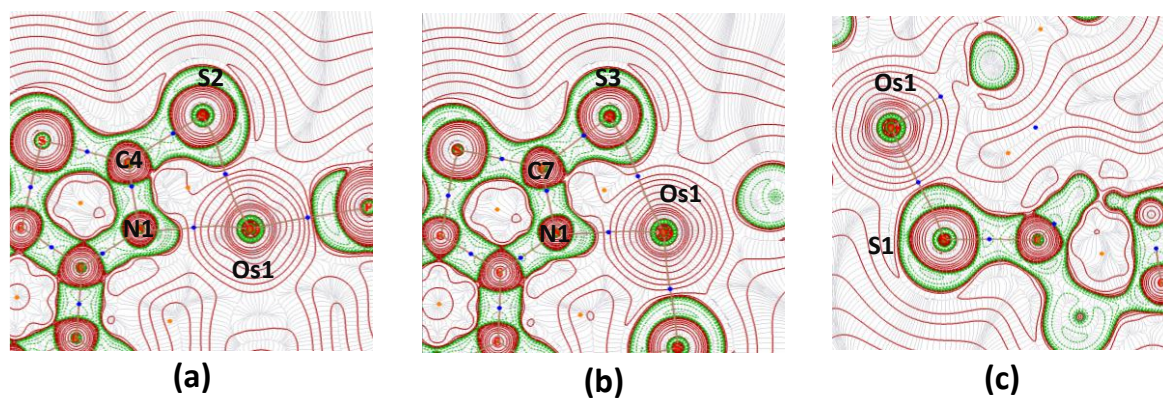

**Figure S63.** Contour-line diagram of the Laplacian of electron density in the Os1-N1-C4-S2 (a), Os1-N2-C8-S3 (b) planes and Os1-S1 (c) bond of **3a**, respectively. The solid brown lines are bond paths, while blue spheres indicate the bond critical points and orange sphere indicates ring critical points. Area of charge concentration [ $\nabla^2\rho(r)<0$ ] are indicated by solid lines and area of charge depletion [ $\nabla^2\rho(r)>0$ ] are shown by dashed lines.

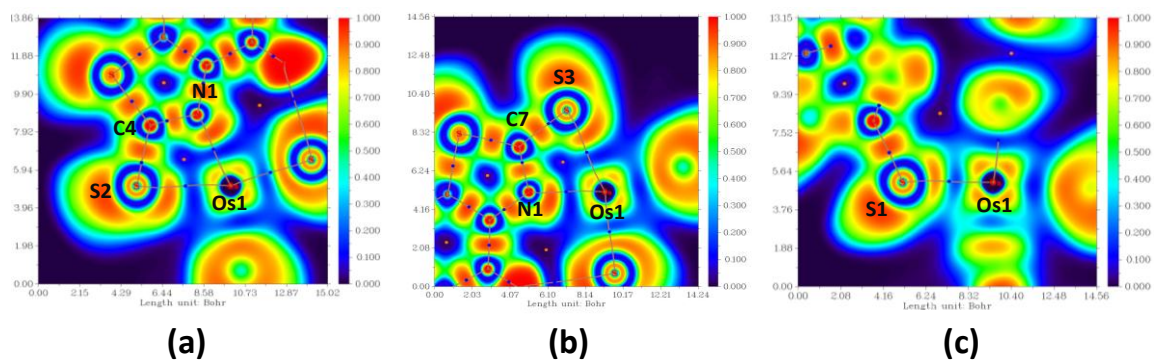

**Figure S64.** ELF plot in the Os1-N1-C5-S1 (a) and Os1-N2-C10-S2 (b) planes of **3a**, respectively.

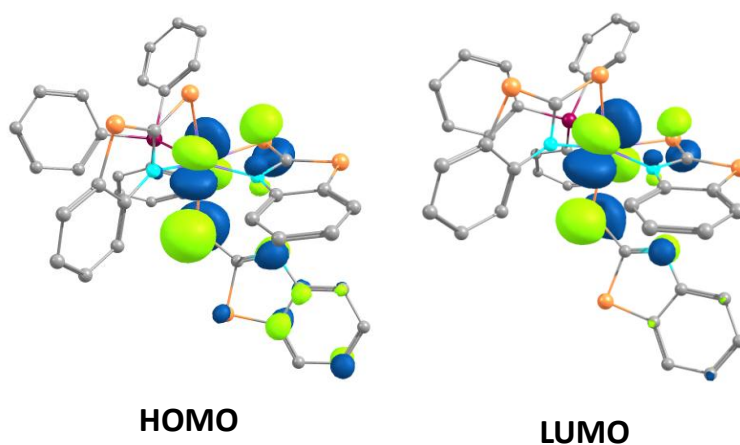

**Figure S65.** Selected molecular orbitals of **3b** (isocontour values:  $\pm 0.043$  [e.bohr<sup>-3</sup>]<sup>1/2</sup>).

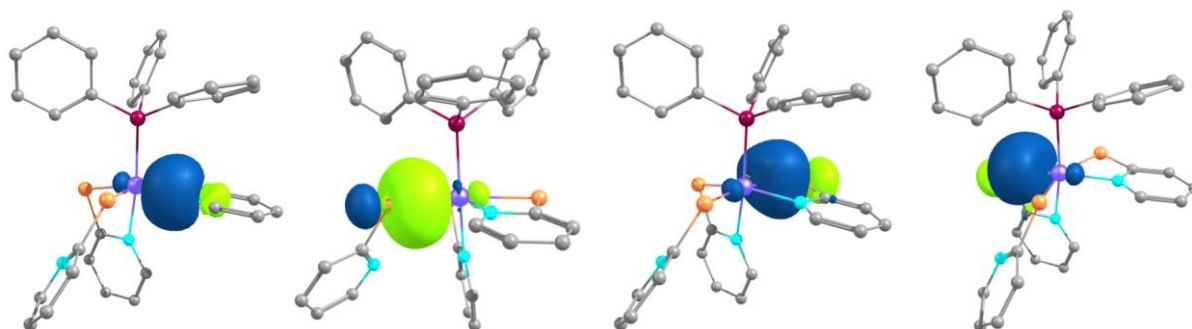

Figure S66. Selected NBOs of **3b** (isocontour values:  $\pm 0.043$  [e.bohr<sup>-3</sup>]<sup>1/2</sup>).

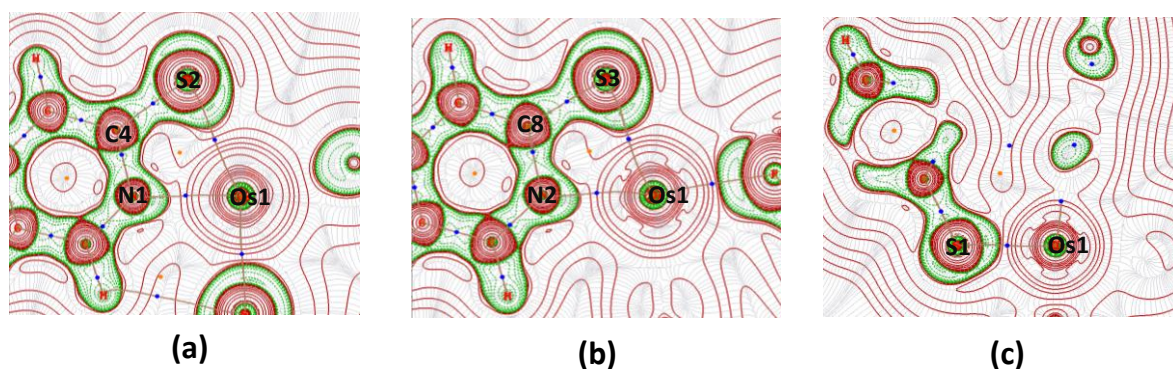

Figure S67. Contour-line diagram of the Laplacian of electron density in the Os1-N1-C4-S2 (a), Os1-N2-C8-S3 (b) planes and Os1-S1 (c) bond of **3b**, respectively. The solid brown lines are bond paths, while blue spheres indicate the bond critical points and orange sphere indicates ring critical points. Area of charge concentration [ $\nabla^2\rho(r)<0$ ] are indicated by solid lines and area of charge depletion [ $\nabla^2\rho(r)>0$ ] are shown by dashed lines.

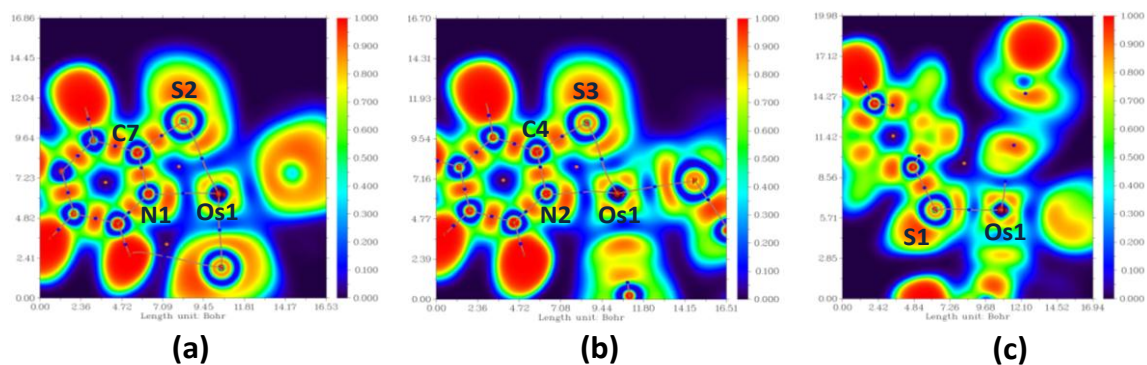

Figure S68. ELF plot in the Os1-N1-C5-S1 (a) and Os1-N2-C10-S2 (b) planes of **3b**, respectively.

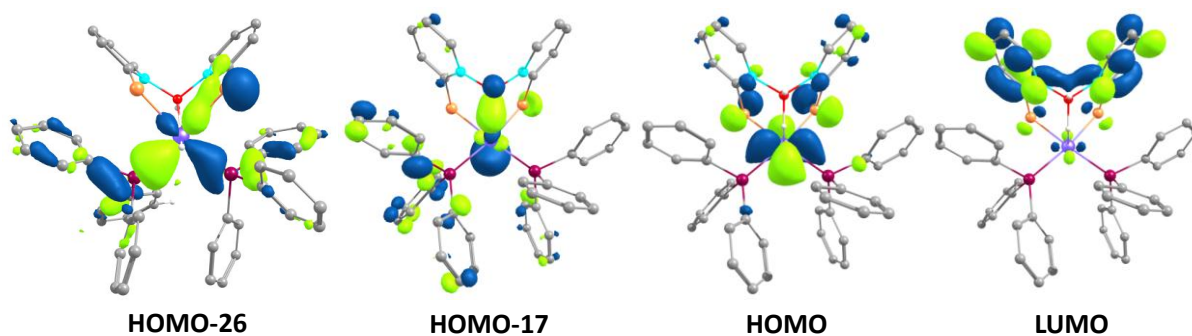

**Figure S69.** Selected molecular orbitals of **4a** (isocontour values:  $\pm 0.043$  [e.bohr<sup>-3</sup>]<sup>1/2</sup>).

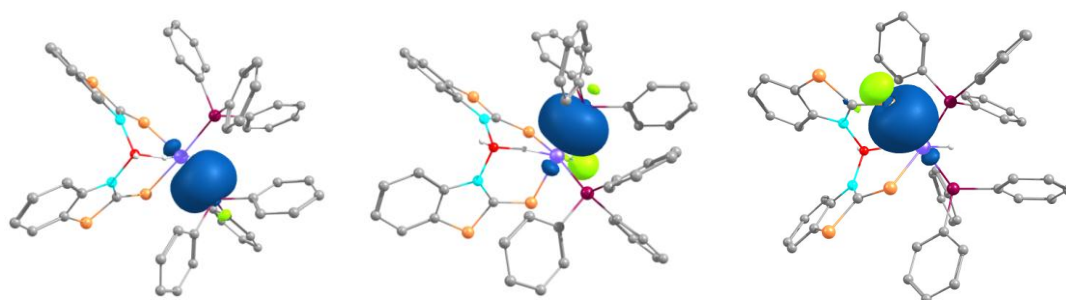

**Figure S70.** Selected NBOs of **4a** (isocontour values:  $\pm 0.043$  [e.bohr<sup>-3</sup>]<sup>1/2</sup>).

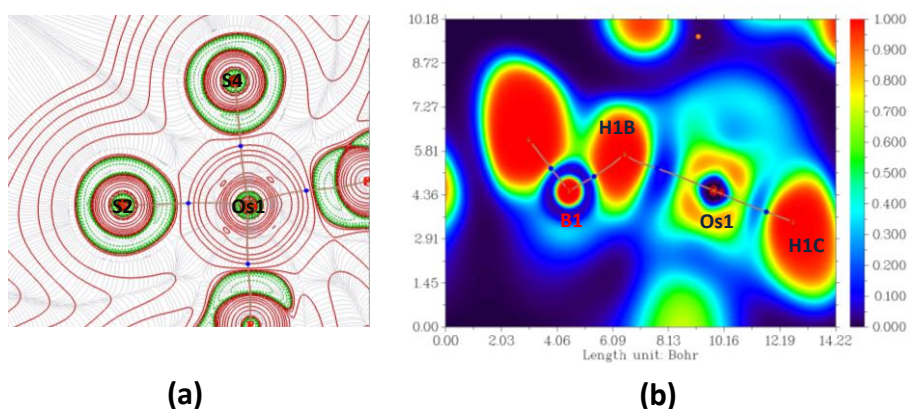

**Figure S71.** (a) Contour-line diagram of the Laplacian of electron density along Os-S and OS-P bonds in the Os1-S2-S1-P1-P2 planes and of **4a**. The solid brown lines are bond paths, while blue spheres indicate the bond critical points and orange sphere indicates ring critical points. Area of charge concentration [ $\nabla^2\rho(r)<0$ ] are indicated by solid lines and area of charge depletion [ $\nabla^2\rho(r)>0$ ] are shown by dashed lines.; (b) . ELF plot in the H1C-Os1-H2B-B1 plane.

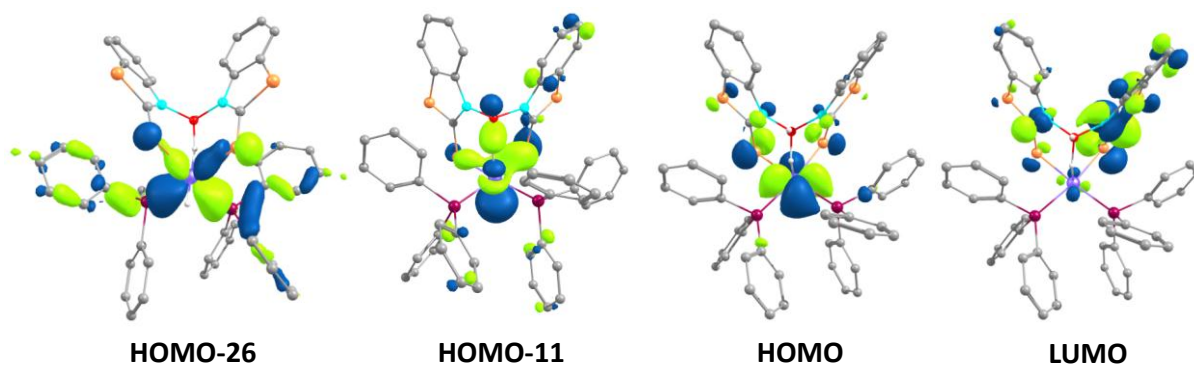

**Figure S72.** Selected molecular orbitals of **4b** (isocontour values:  $\pm 0.043$  [e.bohr<sup>-3</sup>]<sup>1/2</sup>).

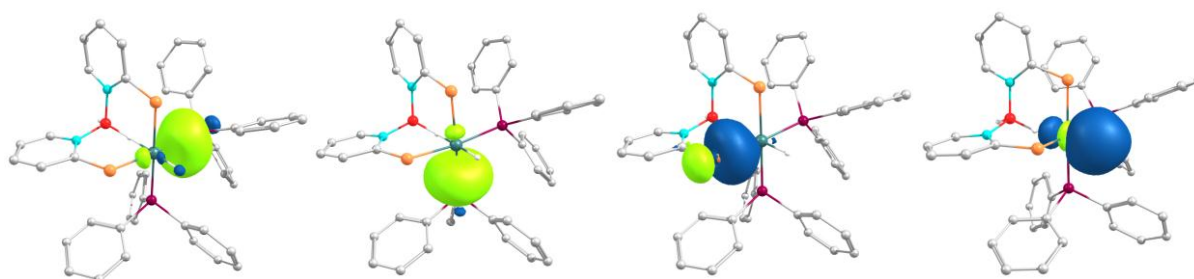

**Figure S73.** Selected NBOs of **4b** (isocontour values:  $\pm 0.043$  [e.bohr<sup>-3</sup>]<sup>1/2</sup>).

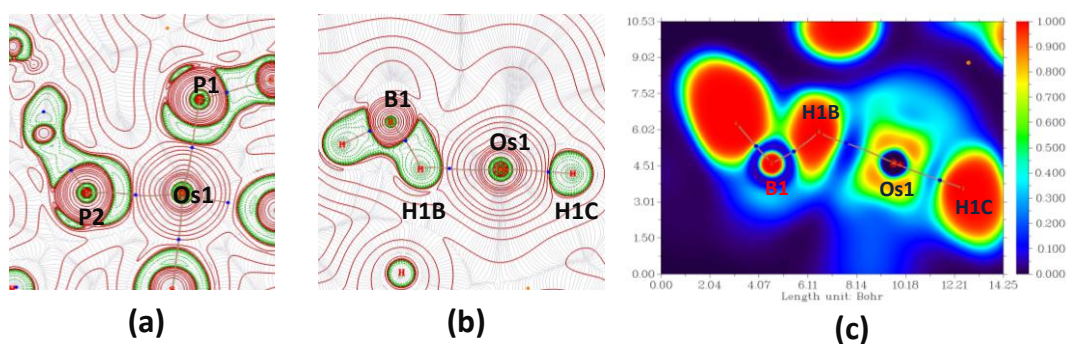

**Figure S74.** Contour-line diagram of the Laplacian of electron density along Os-S and OS-P bonds in the Os1-S2-S1-P1-P2 (a) and H1C-Os1-H2B-B1 (b) planes and of **4b**. The solid brown lines are bond paths, while blue spheres indicate the bond critical points and orange sphere indicates ring critical points. Area of charge concentration [ $\nabla^2\rho(r)<0$ ] are indicated by solid lines and area of charge depletion [ $\nabla^2\rho(r)>0$ ] are shown by dashed lines.; (c) ELF plot in the H1C-Os1-H2B-B1 plane of **4b**.



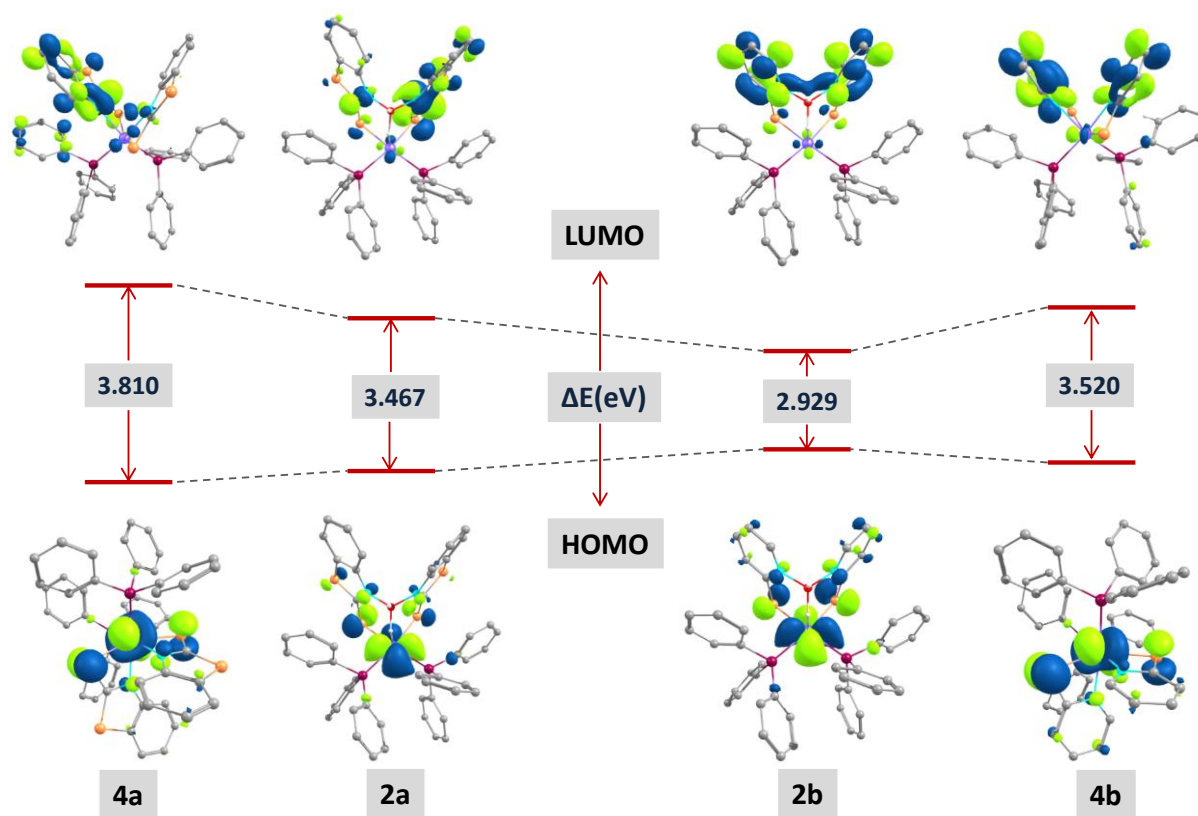

Figure S75. Comparison of HOMO-LUMO gap between 2a-b and 4a-b.

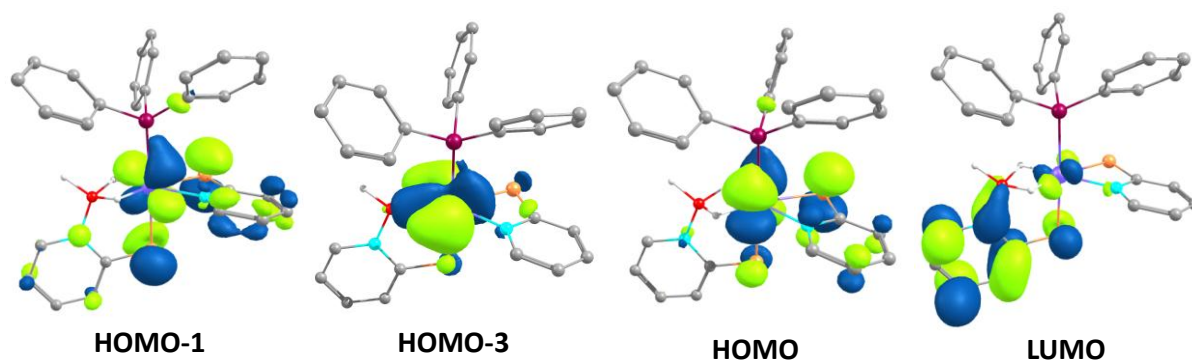

Figure S76. Selected molecular orbitals of 5' (isocontour values:  $\pm 0.043$  [e.bohr<sup>-3</sup>]<sup>1/2</sup>).

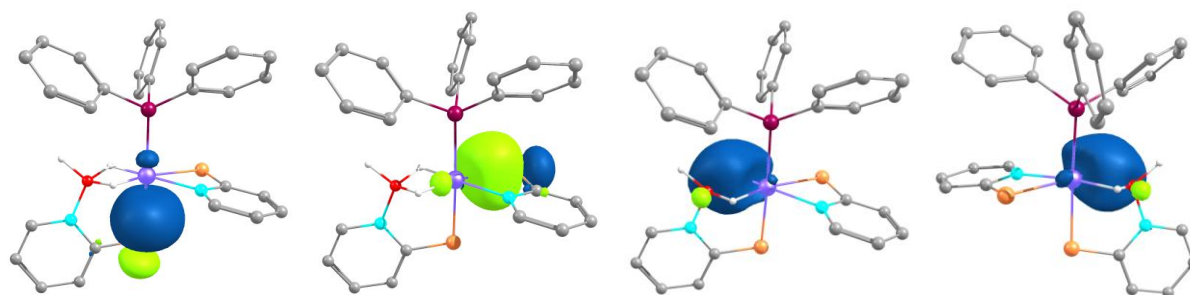

Figure S77. Selected NBOs of 5' (isocontour values:  $\pm 0.043$  [e.bohr<sup>-3</sup>]<sup>1/2</sup>).

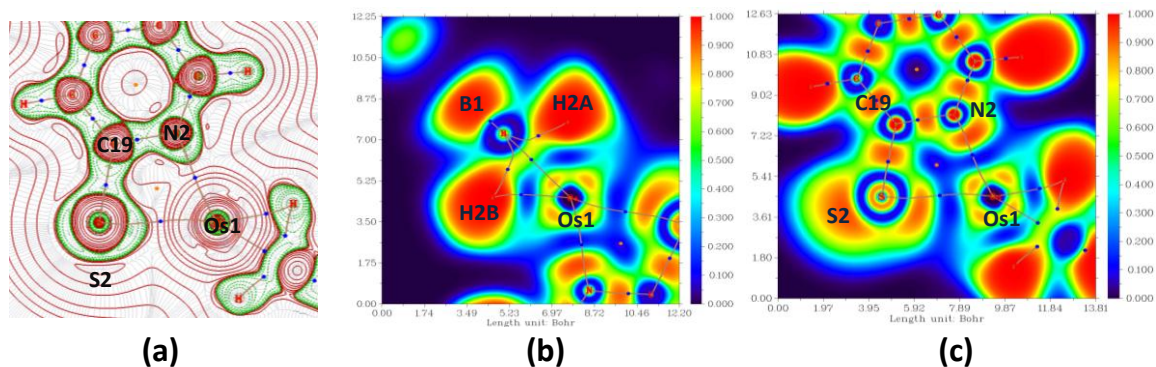

**Figure S78.** (a) Contour-line diagram of the Laplacian of electron density in the Os1-N2-C19-S2 plane of **5'**. The solid brown lines are bond paths, while blue spheres indicate the bond critical points and orange sphere indicates ring critical points. Area of charge concentration [ $\nabla^2\rho(r)<0$ ] are indicated by solid lines and area of charge depletion [ $\nabla^2\rho(r)>0$ ] are shown by dashed lines ; ELF plot in Os1-H2A-B1-H2B (b) and Os1-N2-C19-S2 (c) planes of **5'**.

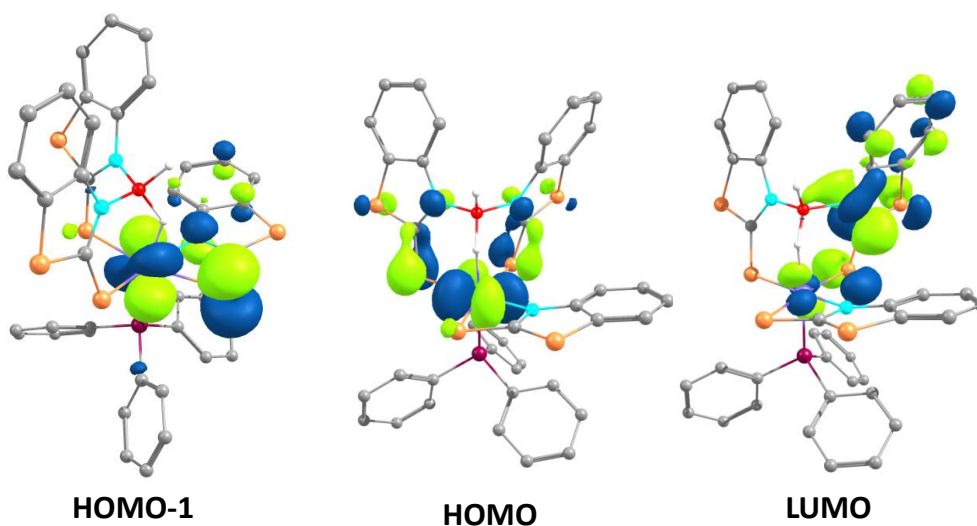

**Figure S79.** Selected molecular orbitals of *trans*-**6** (isocontour values:  $\pm 0.043$  [e.bohr<sup>-3</sup>]<sup>1/2</sup>).

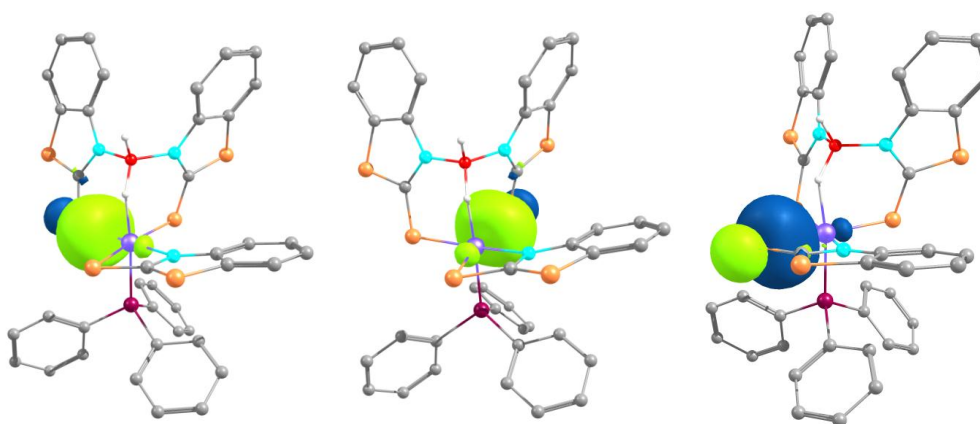

**Figure S80.** Selected NBOs of *trans*-**6** (isocontour values:  $\pm 0.043$  [e.bohr<sup>-3</sup>]<sup>1/2</sup>).

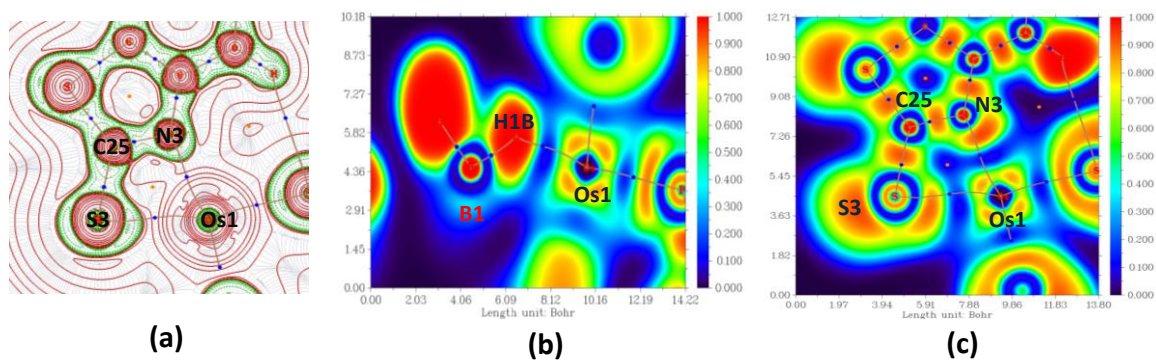

**Figure S81.** (a) Contour-line diagram of the Laplacian of electron density in the Os1-N3-C25-S3 plane of *trans*-6. The solid brown lines are bond paths, while blue spheres indicate the bond critical points and orange sphere indicates ring critical points. Area of charge concentration [ $\nabla^2\rho(r) < 0$ ] are indicated by solid lines and area of charge depletion [ $\nabla^2\rho(r) > 0$ ] are shown by dashed lines; ELF plot in Os1-H1B-B1 (b) and the Os1-N3-C25-S3 (c) planes of *trans*-6, respectively.

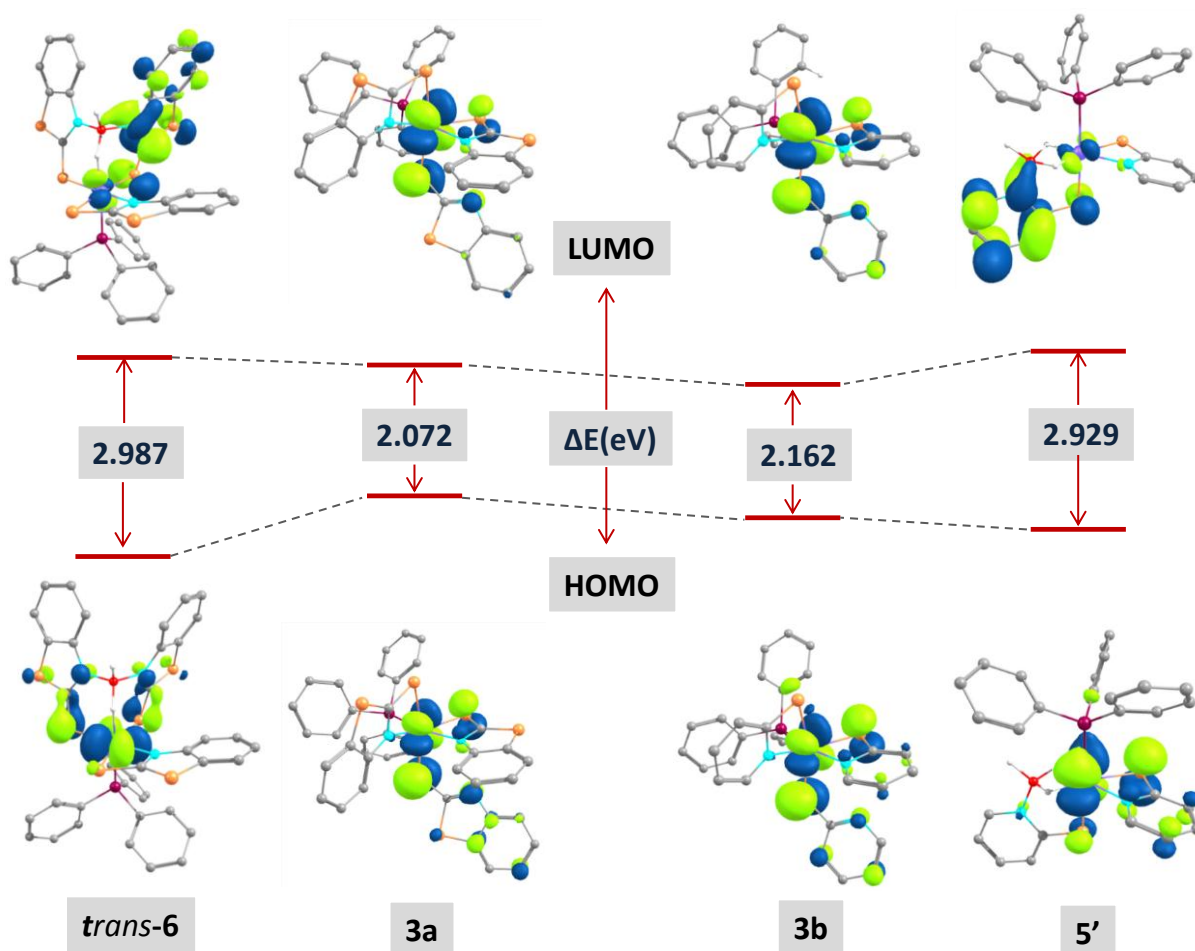

**Figure S82.** Comparison of HOMO-LUMO gap between 3a-b and 5', *trans*-6.

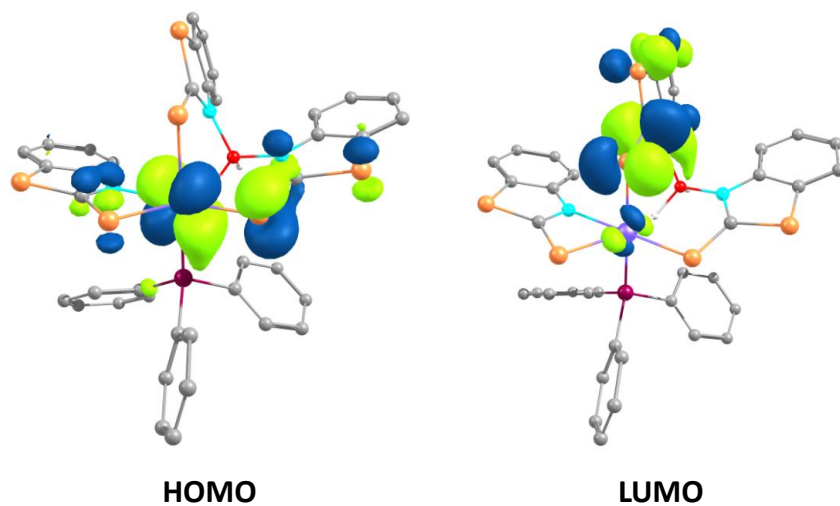

**Figure S83.** Selected molecular orbitals of *cis-6* (isocontour values:  $\pm 0.043$  [e.bohr<sup>-3</sup>]<sup>1/2</sup>).

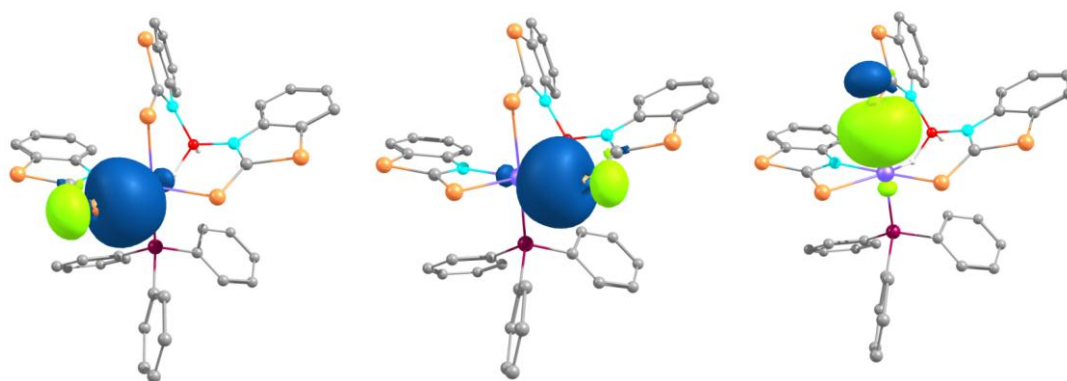

**Figure S84.** Selected NBOs of *cis-6* (isocontour values:  $\pm 0.043$  [e.bohr<sup>-3</sup>]<sup>1/2</sup>).

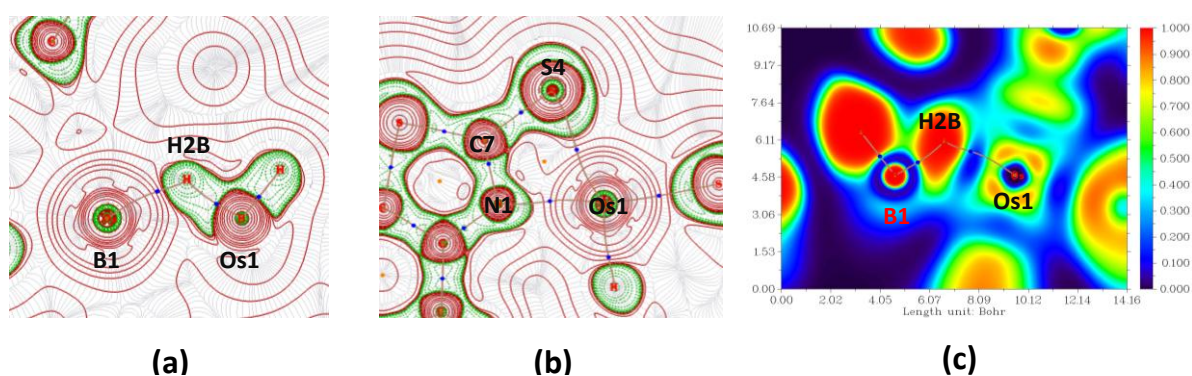

**Figure S85.** Contour-line diagram of the Laplacian of electron density in the Os1-H2B-B1 (a) and Os1-N1-C7-S4 (b) planes of *cis-6*, respectively. The solid brown lines are bond paths, while blue spheres indicate the bond critical points and orange sphere indicates ring critical points. Area of charge concentration [ $\nabla^2\rho(r)<0$ ] are indicated by solid lines and area of charge depletion [ $\nabla^2\rho(r)>0$ ] are shown by dashed lines ; (c) ELF plot in Os1H2BB1 of *cis-6*.

#### IV Cartesian Coordinates of all Optimized Structures

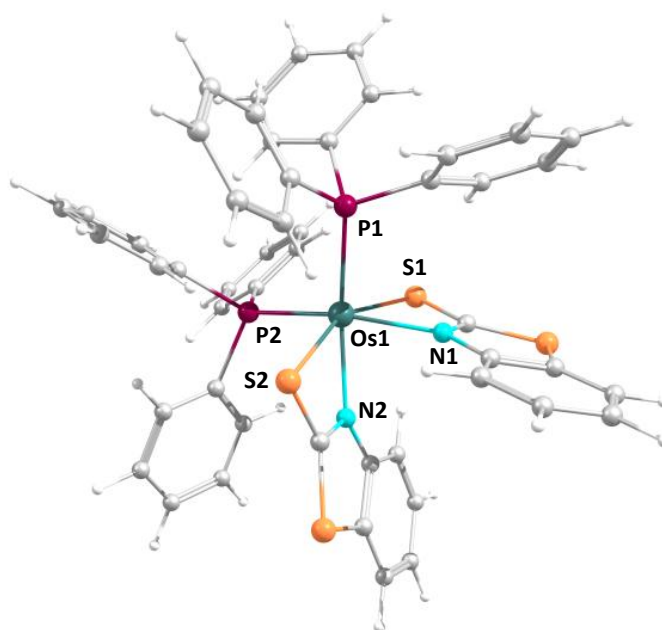

**Figure S86.** Optimized geometry of **2a**.

Total energy = -4405.03037684 a.u.

Cartesian coordinates for the calculated structure **2a** (in Å)

|    |              |              |              |   |              |              |              |
|----|--------------|--------------|--------------|---|--------------|--------------|--------------|
| Os | -0.277369000 | 0.031039000  | 0.019350000  | H | 1.562534000  | 2.279118000  | -4.957811000 |
| P  | 1.030701000  | -1.929131000 | 0.087659000  | C | 3.532202000  | 2.524497000  | -4.118010000 |
| P  | 1.412027000  | 1.697068000  | -0.021537000 | H | 4.007607000  | 2.728268000  | -5.071161000 |
| S  | -0.810590000 | -0.318831000 | -2.427751000 | C | 1.773100000  | -3.898476000 | 2.040234000  |
| S  | -0.859861000 | 0.378308000  | 2.447690000  | H | 1.604701000  | -4.638249000 | 1.268007000  |
| C  | 2.301175000  | 1.988083000  | -1.641701000 | C | 0.179813000  | 3.709223000  | 1.549135000  |
| N  | -2.094438000 | -1.165758000 | -0.369182000 | H | 0.133193000  | 2.942216000  | 2.311992000  |
| C  | 1.562385000  | -2.536592000 | 1.770810000  | C | -0.858144000 | -4.038009000 | 0.266615000  |
| C  | 2.608364000  | -2.084623000 | -0.904523000 | H | -1.054576000 | -3.655026000 | 1.260255000  |
| N  | -1.841342000 | 1.534406000  | 0.372102000  | C | 0.799716000  | 4.439707000  | -0.655276000 |
| C  | 3.722344000  | 0.551981000  | 1.132355000  | H | 1.239602000  | 4.260593000  | -1.626401000 |
| H  | 3.526035000  | -0.265917000 | 0.454248000  | C | -2.781113000 | 2.367512000  | -0.214989000 |
| C  | -2.144090000 | -1.108056000 | -1.687331000 | C | 4.281892000  | 2.521416000  | -2.944772000 |
| C  | 0.112564000  | -3.430994000 | -0.541401000 | H | 5.346810000  | 2.724029000  | -2.978295000 |
| C  | 1.786256000  | -1.616121000 | 2.799272000  | C | 3.186042000  | 2.713849000  | 2.027887000  |
| H  | 1.634315000  | -0.562034000 | 2.616765000  | H | 2.572109000  | 3.602182000  | 2.061224000  |
| C  | 2.868640000  | 1.662556000  | 1.158300000  | C | 2.203064000  | -2.037528000 | 4.061587000  |
| C  | 2.686076000  | -1.450976000 | -2.150761000 | H | 2.364960000  | -1.303330000 | 4.842683000  |
| H  | 1.853884000  | -0.857201000 | -2.501012000 | C | -4.169202000 | -2.174667000 | -0.774126000 |
| C  | -1.999738000 | 1.413998000  | 1.677123000  | C | 1.556739000  | 2.005336000  | -2.828848000 |
| C  | 3.704813000  | -2.845315000 | -0.474828000 | H | 0.490608000  | 1.823459000  | -2.798610000 |
| H  | 3.683244000  | -3.340243000 | 0.486826000  | C | 3.821200000  | -1.579311000 | -2.949507000 |
| C  | -3.224063000 | -1.751846000 | 0.186815000  | H | 3.856384000  | -1.077850000 | -3.909925000 |
| C  | 3.672171000  | 2.261293000  | -1.717370000 | C | 4.905207000  | -2.335689000 | -2.510978000 |
| H  | 4.276648000  | 2.274355000  | -0.820940000 | H | 5.791510000  | -2.431066000 | -3.128493000 |
| C  | 2.162914000  | 2.270576000  | -4.054725000 | C | 0.747847000  | 3.418084000  | 0.299702000  |

|   |              |              |              |   |              |              |              |
|---|--------------|--------------|--------------|---|--------------|--------------|--------------|
| C | 4.848136000  | 0.486488000  | 1.948638000  | C | -0.266507000 | 5.984670000  | 0.869332000  |
| H | 5.491640000  | -0.384829000 | 1.900580000  | H | -0.658488000 | 6.971800000  | 1.087704000  |
| C | 0.333135000  | -3.951140000 | -1.821096000 | C | 2.403289000  | -3.390957000 | 4.317430000  |
| H | 1.072919000  | -3.504979000 | -2.472086000 | H | 2.720668000  | -3.720848000 | 5.300551000  |
| C | 2.188191000  | -4.320948000 | 3.300943000  | S | -3.596567000 | -1.799224000 | -2.399120000 |
| H | 2.339106000  | -5.378496000 | 3.488347000  | C | -5.358024000 | -2.796649000 | -0.403632000 |
| C | -0.319632000 | 4.977309000  | 1.831811000  | C | -3.484679000 | -1.961717000 | 1.545204000  |
| H | -0.753766000 | 5.174880000  | 2.805673000  | C | -4.673879000 | -2.580490000 | 1.913225000  |
| C | -1.575365000 | -5.142371000 | -0.184058000 | C | -5.604618000 | -2.995952000 | 0.952102000  |
| H | -2.320134000 | -5.595707000 | 0.460481000  | H | -6.074621000 | -3.116598000 | -1.150798000 |
| C | 5.142420000  | 1.531719000  | 2.821851000  | H | -6.526186000 | -3.474166000 | 1.262946000  |
| H | 6.015712000  | 1.481697000  | 3.462749000  | H | -4.884156000 | -2.741455000 | 2.964449000  |
| C | 4.843758000  | -2.965368000 | -1.269255000 | H | -2.766323000 | -1.631874000 | 2.284190000  |
| H | 5.683166000  | -3.553663000 | -0.914516000 | S | -3.349956000 | 2.332870000  | 2.334674000  |
| C | -3.702097000 | 2.914235000  | 0.705944000  | C | -4.715111000 | 3.776538000  | 0.296586000  |
| C | -1.340846000 | -5.657718000 | -1.458387000 | C | -2.885452000 | 2.691890000  | -1.570992000 |
| H | -1.898301000 | -6.518642000 | -1.810447000 | C | -4.804842000 | 4.092716000  | -1.056408000 |
| C | 0.294215000  | 5.709850000  | -0.373493000 | C | -3.897868000 | 3.552468000  | -1.977663000 |
| H | 0.344571000  | 6.482954000  | -1.132394000 | H | -3.988852000 | 3.807212000  | -3.027362000 |
| C | -0.388161000 | -5.055919000 | -2.275274000 | H | -5.587344000 | 4.760493000  | -1.397434000 |
| H | -0.199221000 | -5.443929000 | -3.270202000 | H | -5.417388000 | 4.190028000  | 1.010651000  |
| C | 4.306573000  | 2.644158000  | 2.856821000  | H | -2.192352000 | 2.257488000  | -2.279207000 |
| H | 4.526069000  | 3.470511000  | 3.524115000  |   |              |              |              |

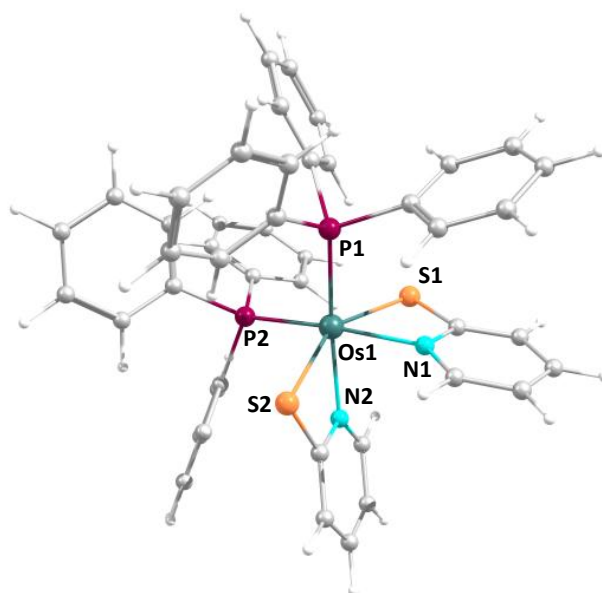

**Figure S87.** Optimized geometry of **2b**.

Total energy = -3456.12698883 a.u.

Cartesian coordinates for the calculated structure **2b** (in Å)

|    |              |              |              |   |              |              |              |
|----|--------------|--------------|--------------|---|--------------|--------------|--------------|
| Os | -0.016575000 | -0.829918000 | 0.005001000  | H | -2.276699000 | -3.751887000 | 3.259831000  |
| P  | -1.772439000 | 0.748396000  | -0.179520000 | C | 3.707253000  | -0.793528000 | -1.413809000 |
| P  | 1.833124000  | 0.670867000  | 0.136839000  | H | 2.912376000  | -0.837599000 | -2.148104000 |
| S  | -0.535890000 | -1.380699000 | 2.406276000  | C | -4.110093000 | -0.770722000 | -0.714577000 |
| S  | 0.325287000  | -1.541462000 | -2.373108000 | H | -3.676239000 | -0.920273000 | -1.696149000 |
| C  | 2.203601000  | 1.462179000  | 1.792060000  | C | 4.540011000  | -0.112792000 | 0.736148000  |
| N  | -1.430996000 | -2.436280000 | 0.271218000  | H | 4.415467000  | 0.383445000  | 1.688533000  |
| C  | -2.126996000 | 1.446842000  | -1.872902000 | C | 1.941269000  | -3.344306000 | 0.608872000  |
| C  | -1.812690000 | 2.271623000  | 0.906750000  | H | 1.933223000  | -3.066669000 | 1.655674000  |
| N  | 1.283495000  | -2.523244000 | -0.222579000 | C | 3.050521000  | 3.270476000  | 3.178159000  |
| C  | 1.057969000  | 3.231977000  | -0.775868000 | H | 3.446895000  | 4.277116000  | 3.255175000  |
| H  | 0.358351000  | 3.198609000  | 0.047313000  | C | 2.836479000  | 2.258504000  | -2.062517000 |
| C  | -1.500621000 | -2.599533000 | 1.617418000  | H | 3.547131000  | 1.467742000  | -2.255200000 |
| C  | -3.441385000 | 0.016478000  | 0.233161000  | C | -1.334447000 | 2.028785000  | -4.094207000 |
| C  | -1.103039000 | 1.504467000  | -2.822631000 | H | -0.524405000 | 2.058397000  | -4.814027000 |
| H  | -0.120703000 | 1.130355000  | -2.572141000 | C | -2.884107000 | -4.534440000 | 1.337247000  |
| C  | 1.936807000  | 2.161451000  | -0.994452000 | H | -3.458991000 | -5.356335000 | 1.749890000  |
| C  | -1.290034000 | 2.181262000  | 2.203173000  | C | -2.788053000 | -4.368510000 | -0.049792000 |
| H  | -0.857035000 | 1.249315000  | 2.539339000  | H | -3.279202000 | -5.048007000 | -0.734258000 |
| C  | 1.221655000  | -2.799970000 | -1.552844000 | C | 2.045873000  | 0.691790000  | 2.950859000  |
| C  | -2.365877000 | 3.492365000  | 0.495936000  | H | 1.672364000  | -0.320898000 | 2.876587000  |
| H  | -2.763067000 | 3.603736000  | -0.503791000 | C | -1.326228000 | 3.274890000  | 3.067229000  |
| C  | -2.051032000 | -3.304368000 | -0.543399000 | H | -0.912920000 | 3.179384000  | 4.064973000  |
| H  | -1.929697000 | -3.124122000 | -1.604414000 | C | -1.877617000 | 4.482890000  | 2.647518000  |
| C  | 2.725991000  | 2.755304000  | 1.923462000  | H | -1.900314000 | 5.336252000  | 3.316346000  |
| H  | 2.888639000  | 3.370041000  | 1.048795000  | C | 3.491440000  | -0.139168000 | -0.191827000 |
| C  | 2.376673000  | 1.202192000  | 4.204579000  | C | 1.825699000  | -3.948292000 | -2.077669000 |
| H  | 2.244278000  | 0.583494000  | 5.085401000  | H | 1.751259000  | -4.154566000 | -3.137978000 |
| C  | 2.874023000  | 2.498532000  | 4.324076000  | C | 1.076218000  | 4.358414000  | -1.592751000 |
| H  | 3.127818000  | 2.900274000  | 5.298934000  | H | 0.386955000  | 5.171652000  | -1.394479000 |
| C  | -3.396444000 | 1.928736000  | -2.231557000 | C | -4.029886000 | 0.186826000  | 1.490878000  |
| H  | -4.214948000 | 1.884594000  | -1.523853000 | H | -3.537789000 | 0.784552000  | 2.246569000  |
| C  | -2.236055000 | -3.648546000 | 2.183051000  | C | 2.578047000  | -4.487156000 | 0.149762000  |

|   |              |              |              |   |              |              |              |
|---|--------------|--------------|--------------|---|--------------|--------------|--------------|
| H | 3.109076000  | -5.125434000 | 0.843894000  | C | -5.923562000 | -1.164759000 | 0.831819000  |
| C | -3.628618000 | 2.453007000  | -3.500658000 | H | -6.884205000 | -1.613173000 | 1.060039000  |
| H | -4.617859000 | 2.815644000  | -3.758320000 | C | 5.764386000  | -0.718820000 | 0.451328000  |
| C | 4.931659000  | -1.391868000 | -1.700356000 | H | 6.559512000  | -0.684410000 | 1.188253000  |
| H | 5.072636000  | -1.888633000 | -2.654078000 | C | -5.261088000 | -0.398611000 | 1.786871000  |
| C | -5.340986000 | -1.351121000 | -0.421032000 | H | -5.701570000 | -0.248494000 | 2.766533000  |
| H | -5.844728000 | -1.949144000 | -1.172670000 | C | 2.847980000  | 3.382967000  | -2.889680000 |
| C | 1.970195000  | 4.437834000  | -2.659005000 | H | 3.555274000  | 3.431499000  | -3.710597000 |
| H | 1.983787000  | 5.312834000  | -3.299357000 | C | 5.967141000  | -1.357896000 | -0.768004000 |
| C | -2.394926000 | 4.587678000  | 1.357489000  | H | 6.919993000  | -1.825756000 | -0.989971000 |
| H | -2.821953000 | 5.524702000  | 1.016362000  | C | -2.596421000 | 2.504787000  | -4.437276000 |
| C | 2.511563000  | -4.790659000 | -1.215027000 | H | -2.778656000 | 2.907760000  | -5.427565000 |
| H | 2.993995000  | -5.683101000 | -1.598564000 |   |              |              |              |

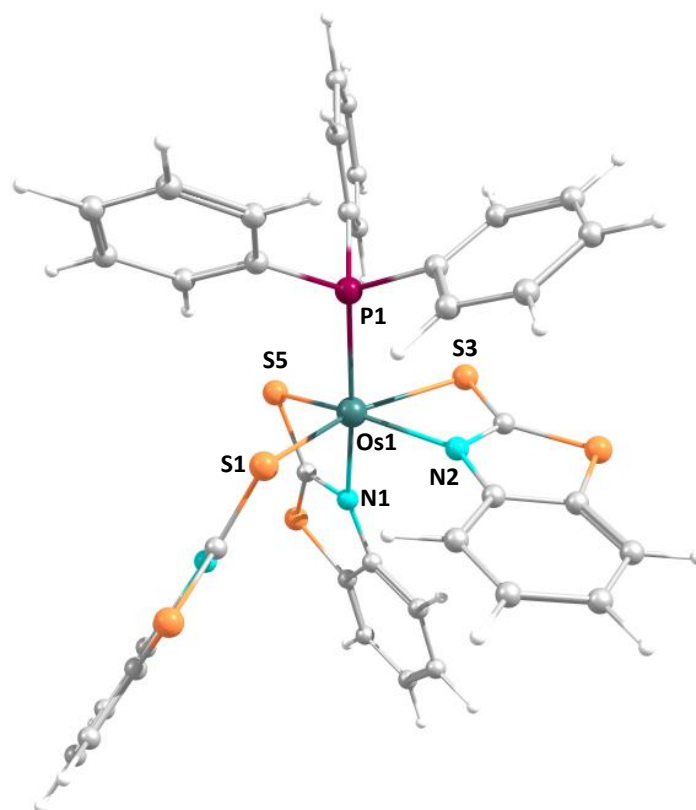

**Figure S88.** Optimized geometry of **3a**.

Total energy = -4488.96109316 a.u.

Cartesian coordinates for the calculated structure **3a** (in Å)

|   |             |              |              |   |              |             |              |
|---|-------------|--------------|--------------|---|--------------|-------------|--------------|
| C | 2.408433000 | -1.209489000 | 1.411572000  | C | 2.709419000  | 1.274223000 | -1.573502000 |
| C | 4.486950000 | -1.707898000 | 0.828006000  | C | 2.885722000  | 2.448636000 | -0.836829000 |
| C | 5.554509000 | -2.026507000 | -0.021839000 | H | 2.163227000  | 2.726315000 | -0.080571000 |
| H | 5.380193000 | -2.090425000 | -1.088928000 | C | 4.003852000  | 3.233157000 | -1.088655000 |
| C | 6.808977000 | -2.255804000 | 0.525545000  | H | 4.152119000  | 4.144839000 | -0.521768000 |
| H | 7.640479000 | -2.503946000 | -0.124172000 | C | 4.943781000  | 2.864548000 | -2.060900000 |
| C | 7.017233000 | -2.172859000 | 1.911150000  | H | 5.808040000  | 3.493112000 | -2.240148000 |
| H | 8.005388000 | -2.355576000 | 2.317602000  | C | 4.783184000  | 1.695485000 | -2.798840000 |
| C | 5.970932000 | -1.861071000 | 2.773211000  | H | 5.511509000  | 1.407978000 | -3.547591000 |
| H | 6.134968000 | -1.801001000 | 3.842474000  | C | 3.664168000  | 0.906645000 | -2.546476000 |
| C | 4.709763000 | -1.630501000 | 2.223922000  | C | -1.079270000 | 2.511761000 | -0.915913000 |
| C | 1.789403000 | -0.658048000 | -2.276497000 | C | -0.403761000 | 2.788810000 | 1.228846000  |



|   |              |              |              |    |              |              |              |
|---|--------------|--------------|--------------|----|--------------|--------------|--------------|
| C | 0.116889000  | 2.485606000  | 2.490734000  | H  | -3.673090000 | 2.315174000  | 3.636908000  |
| H | 0.418339000  | 1.471340000  | 2.715796000  | H  | -6.124057000 | 2.443391000  | 0.113140000  |
| C | 0.241794000  | 3.505699000  | 3.427195000  | H  | -5.590436000 | 3.284109000  | 2.387701000  |
| H | 0.648782000  | 3.278557000  | 4.405753000  | C  | -3.445573000 | -1.574231000 | -1.299490000 |
| C | -0.143452000 | 4.818545000  | 3.127470000  | C  | -3.057168000 | -1.516271000 | -2.640179000 |
| H | -0.036189000 | 5.597273000  | 3.873381000  | C  | -4.656234000 | -2.206129000 | -0.976140000 |
| C | -0.658478000 | 5.135608000  | 1.873445000  | C  | -3.861569000 | -2.069504000 | -3.637446000 |
| H | -0.952497000 | 6.150715000  | 1.634597000  | H  | -2.121494000 | -1.051497000 | -2.913275000 |
| C | -0.780673000 | 4.117227000  | 0.932526000  | C  | -5.460958000 | -2.751512000 | -1.971118000 |
| N | -0.600166000 | 1.916548000  | 0.164434000  | H  | -4.972631000 | -2.280927000 | 0.057214000  |
| N | 1.669503000  | 0.368660000  | -1.463292000 | C  | -5.065360000 | -2.683807000 | -3.307458000 |
| N | 3.188680000  | -1.467422000 | 0.414456000  | H  | -3.539869000 | -2.017784000 | -4.671456000 |
| P | -2.388831000 | -0.870099000 | 0.059359000  | H  | -6.393457000 | -3.235118000 | -1.702144000 |
| S | 0.668505000  | -0.940755000 | 1.430384000  | H  | -5.689846000 | -3.113508000 | -4.082792000 |
| S | 3.205401000  | -1.230255000 | 3.023741000  | C  | -2.454634000 | -2.284484000 | 1.261253000  |
| S | -1.275642000 | 1.506203000  | -2.288739000 | C  | -1.636940000 | -3.392803000 | 1.000036000  |
| S | -1.370764000 | 4.233273000  | -0.725695000 | C  | -3.322793000 | -2.330856000 | 2.356845000  |
| S | 3.204625000  | -0.619040000 | -3.306982000 | C  | -1.689479000 | -4.519567000 | 1.814049000  |
| S | 0.482368000  | -1.790460000 | -2.131973000 | H  | -0.951056000 | -3.376006000 | 0.161721000  |
| C | -3.471488000 | 0.428421000  | 0.808991000  | C  | -3.367361000 | -3.458807000 | 3.177611000  |
| C | -3.161467000 | 0.928424000  | 2.081469000  | H  | -3.971329000 | -1.493155000 | 2.578210000  |
| C | -4.541365000 | 0.991877000  | 0.105434000  | C  | -2.553085000 | -4.554976000 | 2.908490000  |
| C | -3.924153000 | 1.944562000  | 2.649561000  | H  | -1.048494000 | -5.366644000 | 1.597434000  |
| H | -2.321477000 | 0.525303000  | 2.635271000  | H  | -4.042798000 | -3.476224000 | 4.025857000  |
| C | -5.298896000 | 2.016785000  | 0.672458000  | H  | -2.588797000 | -5.430907000 | 3.546531000  |
| H | -4.787612000 | 0.635805000  | -0.886563000 | Os | -0.237367000 | -0.097687000 | -0.551223000 |
| C | -4.998116000 | 2.490197000  | 1.946695000  |    |              |              |              |

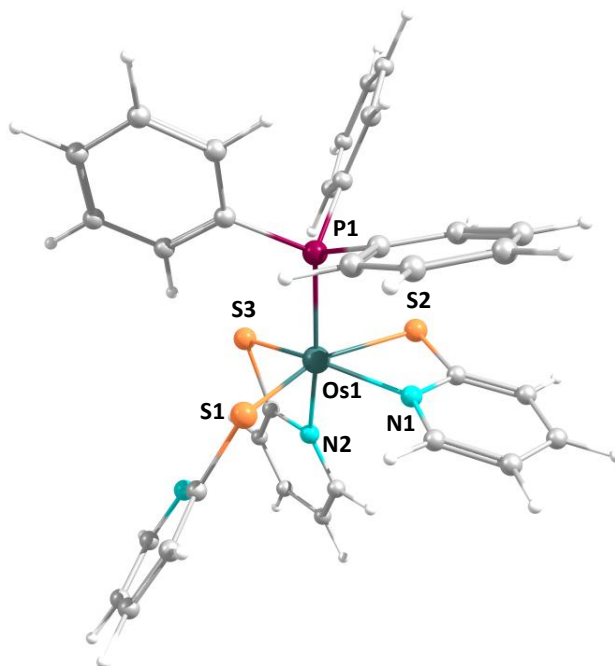

**Figure S89.** Optimized geometry of **3b**.

Total energy = -3065.59923664 a.u.

Cartesian coordinates for the calculated structure **3b** (in Å)

|   |              |              |              |    |              |              |              |
|---|--------------|--------------|--------------|----|--------------|--------------|--------------|
| C | -2.955098000 | 1.413279000  | 1.503447000  | H  | 1.425478000  | 0.280379000  | -2.907885000 |
| C | -4.939916000 | 1.922308000  | 0.474980000  | C  | 5.220983000  | 0.044594000  | -2.212924000 |
| C | -5.577209000 | 2.203678000  | 1.678699000  | H  | 4.712002000  | 0.146551000  | -0.138177000 |
| C | -2.589418000 | -0.000004000 | -2.154158000 | C  | 4.752270000  | 0.037363000  | -3.525325000 |
| C | -3.373986000 | -1.691057000 | -0.749607000 | H  | 3.007267000  | 0.120961000  | -4.783627000 |
| C | -4.536416000 | -1.817285000 | -1.497226000 | H  | 6.284582000  | -0.027100000 | -2.013338000 |
| C | 0.117635000  | -2.994727000 | -0.051222000 | H  | 5.449102000  | -0.039554000 | -4.352595000 |
| C | -0.417811000 | -2.301970000 | 2.126235000  | C  | 1.963624000  | 2.314751000  | 0.281221000  |
| C | -0.274394000 | -3.590392000 | 2.611920000  | C  | 0.968346000  | 3.216627000  | -0.108074000 |
| N | -0.228973000 | -2.015132000 | 0.827020000  | C  | 3.166830000  | 2.817803000  | 0.796083000  |
| N | -2.429444000 | -0.801936000 | -1.072679000 | C  | 1.171767000  | 4.591144000  | 0.015505000  |
| N | -3.662332000 | 1.538335000  | 0.378103000  | H  | 0.029936000  | 2.849823000  | -0.500897000 |
| P | 1.726389000  | 0.494076000  | -0.007119000 | C  | 3.364766000  | 4.189151000  | 0.927206000  |
| S | -1.215642000 | 1.003928000  | 1.457908000  | H  | 3.955663000  | 2.142116000  | 1.103025000  |
| S | 0.295682000  | -2.339128000 | -1.651575000 | C  | 2.366386000  | 5.080947000  | 0.535021000  |
| S | -1.172073000 | 1.029177000  | -2.294315000 | H  | 0.388507000  | 5.275272000  | -0.291172000 |
| C | 2.521633000  | -0.297603000 | 1.462653000  | H  | 4.299468000  | 4.560666000  | 1.332684000  |
| C | 2.397554000  | 0.274770000  | 2.735118000  | H  | 2.521446000  | 6.149632000  | 0.634457000  |
| C | 3.123739000  | -1.557713000 | 1.345259000  | Os | -0.484739000 | -0.270123000 | -0.384951000 |
| C | 2.893542000  | -0.383913000 | 3.859172000  | C  | 0.272911000  | -4.320203000 | 0.379901000  |
| H | 1.915125000  | 1.237444000  | 2.853122000  | C  | 0.075578000  | -4.612531000 | 1.719082000  |
| C | 3.618625000  | -2.213504000 | 2.470303000  | H  | -0.689432000 | -1.465908000 | 2.757707000  |
| H | 3.208548000  | -2.029749000 | 0.373569000  | H  | -0.430375000 | -3.789201000 | 3.664086000  |
| C | 3.510578000  | -1.626515000 | 3.729931000  | H  | 0.190834000  | -5.630713000 | 2.074328000  |
| H | 2.797140000  | 0.077747000  | 4.835773000  | H  | 0.540704000  | -5.083994000 | -0.339027000 |
| H | 4.087891000  | -3.184901000 | 2.360509000  | C  | -3.511572000 | 1.670351000  | 2.772319000  |
| H | 3.900219000  | -2.135877000 | 4.604335000  | C  | -4.835669000 | 2.071087000  | 2.854207000  |
| C | 2.947369000  | 0.229412000  | -1.383121000 | H  | -5.477464000 | 2.010936000  | -0.465585000 |
| C | 2.486951000  | 0.219944000  | -2.704162000 | H  | -6.614537000 | 2.515397000  | 1.693984000  |
| C | 4.326018000  | 0.144344000  | -1.149816000 | H  | -5.285918000 | 2.276129000  | 3.819599000  |
| C | 3.383600000  | 0.128363000  | -3.766794000 | H  | -2.903116000 | 1.557112000  | 3.661159000  |

|   |              |              |              |   |              |              |              |
|---|--------------|--------------|--------------|---|--------------|--------------|--------------|
| C | -3.724137000 | -0.078794000 | -2.959370000 | H | -5.604074000 | -1.082986000 | -3.221364000 |
| C | -4.707740000 | -0.998268000 | -2.616968000 | H | -5.286940000 | -2.542077000 | -1.209786000 |
| H | -3.819816000 | 0.567325000  | -3.822445000 | H | -3.184135000 | -2.302299000 | 0.124235000  |

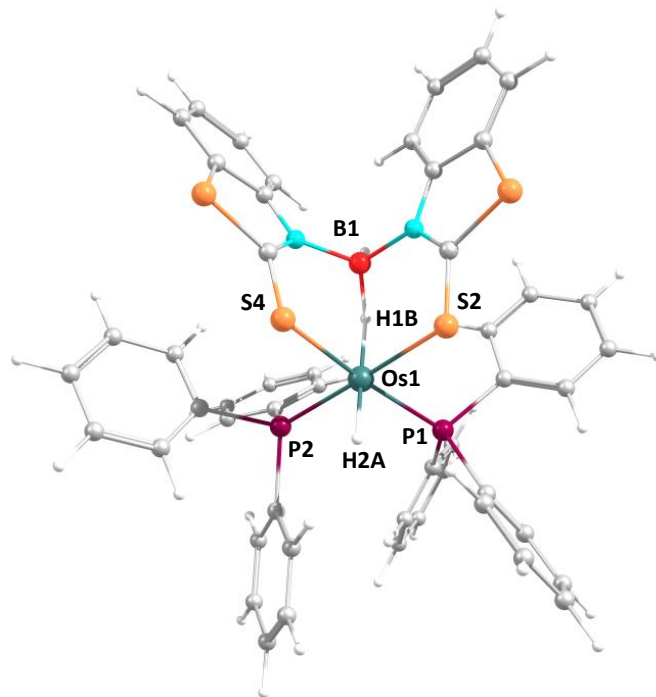

**Figure S90.** Optimized geometry of **4a**.

Total energy = -4431.72328713 a.u.

Cartesian coordinates for the calculated structure **4a** (in Å)

|    |             |              |              |   |              |              |              |
|----|-------------|--------------|--------------|---|--------------|--------------|--------------|
| Os | 0.352347000 | -0.073333000 | -0.843174000 | C | 0.946319000  | -3.150930000 | 0.799096000  |
| C  | 2.951066000 | -1.250503000 | 1.610810000  | C | 1.273945000  | -4.454719000 | 0.411328000  |
| C  | 2.721494000 | -1.743037000 | 2.901353000  | H | 2.069241000  | -4.627785000 | -0.300779000 |
| H  | 1.877013000 | -2.389342000 | 3.098017000  | C | 0.574963000  | -5.549170000 | 0.921345000  |
| C  | 3.585332000 | -1.429946000 | 3.951131000  | H | 0.841813000  | -6.549410000 | 0.597810000  |
| H  | 3.387568000 | -1.826931000 | 4.941021000  | C | -0.459703000 | -5.362424000 | 1.833546000  |
| C  | 4.699347000 | -0.625694000 | 3.729146000  | H | -1.001382000 | -6.214042000 | 2.229907000  |
| H  | 5.373957000 | -0.386927000 | 4.543889000  | C | -0.800725000 | -4.068455000 | 2.223870000  |
| C  | 4.943643000 | -0.136907000 | 2.446973000  | H | -1.611704000 | -3.905983000 | 2.925335000  |
| H  | 5.810563000 | 0.485103000  | 2.255066000  | C | -0.110203000 | -2.976253000 | 1.704151000  |
| C  | 4.078331000 | -0.444879000 | 1.400645000  | H | -0.407074000 | -1.978704000 | 2.002609000  |
| H  | 4.297364000 | -0.067839000 | 0.410718000  | C | -2.107239000 | -2.264737000 | -1.195527000 |
| C  | 3.104962000 | -2.400451000 | -0.988032000 | C | -3.880804000 | -2.168585000 | 0.262713000  |
| C  | 4.199005000 | -3.118305000 | -0.480639000 | C | -4.678095000 | -1.771126000 | 1.338988000  |
| H  | 4.340227000 | -3.208442000 | 0.589284000  | H | -4.392988000 | -0.933553000 | 1.953702000  |
| C  | 5.117875000 | -3.720269000 | -1.336716000 | C | -5.852882000 | -2.466300000 | 1.612358000  |
| H  | 5.958316000 | -4.266576000 | -0.922586000 | H | -6.467938000 | -2.150210000 | 2.446860000  |
| C  | 4.959050000 | -3.619681000 | -2.718445000 | C | -6.250041000 | -3.555153000 | 0.832409000  |
| H  | 5.675152000 | -4.086850000 | -3.385618000 | H | -7.169825000 | -4.081098000 | 1.059151000  |
| C  | 3.876048000 | -2.912894000 | -3.233834000 | C | -5.461446000 | -3.970234000 | -0.236494000 |
| H  | 3.741949000 | -2.826415000 | -4.306541000 | H | -5.750718000 | -4.818291000 | -0.845620000 |
| C  | 2.958404000 | -2.306664000 | -2.375573000 | C | -4.286989000 | -3.274108000 | -0.504415000 |
| H  | 2.132063000 | -1.742539000 | -2.785463000 | C | -2.572743000 | 1.431545000  | -1.344802000 |

|   |              |             |              |   |              |              |              |
|---|--------------|-------------|--------------|---|--------------|--------------|--------------|
| C | -4.643237000 | 2.431041000 | -0.359247000 | C | 0.554508000  | 5.302468000  | -2.374891000 |
| C | -5.772208000 | 3.130061000 | 0.056267000  | H | 1.032569000  | 5.800130000  | -3.211644000 |
| H | -6.341534000 | 3.727567000 | -0.645742000 | C | 1.144025000  | 4.163696000  | -1.825163000 |
| C | -6.140489000 | 3.060793000 | 1.397498000  | H | 2.073191000  | 3.800640000  | -2.244779000 |
| H | -7.013547000 | 3.601187000 | 1.743450000  | C | 3.092888000  | 2.238090000  | -0.377613000 |
| C | -5.371561000 | 2.319871000 | 2.299338000  | C | 3.621260000  | 1.791182000  | -1.596700000 |
| H | -5.644113000 | 2.301344000 | 3.348204000  | H | 2.988136000  | 1.234493000  | -2.275463000 |
| C | -4.248873000 | 1.612258000 | 1.878358000  | C | 4.951791000  | 2.033344000  | -1.934107000 |
| H | -3.643800000 | 1.067948000 | 2.589902000  | H | 5.336345000  | 1.675643000  | -2.882940000 |
| C | -3.892115000 | 1.639667000 | 0.527267000  | C | 5.785324000  | 2.720515000  | -1.053876000 |
| C | 1.114566000  | 2.341731000 | 1.791036000  | H | 6.822311000  | 2.904614000  | -1.312299000 |
| C | 0.785199000  | 1.327708000 | 2.693383000  | C | 5.274724000  | 3.161993000  | 0.164718000  |
| H | 0.634213000  | 0.323943000 | 2.323067000  | H | 5.914256000  | 3.690114000  | 0.863915000  |
| C | 0.639762000  | 1.594787000 | 4.054620000  | C | 3.941817000  | 2.925059000  | 0.498649000  |
| H | 0.387837000  | 0.789309000 | 4.735543000  | H | 3.579071000  | 3.263807000  | 1.459005000  |
| C | 0.816008000  | 2.888671000 | 4.535802000  | N | -2.665212000 | -1.590463000 | -0.163674000 |
| H | 0.700482000  | 3.099780000 | 5.593287000  | N | -2.791543000 | 1.002940000  | -0.077510000 |
| C | 1.135145000  | 3.914954000 | 3.646564000  | P | 1.837775000  | -1.636306000 | 0.154660000  |
| H | 1.264567000  | 4.929127000 | 4.008627000  | P | 1.279553000  | 1.935883000  | -0.024700000 |
| C | 1.280472000  | 3.644653000 | 2.288470000  | S | -3.886379000 | 2.445945000  | -1.946885000 |
| H | 1.506309000  | 4.459610000 | 1.611762000  | S | -1.193339000 | 1.169612000  | -2.271281000 |
| C | 0.553115000  | 3.503169000 | -0.743868000 | S | -3.105206000 | -3.605702000 | -1.754984000 |
| C | -0.649876000 | 4.008208000 | -0.232119000 | S | -0.617924000 | -2.015998000 | -1.948426000 |
| H | -1.131383000 | 3.517425000 | 0.605506000  | B | -2.088995000 | -0.276846000 | 0.512152000  |
| C | -1.235534000 | 5.147947000 | -0.775848000 | H | -2.329571000 | -0.334077000 | 1.682785000  |
| H | -2.163615000 | 5.523701000 | -0.359210000 | H | -0.835890000 | -0.226083000 | 0.558471000  |
| C | -0.634508000 | 5.801379000 | -1.850876000 | H | 1.413132000  | 0.050741000  | -2.057002000 |
| H | -1.089768000 | 6.689507000 | -2.274891000 |   |              |              |              |

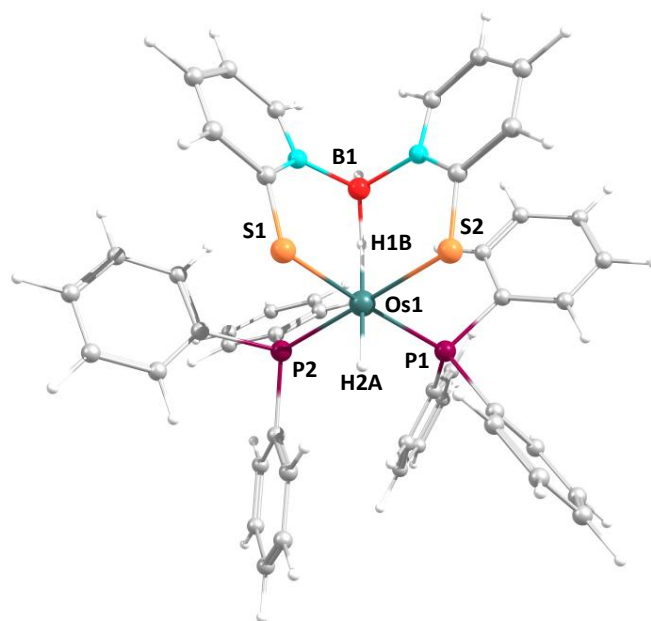

**Figure S91.** Optimized geometry of **4b**.

Total energy = -3482.80211904 a.u.

Cartesian coordinates for the calculated structure **4b** (in Å)

|   |              |              |              |   |              |              |              |
|---|--------------|--------------|--------------|---|--------------|--------------|--------------|
| s | 0.158274000  | 0.353974000  | -0.702398000 | C | -2.295895000 | 1.854943000  | 1.972392000  |
| C | -2.502828000 | -1.543199000 | 1.182515000  | H | -1.352079000 | 1.464776000  | 2.333472000  |
| C | -2.997803000 | -1.335320000 | 2.475381000  | C | -0.522599000 | 3.656190000  | -0.703163000 |
| H | -3.147127000 | -0.331438000 | 2.849092000  | C | 0.357181000  | 4.676213000  | 1.240717000  |
| C | -3.326936000 | -2.413886000 | 3.297466000  | C | -0.892561000 | 6.025939000  | -0.273967000 |
| H | -3.711096000 | -2.226945000 | 4.294576000  | C | 3.010761000  | 2.127107000  | -0.838290000 |
| C | -3.176021000 | -3.719226000 | 2.839013000  | C | 5.083879000  | 3.333358000  | -0.416529000 |
| H | -3.436961000 | -4.557272000 | 3.475862000  | C | 3.401986000  | 3.148770000  | 1.263887000  |
| C | -2.693047000 | -3.938557000 | 1.549794000  | C | 1.456931000  | -1.940764000 | 1.850534000  |
| H | -2.575336000 | -4.948866000 | 1.174698000  | C | 0.638301000  | -1.265883000 | 2.758123000  |
| C | -2.358949000 | -2.862530000 | 0.732430000  | H | -0.085143000 | -0.556757000 | 2.383033000  |
| H | -1.999650000 | -3.055407000 | -0.269936000 | C | 0.749690000  | -1.486029000 | 4.131038000  |
| C | -3.272735000 | -0.573085000 | -1.358441000 | H | 0.099720000  | -0.951527000 | 4.814991000  |
| C | -4.537516000 | -1.100433000 | -1.053905000 | C | 1.691354000  | -2.386373000 | 4.620023000  |
| H | -4.811826000 | -1.292808000 | -0.023806000 | H | 1.782170000  | -2.557878000 | 5.687067000  |
| C | -5.453522000 | -1.389690000 | -2.061862000 | C | 2.524279000  | -3.061687000 | 3.727547000  |
| H | -6.423879000 | -1.799635000 | -1.803482000 | H | 3.268957000  | -3.758025000 | 4.097773000  |
| C | -5.122368000 | -1.158178000 | -3.396773000 | C | 2.410279000  | -2.838742000 | 2.358011000  |
| H | -5.833780000 | -1.386287000 | -4.183027000 | H | 3.081706000  | -3.355638000 | 1.683289000  |
| C | -3.870417000 | -0.637479000 | -3.711334000 | C | 3.110599000  | -1.682657000 | -0.427687000 |
| H | -3.599360000 | -0.456594000 | -4.745777000 | C | 4.031913000  | -0.931379000 | 0.314702000  |
| C | -2.952769000 | -0.348829000 | -2.700536000 | H | 3.692641000  | -0.337549000 | 1.155613000  |
| H | -1.975404000 | 0.035980000  | -2.955738000 | C | 5.386538000  | -0.944223000 | -0.002629000 |
| C | -2.898763000 | 1.290886000  | 0.839107000  | H | 6.081890000  | -0.359723000 | 0.590082000  |
| C | -4.094512000 | 1.854151000  | 0.380215000  | C | 5.848422000  | -1.703849000 | -1.077585000 |
| H | -4.575973000 | 1.460167000  | -0.504407000 | H | 6.904201000  | -1.716389000 | -1.325127000 |
| C | -4.677383000 | 2.934636000  | 1.043046000  | C | 4.941751000  | -2.446712000 | -1.827539000 |
| H | -5.600665000 | 3.358134000  | 0.662588000  | H | 5.286698000  | -3.042185000 | -2.665960000 |
| C | -4.081285000 | 3.468066000  | 2.182446000  | C | 3.583873000  | -2.437448000 | -1.504156000 |
| H | -4.538617000 | 4.303925000  | 2.700287000  | H | 2.900029000  | -3.029790000 | -2.097972000 |
| C | -2.884719000 | 2.923080000  | 2.645127000  | C | 0.706925000  | -3.224005000 | -0.681870000 |
| H | -2.403056000 | 3.333905000  | 3.525910000  | C | 0.289890000  | -3.258946000 | -2.019994000 |

|   |              |              |              |   |              |              |              |
|---|--------------|--------------|--------------|---|--------------|--------------|--------------|
| H | 0.265855000  | -2.339104000 | -2.590237000 | H | 1.118035000  | 2.376979000  | 2.119715000  |
| C | -0.114051000 | -4.452969000 | -2.614485000 | H | 0.514038000  | 1.167595000  | 0.862873000  |
| H | -0.432511000 | -4.453361000 | -3.651225000 | H | -0.186826000 | -0.461316000 | -2.063719000 |
| C | -0.119388000 | -5.636902000 | -1.879075000 | C | -1.062900000 | 4.924514000  | -1.065467000 |
| H | -0.439562000 | -6.565643000 | -2.338451000 | C | -0.170080000 | 5.897846000  | 0.933461000  |
| C | 0.283318000  | -5.613576000 | -0.545901000 | H | 0.915239000  | 4.519919000  | 2.152048000  |
| H | 0.275153000  | -6.525574000 | 0.041529000  | H | -0.030323000 | 6.730895000  | 1.608869000  |
| C | 0.694578000  | -4.419668000 | 0.046231000  | H | -1.319079000 | 6.979764000  | -0.563068000 |
| H | 0.985613000  | -4.429046000 | 1.087457000  | H | -1.628278000 | 4.974596000  | -1.986608000 |
| N | 0.226024000  | 3.567350000  | 0.447388000  | C | 4.279905000  | 2.619796000  | -1.261095000 |
| N | 2.562928000  | 2.468506000  | 0.420226000  | C | 4.645724000  | 3.584476000  | 0.904930000  |
| P | -2.057811000 | -0.156527000 | 0.002697000  | H | 3.007742000  | 3.319717000  | 2.255127000  |
| P | 1.294421000  | -1.591933000 | 0.021408000  | H | 5.261780000  | 4.108944000  | 1.622621000  |
| S | 2.143652000  | 1.086981000  | -1.873511000 | H | 6.053913000  | 3.684081000  | -0.750460000 |
| S | -0.875707000 | 2.316907000  | -1.703792000 | H | 4.594319000  | 2.375930000  | -2.267347000 |
| B | 1.066976000  | 2.300937000  | 0.919382000  |   |              |              |              |

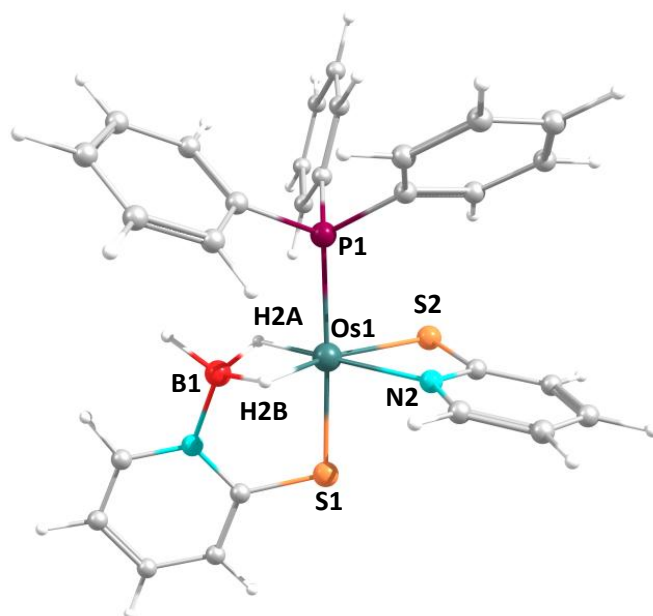

**Figure S92.** Optimized geometry of **5'**.

Total energy = -2446.30688610 a.u.

Cartesian coordinates for the calculated structure **5'** (in Å)

|    |              |              |              |   |             |              |              |
|----|--------------|--------------|--------------|---|-------------|--------------|--------------|
| Os | -0.861100000 | 0.376672000  | 0.219700000  | H | 4.012562000 | -1.454136000 | 0.722846000  |
| C  | 1.195292000  | -2.184642000 | -1.114328000 | C | 3.956028000 | -2.133911000 | 2.754330000  |
| C  | 1.646866000  | -3.440533000 | -0.696183000 | H | 5.017003000 | -2.357265000 | 2.779933000  |
| H  | 2.050304000  | -3.569396000 | 0.299575000  | C | 3.167157000 | -2.350256000 | 3.883993000  |
| C  | 1.577349000  | -4.543694000 | -1.548881000 | H | 3.612165000 | -2.742533000 | 4.791802000  |
| H  | 1.926536000  | -5.509877000 | -1.201360000 | C | 1.807707000 | -2.050890000 | 3.842560000  |
| C  | 1.064930000  | -4.407156000 | -2.835459000 | H | 1.189071000 | -2.204208000 | 4.719879000  |
| H  | 1.015291000  | -5.263765000 | -3.498468000 | C | 1.237332000 | -1.539241000 | 2.677378000  |
| C  | 0.608269000  | -3.160288000 | -3.262993000 | H | 0.184665000 | -1.287673000 | 2.655935000  |
| H  | 0.200100000  | -3.042497000 | -4.260938000 | C | 2.620353000 | 0.322763000  | -0.722848000 |
| C  | 0.663895000  | -2.064504000 | -2.406895000 | C | 3.104096000 | 1.398214000  | 0.037372000  |
| H  | 0.279101000  | -1.108468000 | -2.742401000 | H | 2.673969000 | 1.605856000  | 1.010299000  |
| C  | 2.017051000  | -1.325397000 | 1.536704000  | C | 4.136791000 | 2.198261000  | -0.442741000 |
| C  | 3.385868000  | -1.623919000 | 1.590401000  | H | 4.498668000 | 3.023078000  | 0.161222000  |

|   |              |              |              |   |              |              |              |
|---|--------------|--------------|--------------|---|--------------|--------------|--------------|
| C | 4.704212000  | 1.942488000  | -1.690898000 | C | 0.207941000  | 4.116947000  | -1.969364000 |
| H | 5.509757000  | 2.565802000  | -2.063113000 | H | 0.218777000  | 4.532002000  | -2.968602000 |
| C | 4.231480000  | 0.877879000  | -2.452671000 | C | 0.577320000  | 4.882864000  | -0.855183000 |
| H | 4.669472000  | 0.663693000  | -3.421585000 | H | 0.878992000  | 5.916788000  | -0.981691000 |
| C | 3.197530000  | 0.072326000  | -1.972453000 | C | 0.552700000  | 4.318617000  | 0.409212000  |
| H | 2.858806000  | -0.759977000 | -2.575289000 | H | 0.823962000  | 4.883435000  | 1.292048000  |
| C | -4.083810000 | 0.058146000  | 0.183003000  | C | 0.157319000  | 2.979688000  | 0.543754000  |
| C | -5.499130000 | 0.163074000  | 0.225124000  | P | 1.221699000  | -0.682661000 | -0.015808000 |
| H | -5.927096000 | 1.121883000  | 0.486736000  | S | -3.058832000 | 1.375372000  | 0.533192000  |
| C | -6.288164000 | -0.920446000 | -0.059287000 | S | 0.023250000  | 2.007884000  | 1.980606000  |
| H | -7.367972000 | -0.830285000 | -0.026600000 | B | -1.995943000 | -1.303845000 | -0.184588000 |
| C | -5.688515000 | -2.157807000 | -0.396540000 | N | -3.525800000 | -1.157977000 | -0.142306000 |
| H | -6.282844000 | -3.031625000 | -0.626155000 | N | -0.200868000 | 2.249356000  | -0.547841000 |
| C | -4.325564000 | -2.232762000 | -0.424755000 | H | -1.410710000 | -0.379325000 | -1.202331000 |
| H | -3.793037000 | -3.141608000 | -0.669377000 | H | -1.421578000 | -1.000628000 | 1.098667000  |
| C | -0.178434000 | 2.802320000  | -1.770512000 | H | -1.701950000 | -2.419120000 | -0.490542000 |
| H | -0.483402000 | 2.161323000  | -2.588419000 |   |              |              |              |

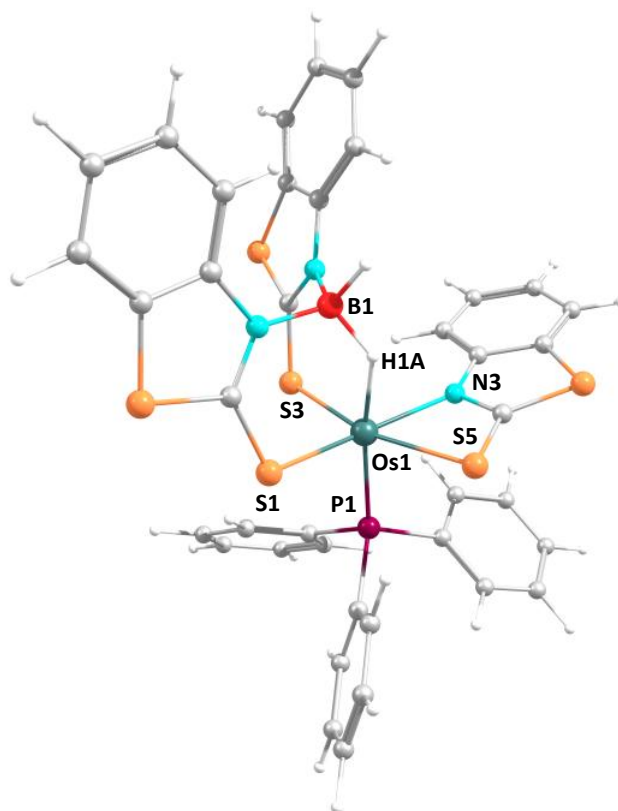

**Figure S93.** Optimized geometry of *trans*-6.

Total energy = -4515.07831409 a.u.

Cartesian coordinates for the calculated structure *trans*-6 (in Å)

|    |              |              |              |   |              |              |              |
|----|--------------|--------------|--------------|---|--------------|--------------|--------------|
| Os | -0.339195000 | -0.281233000 | -0.424968000 | C | -5.204287000 | -3.770255000 | -0.241507000 |
| C  | -3.407211000 | -2.141476000 | -0.376943000 | H | -6.054029000 | -4.180636000 | 0.292878000  |
| C  | -3.013635000 | -2.710124000 | -1.592112000 | C | -4.511564000 | -2.687809000 | 0.293612000  |
| H  | -2.162845000 | -2.307788000 | -2.122423000 | H | -4.832246000 | -2.272216000 | 1.241000000  |
| C  | -3.707560000 | -3.795004000 | -2.128060000 | C | -2.703045000 | -1.015486000 | 2.145222000  |
| H  | -3.384308000 | -4.222899000 | -3.070370000 | C | -1.920662000 | -2.041765000 | 2.693957000  |
| C  | -4.803986000 | -4.327384000 | -1.455838000 | H | -1.211906000 | -2.575211000 | 2.070950000  |
| H  | -5.341354000 | -5.172833000 | -1.871074000 | C | -2.043934000 | -2.388909000 | 4.035785000  |

|   |              |              |              |   |              |              |              |
|---|--------------|--------------|--------------|---|--------------|--------------|--------------|
| H | -1.430836000 | -3.186254000 | 4.440862000  | H | 4.375966000  | 1.892865000  | -1.601361000 |
| C | -2.945074000 | -1.711373000 | 4.856558000  | C | 5.724154000  | 2.941557000  | -0.289171000 |
| H | -3.037224000 | -1.978561000 | 5.903433000  | H | 6.310677000  | 3.345048000  | -1.106280000 |
| C | -3.726038000 | -0.690542000 | 4.322272000  | C | 6.058135000  | 3.265900000  | 1.028757000  |
| H | -4.432830000 | -0.159128000 | 4.950207000  | H | 6.907544000  | 3.907064000  | 1.231727000  |
| C | -3.610486000 | -0.347170000 | 2.974265000  | C | 5.286577000  | 2.788371000  | 2.084944000  |
| H | -4.238917000 | 0.438294000  | 2.575597000  | H | 5.518428000  | 3.057395000  | 3.108463000  |
| C | -3.702405000 | 0.714425000  | 0.008709000  | C | 4.197366000  | 1.973697000  | 1.793646000  |
| C | -4.767632000 | 0.584474000  | -0.888617000 | C | -1.030832000 | 1.708229000  | -2.203754000 |
| H | -4.939778000 | -0.355870000 | -1.395833000 | C | -0.530361000 | 3.108841000  | -0.500458000 |
| C | -5.615873000 | 1.662460000  | -1.142498000 | C | -0.165569000 | 3.538920000  | 0.779570000  |
| H | -6.434749000 | 1.544222000  | -1.843487000 | H | 0.036055000  | 2.809505000  | 1.553125000  |
| C | -5.412467000 | 2.882362000  | -0.503456000 | C | -0.074286000 | 4.903658000  | 1.030301000  |
| H | -6.073659000 | 3.718895000  | -0.700589000 | H | 0.210441000  | 5.243767000  | 2.019433000  |
| C | -4.347221000 | 3.025248000  | 0.385385000  | C | -0.342380000 | 5.844325000  | 0.027628000  |
| H | -4.171759000 | 3.973771000  | 0.880379000  | H | -0.263287000 | 6.903152000  | 0.244503000  |
| C | -3.495316000 | 1.952580000  | 0.632233000  | C | -0.709858000 | 5.430691000  | -1.250769000 |
| H | -2.663771000 | 2.084754000  | 1.313709000  | H | -0.919044000 | 6.155380000  | -2.028787000 |
| C | 1.907529000  | -2.638783000 | -0.502215000 | C | -0.799721000 | 4.065284000  | -1.504613000 |
| C | 4.261688000  | -3.455748000 | -0.678308000 | P | -2.510415000 | -0.668529000 | 0.327108000  |
| C | 5.502303000  | -4.077442000 | -0.773932000 | S | 0.216344000  | -2.590946000 | -0.430750000 |
| H | 5.591174000  | -5.151880000 | -0.666970000 | S | 2.701662000  | -4.208171000 | -0.400488000 |
| C | 6.622972000  | -3.287330000 | -1.013391000 | S | 0.554956000  | -0.008098000 | 1.788634000  |
| H | 7.600016000  | -3.749168000 | -1.090515000 | S | 2.998279000  | 1.332937000  | 2.912173000  |
| C | 6.487008000  | -1.904505000 | -1.157342000 | S | -1.156916000 | 0.108393000  | -2.807581000 |
| H | 7.362736000  | -1.295222000 | -1.347801000 | S | -1.237640000 | 3.259762000  | -3.012229000 |
| C | 5.243480000  | -1.286005000 | -1.059829000 | N | 2.751568000  | 0.764808000  | 0.385515000  |
| H | 5.165558000  | -0.216987000 | -1.173285000 | N | 2.778127000  | -1.620010000 | -0.690455000 |
| C | 4.111104000  | -2.065493000 | -0.813924000 | N | -0.676917000 | 1.799253000  | -0.930530000 |
| C | 2.103366000  | 0.631285000  | 1.564486000  | B | 2.391311000  | -0.102769000 | -0.870025000 |
| C | 3.879726000  | 1.601622000  | 0.476302000  | H | 2.974791000  | 0.325805000  | -1.820625000 |
| C | 4.640422000  | 2.116437000  | -0.577151000 | H | 1.214738000  | 0.043274000  | -1.272104000 |



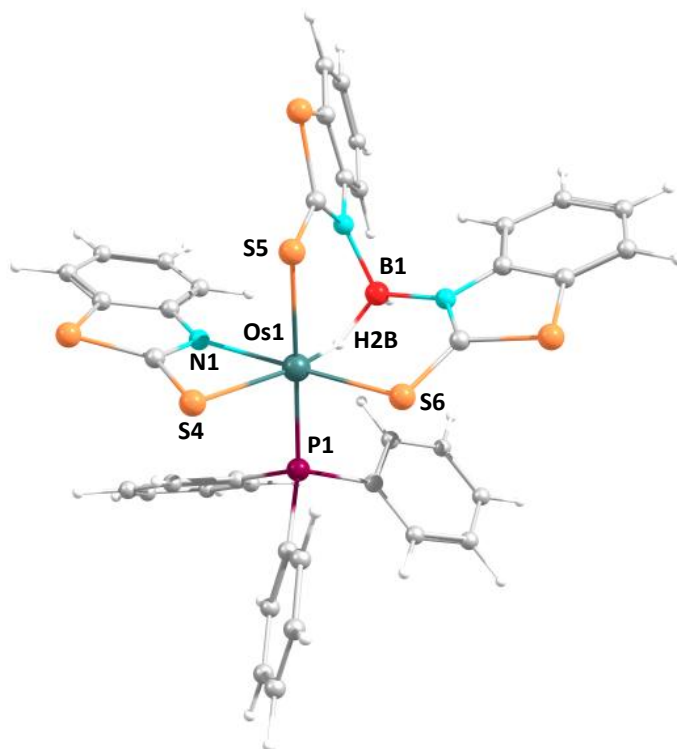

**Figure S94.** Optimized geometry of *cis-6*.

Total energy = -2446.30688610 a.u.

Cartesian coordinates for the calculated structure *cis-6* (in Å)

|   |              |              |              |   |              |              |              |
|---|--------------|--------------|--------------|---|--------------|--------------|--------------|
| B | -1.782311000 | -0.332702000 | 0.409994000  | C | -5.942948000 | -3.613298000 | 0.701799000  |
| C | 1.428149000  | 4.293929000  | -0.283282000 | H | -6.867737000 | -4.137735000 | 0.910623000  |
| C | 1.299407000  | 5.519348000  | 0.363405000  | C | -5.027599000 | -4.156966000 | -0.195263000 |
| H | 1.793869000  | 6.404703000  | -0.018417000 | H | -5.224322000 | -5.102103000 | -0.687024000 |
| C | 0.516790000  | 5.581427000  | 1.514179000  | C | -3.849994000 | -3.460326000 | -0.444500000 |
| H | 0.402550000  | 6.526832000  | 2.031362000  | C | -1.644603000 | -2.470927000 | -1.064749000 |
| C | -0.121420000 | 4.435483000  | 2.006177000  | C | 3.008588000  | 0.227017000  | 3.003480000  |
| H | -0.725252000 | 4.504447000  | 2.903667000  | H | 2.438448000  | -0.533447000 | 3.520425000  |
| C | 0.005837000  | 3.211198000  | 1.360738000  | C | 3.715933000  | 1.168737000  | 3.753393000  |
| H | -0.483391000 | 2.322078000  | 1.736919000  | H | 3.671866000  | 1.131120000  | 4.836473000  |
| C | 0.785167000  | 3.134476000  | 0.203752000  | C | 4.478975000  | 2.143559000  | 3.118099000  |
| C | 1.809641000  | 2.240550000  | -1.602121000 | H | 5.028178000  | 2.874139000  | 3.701445000  |
| C | -4.305155000 | 2.503975000  | -0.182730000 | C | 4.537761000  | 2.169718000  | 1.724528000  |
| C | -5.326617000 | 3.283778000  | 0.350080000  | H | 5.135205000  | 2.919512000  | 1.217928000  |
| H | -5.910658000 | 3.938797000  | -0.285138000 | C | 3.831205000  | 1.234138000  | 0.975915000  |
| C | -5.567826000 | 3.215938000  | 1.719427000  | H | 3.900930000  | 1.256054000  | -0.105288000 |
| H | -6.355020000 | 3.818510000  | 2.156414000  | C | 3.052459000  | 0.251768000  | 1.606024000  |
| C | -4.784968000 | 2.390112000  | 2.531353000  | C | 3.475197000  | -2.264235000 | -1.621572000 |
| H | -4.964388000 | 2.362544000  | 3.599852000  | H | 2.569821000  | -2.096939000 | -2.187916000 |
| C | -3.768788000 | 1.604037000  | 1.994895000  | C | 4.537902000  | -2.942512000 | -2.217589000 |
| H | -3.161160000 | 0.980818000  | 2.636230000  | H | 4.441717000  | -3.296152000 | -3.237969000 |
| C | -3.535350000 | 1.641060000  | 0.616891000  | C | 5.717828000  | -3.156063000 | -1.509955000 |
| C | -2.462529000 | 1.332740000  | -1.393326000 | H | 6.546166000  | -3.678947000 | -1.975098000 |
| C | -3.563514000 | -2.232486000 | 0.176109000  | C | 5.830548000  | -2.687932000 | -0.201227000 |
| C | -4.488861000 | -1.701371000 | 1.077041000  | H | 6.746759000  | -2.845406000 | 0.357170000  |
| H | -4.304023000 | -0.762633000 | 1.573590000  | C | 4.768091000  | -2.012433000 | 0.393768000  |
| C | -5.668239000 | -2.397065000 | 1.331200000  | H | 4.873112000  | -1.652054000 | 1.410014000  |
| H | -6.383783000 | -1.979673000 | 2.029994000  | C | 3.574714000  | -1.793329000 | -0.309322000 |

|   |              |              |              |    |              |              |              |
|---|--------------|--------------|--------------|----|--------------|--------------|--------------|
| C | 1.522013000  | -2.247957000 | 1.677321000  | N  | -2.561084000 | 0.931257000  | -0.107781000 |
| C | 0.526833000  | -1.926561000 | 2.612152000  | N  | -2.326065000 | -1.675279000 | -0.208231000 |
| H | 0.143910000  | -0.915657000 | 2.670353000  | Os | 0.466144000  | -0.040528000 | -0.867184000 |
| C | 0.012272000  | -2.893394000 | 3.471489000  | P  | 2.137409000  | -0.939415000 | 0.508782000  |
| H | -0.752401000 | -2.620436000 | 4.190464000  | S  | 2.344745000  | 3.914428000  | -1.744241000 |
| C | 0.469984000  | -4.208613000 | 3.400855000  | S  | -3.723800000 | 2.472421000  | -1.842875000 |
| H | 0.064791000  | -4.964274000 | 4.064522000  | S  | -2.531877000 | -3.925210000 | -1.506130000 |
| C | 1.445201000  | -4.544052000 | 2.466363000  | S  | 2.123245000  | 0.854301000  | -2.567291000 |
| H | 1.802659000  | -5.565363000 | 2.394699000  | S  | -1.231334000 | 0.882417000  | -2.450514000 |
| C | 1.969587000  | -3.572389000 | 1.613479000  | S  | -0.093407000 | -2.214472000 | -1.671702000 |
| H | 2.726604000  | -3.856302000 | 0.894690000  | H  | -1.959898000 | -0.393092000 | 1.594426000  |
| N | 1.022605000  | 2.008354000  | -0.564460000 | H  | -0.490482000 | -0.203474000 | 0.547577000  |

## V References

- G. Ferrando and K. G. Caulton, *Inorg. Chem.*, 1999, **38**, 4168–4170.
- G. E. Ryschlewitsch, K. C. Nainan, S. R. Miller, L. J. Todd, W. J. Dewkett, M. Grace, H. Beall, M. F. Hawthorne and R. Leyden, *Inorg. Synth.*, 2007, **15**, 111–118.
- (a) J. J. Led and H. Gesmar, *Chem. Rev.*, 1991, **91**, 1413–1426; (b) L. Yang, R. Simionescu, A. Lough and H. Yan, *Dyes Pigm.*, 2011, **91**, 264–267; (c) R. Weiss and R. N. Grimes, *J. Am. Chem. Soc.*, 1978, **100**, 1401–1405.
- (a) G. M. Sheldrick, *Acta Crystallogr., Sect. A: Found. Adv.*, 2015, **A71**, 3–8; (b) G. M. Sheldrick, *SHELXL97*; University of Gottingen: Germany, 1997.
- G. M. Sheldrick, *Acta Crystallogr., Sect. C: Struct. Chem.* 2015, **C71**, 3 – 8.
- O. V. Dolomanov, L. J. Bourhis, R. J. Gildea, J. A. K. Howard and H. Puschmann, *J. Appl. Crystallogr.*, 2009, **42**, 339–341.
- M. J. Frisch, G. W. Trucks, H. B. Schlegel, G. E. Scuseria, M. A. Robb, J. R. Cheeseman, G. Scalmani, V. Barone, B. Mennucci, G. A. Petersson, H. Nakatsuji, M. Caricato, X. Li, H. P. Hratchian, A. F. Izmaylov, J. Bloino, G. Zheng, J. L. Sonnenberg, M. Hada, M. Ehara, K. Toyota, R. Fukuda, J. Hasegawa, M. Ishida, T. Nakajima, Y. Honda, O. Kitao, H. Nakai, T. Vreven, J. A. Montgomery, J. E. Peralta, F. Ogliaro, M. Bearpark, J. J. Heyd, E. Brothers, K. N. Kudin, V. N. Staroverov, T. Keith, R. Kobayashi, J. Normand, K. Raghavachari, A. Rendell, J. C. Burant, S. S. Iyengar, J. Tomasi, M. Cossi, N. Rega, J. M. Millam, M. Klene, J. E. Knox, J. B. Cross, V. Bakken, C. Adamo, J. Jaramillo, R. Gomperts, R. E. Stratmann, O. Yazyev, A. J. Austin, R. Cammi, C. Pomelli, J. W. Ochterski, R. L. Martin, K. Morokuma, V. G. Zakrzewski, G. A. Voth, P. Salvador, J. J. Dannenberg, S. Dapprich, A. D. Daniels, O. Farkas, J. B. Foresman, J. V. Ortiz, J. Cioslowski and D. J. Fox, *Gaussian16, Rev. B.01*; Gaussian, Inc., Wallingford CT, 2016.
- C. Lee, W. Yang and R. G. Parr, *Phys. Rev. B*, 1988, **37**, 785–789.
- EMSL Basis Set Exchange Library. <https://bse.pnl.gov/bse/portal>
- F. London, *J. Phys. Radium*, 1937, **8**, 397 – 409; (b) R. Ditchfield, *Mol. Phys.*, 1974, **27**, 789 - 807; (c) K. Wolinski, J. F. Hinton and P. Pulay, *J. Am. Chem. Soc.*, 1990, **112**, 8251 – 8260.
- K. Wiberg, *Tetrahedron*, 1968, **24**, 1083–1096.
- E. D. Glendening, J. K. Badenhoop, A. E. Reed, J. E. Carpenter, J. A. Bohmann, C.M. Morales, C. R. Landis and F. Weinhold, *NBO Program 6.0*; Theoretical Chemistry Institute, University of Wisconsin: Madison, WI, USA, 2013.
- Chemcraft-Graphical Software for Visualization of Quantum Chemistry Computations. Available online: <https://www.chemcraftprog.com> (accessed on 1 December 2021).
- T. Lu and F. Chen, *J. Comput. Chem.* 2012, **33**, 580–592.
